# Supplementary material for: The key role of protodeauration in the gold-catalyzed reaction of 1,3-diynes with pyrrole and indole to form complex heterocycles
Source: Royal Society of Chemistry journal article supplement (doi:10.1039/c9qo01544b), 2020-01-01
Supplement: c9qo01544b1.pdf [file c9qo01544b1.pdf]

**Supporting Information:**

**The Key Role of Protodeauration in the  
Gold-Catalyzed Reaction of 1,3-Diynes with  
Pyrrole and Indole to Form Complex  
Heterocycles**

Ioannis Stylianakis,<sup>†</sup> Olalla Nieto Faza,<sup>‡</sup> Carlos Silva López,<sup>\*,†</sup> and Antonios  
Kolocouris<sup>\*,†</sup>

<sup>†</sup>*Department of Medicinal Chemistry, Faculty of Pharmacy, National and Kapodistrian  
University of Athens Panepistimioupolis Zografou, Athens, 15771*

<sup>‡</sup>*Departamento de Química Orgánica. Campus Lagoas-Marcosende, 36310, Vigo, Spain*

E-mail: carlos.silva@uvigo.es; ankol@pharm.uoa.gr

Phone: +34 986813268; 210-727-4834

# Contents

|                                                |      |
|------------------------------------------------|------|
| Solvation Effects                              | S-3  |
| Cartesian coordinates of the pyrrole mechanism | S-6  |
| Cartesian coordinates of the indole mechanism  | S-37 |
| Cartesian coordinates of substituted dyines    | S-63 |
| Ester . . . . .                                | S-64 |
| Cyclohexane . . . . .                          | S-70 |
| Methoxy . . . . .                              | S-76 |

# List of Figures

|    |                                             |      |
|----|---------------------------------------------|------|
| S1 | Pyrrole reaction mechanism, part 1. . . . . | S-6  |
| S2 | Pyrrole reaction mechanism, part 2. . . . . | S-7  |
| S3 | Pyrrole reaction mechanism, part 3. . . . . | S-8  |
| S4 | Pyrrole reaction mechanism, part 4. . . . . | S-9  |
| S5 | Indole reaction mechanism, part 1. . . . .  | S-37 |
| S6 | Indole reaction mechanism, part 2. . . . .  | S-38 |
| S7 | Reaction mechanism. . . . .                 | S-63 |

# Solvation Effects

| Structure      | Gas phase SCF energy | Solv. Effect  | Solution phase SCF energy        |
|----------------|----------------------|---------------|----------------------------------|
| Pyrrole series | A.U.                 | kcal/mol      | A.U.                             |
| 1a             | -209.84360087        | -3.38         | -209.848983061                   |
| 2a             | -1211.03477496       | <b>-34.57</b> | -1211.089859610                  |
| 10a            | -1420.89950864       | <b>-35.28</b> | -1420.955724140                  |
| 3a1            | -1420.90950949       | <b>-32.43</b> | -1420.961193420                  |
| 3a             | -1420.90574240       | <b>-36.27</b> | -1420.963540690                  |
| 4a'            | -1420.95486577       | <b>-34.92</b> | -1421.010509440                  |
| 4a             | -1420.95476697       | <b>-34.41</b> | -1421.009594860                  |
| 5a             | -1420.97372745       | <b>-32.69</b> | <b>-34.57</b><br>-1421.025814960 |
| 6a             | -1420.96009921       | <b>-33.10</b> | -1421.012841870                  |
| 7a1            | -1420.91284172       | <b>-35.04</b> | -1420.968685420                  |
| 7a             | -1420.90003616       | <b>-37.18</b> | -1420.959278870                  |
| 8a'            | -1420.95080312       | <b>-33.28</b> | -1421.003837740                  |
| 8a             | -1420.94447008       | <b>-36.22</b> | -1421.002184800                  |
| 9a             | -1420.95052642       | <b>-34.09</b> | -1421.004860200                  |
| TS_2a_3a       | -1420.87531684       | <b>-32.91</b> | -1420.927759040                  |
| TS_2a_7a       | -1420.88231236       | <b>-32.32</b> | -1420.933824540                  |
| TS_3a1_4a'     | -1420.89437105       | <b>-32.38</b> | -1420.945967200                  |
| TS_3a_3a1      | -1420.86520474       | <b>-32.24</b> | -1420.916582910                  |
| TS_4a_5a       | -1420.93327642       | <b>-31.10</b> | -1420.982840900                  |
| TS_4a_6a       | -1420.93246316       | <b>-32.43</b> | <b>-32.64</b><br>-1420.984140970 |
| TS_7a1_8a'     | -1420.87879273       | <b>-34.27</b> | -1420.933401430                  |
| TS_7a_7a1      | -1420.85162928       | <b>-32.73</b> | -1420.903792470                  |
| TS_8a_10a      | -1420.89845568       | <b>-34.10</b> | -1420.952801570                  |
| TS_8a_9a       | -1420.91662082       | <b>-31.90</b> | -1420.967448920                  |
| P1             | -824.66425008        | -4.80         | -824.671903421                   |
| P2             | -824.60986717        | -5.53         | -824.618672133                   |
| P3             | -824.60981150        | -5.29         | -824.618234218                   |
| P4             | -824.55295966        | -6.15         | -824.562758701                   |

average values in boldface

| Structure                 | Gas phase SCF energy | Solv. Effect | Solution phase SCF energy |
|---------------------------|----------------------|--------------|---------------------------|
| Substituted diynes series | A.U.                 | kcal/mol     | A.U.                      |
| 4c                        | -1428.17122465       | -33.34       | -1428.22435949            |
| 5c                        | -1428.18501587       | -32.03       | -1428.23606384            |
| 6c                        | -1428.17176255       | -32.19       | -1428.22306481            |
| TS_4c_5c                  | -1428.14137830       | -31.11       | -1428.19094761            |
| TS_4c_6c                  | -1428.14448818       | -31.81       | -1428.19517273            |
| 4e                        | -1876.13402412       | -38.83       | -1876.19590840            |
| 5e                        | -1876.15315286       | -37.38       | -1876.21272032            |
| 6e                        | -1876.13983381       | -38.40       | -1876.20103320            |
| TS_4e_5e                  | -1876.11161867       | -35.48       | -1876.16816125            |
| TS_4e_6e                  | -1876.11132546       | -37.48       | -1876.17104680            |
| 4d                        | -1649.70767629       | -34.51       | -1649.76266656            |
| 5d                        | -1649.72620714       | -32.46       | -1649.77792896            |
| 6d                        | -1649.71199006       | -32.98       | -1649.76455482            |
| TS_4d_5d                  | -1649.68808426       | -30.86       | -1649.73726564            |
| TS_4d_6d                  | -1649.68475176       | -32.50       | -1649.73655130            |

average values in boldface

| Structure     | Gas phase SCF energy | Solv. Effect  | Solution phase SCF energy        |
|---------------|----------------------|---------------|----------------------------------|
| Indole series | A.U.                 | kcal/mol      | A.U.                             |
| 11a           | -363.260459274       | -3.96         | -363.266770063                   |
| 2a            | -1211.034774960      | <b>-34.57</b> | -1211.089859610                  |
| 12a1          | -1574.325994990      | <b>-32.85</b> | -1574.378341700                  |
| 12a           | -1574.319431370      | <b>-32.52</b> | -1574.371247640                  |
| 13a'          | -1574.364529040      | <b>-35.67</b> | -1574.421380440                  |
| 13a           | -1574.368188610      | <b>-35.60</b> | -1574.424913650                  |
| 14a           | -1574.399607430      | <b>-31.42</b> | -1574.449683700                  |
| 15a1          | -1574.333044490      | <b>-31.40</b> | <b>-34.02</b><br>-1574.383090660 |
| 15a           | -1574.324975630      | <b>-36.48</b> | -1574.383103650                  |
| 16a'          | -1574.366056440      | <b>-35.89</b> | -1574.423243570                  |
| 16a           | -1574.369499470      | <b>-35.64</b> | -1574.426302540                  |
| 17a           | -1574.389280840      | <b>-30.93</b> | -1574.438567400                  |
| 18a           | -1574.371694730      | <b>-35.22</b> | -1574.427826270                  |
| TS_12a1_13a'  | -1574.308056390      | <b>-32.69</b> | -1574.360157840                  |
| TS_12a_12a1   | -1574.281740880      | <b>-31.03</b> | -1574.331184660                  |
| TS_13a_14a    | -1574.355734640      | <b>-30.86</b> | -1574.404909650                  |
| TS_15a1_16a'  | -1574.312048130      | <b>-32.37</b> | -1574.363636200                  |
| TS_15a_15a1   | -1574.283456960      | <b>-32.50</b> | <b>-32.13</b><br>-1574.335254890 |
| TS_16a_18a    | -1574.356158710      | <b>-32.81</b> | -1574.408442320                  |
| TS_18a_17a    | -1574.355806210      | <b>-31.63</b> | -1574.406212830                  |
| TS_2a_12a     | -1574.287285080      | <b>-31.84</b> | -1574.338033040                  |
| TS_2a_15a     | -1574.294627310      | <b>-33.43</b> | -1574.347897520                  |
| P             | -978.082978848       | -4.69         | -978.090456570                   |

average values in boldface

# Cartesian coordinates of the pyrrole mechanism

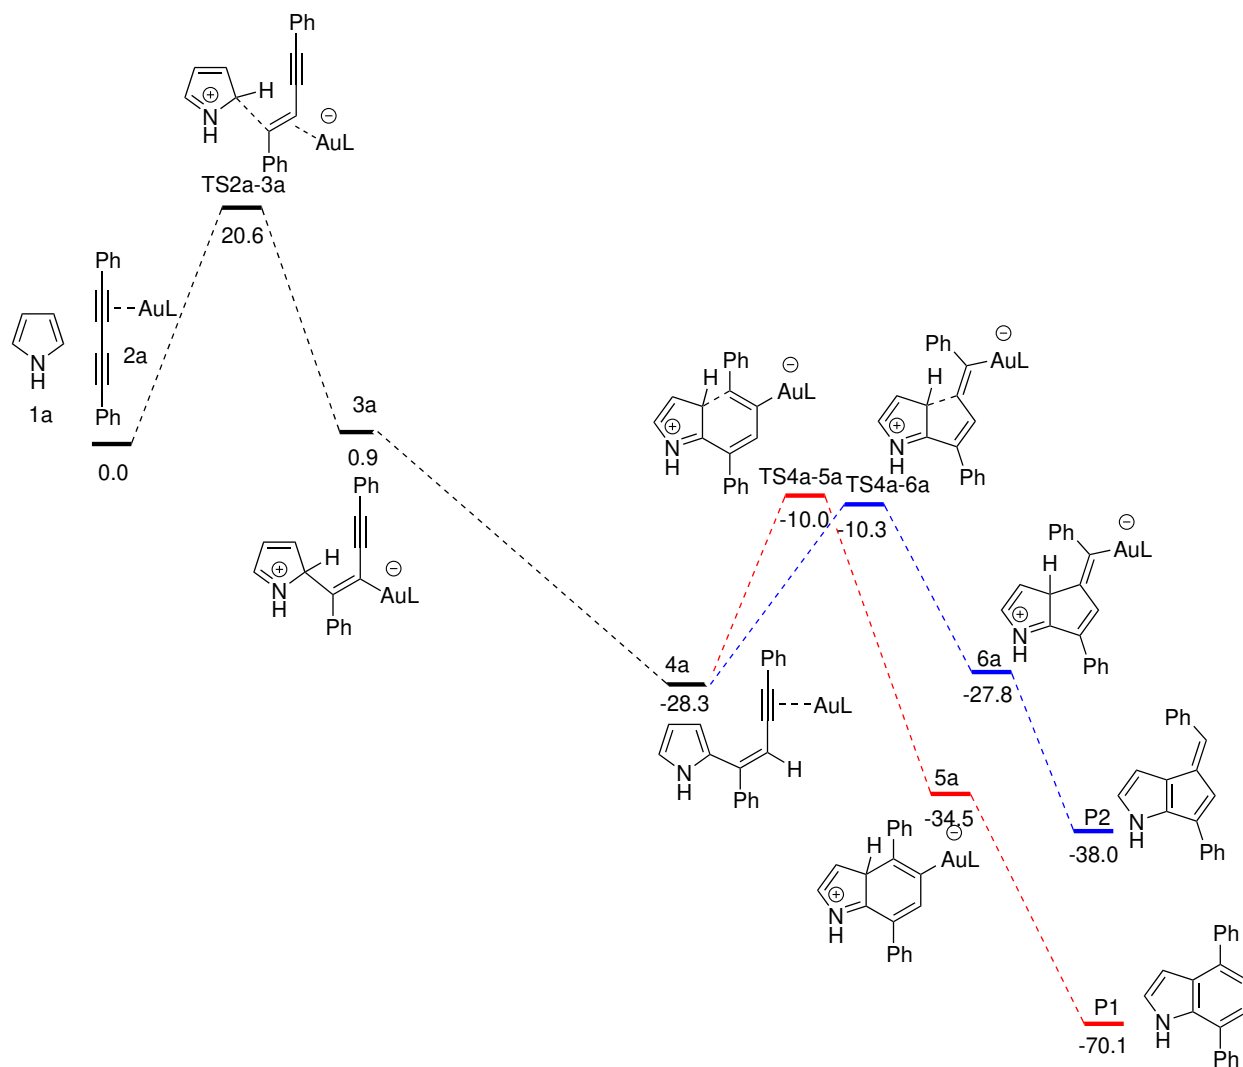

Figure S1: Pyrrole reaction mechanism, part 1.

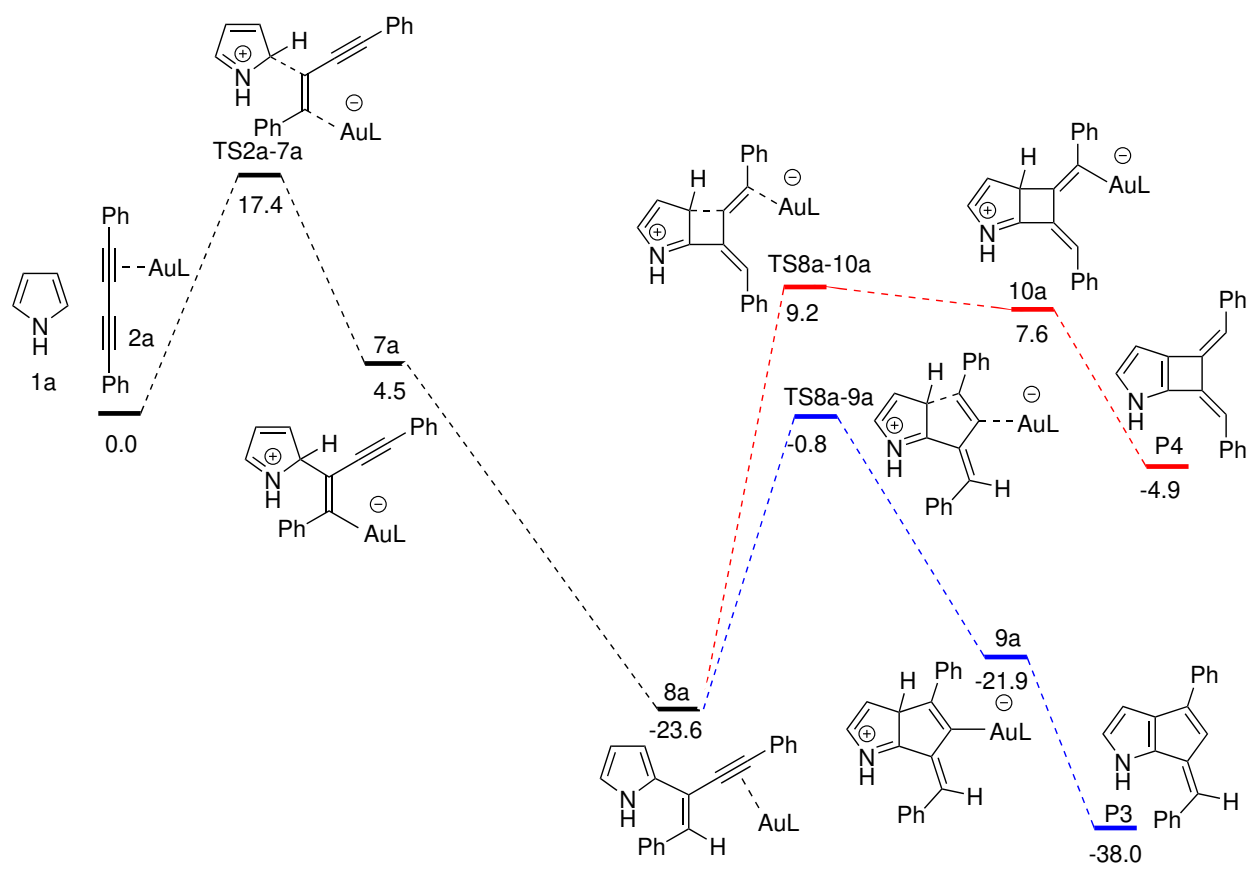

Figure S2: Pyrrole reaction mechanism, part 2.

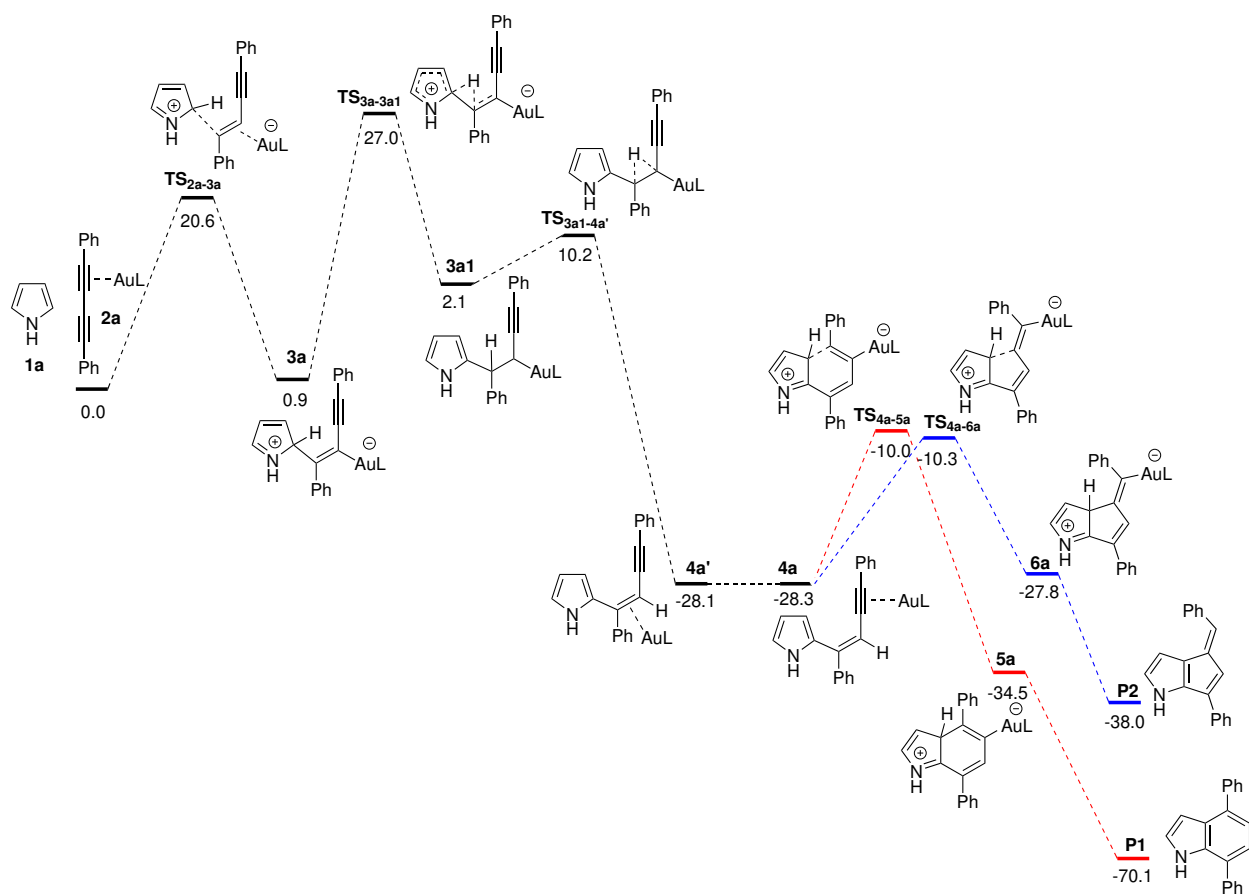

Figure S3: Pyrrole reaction mechanism, part 3.



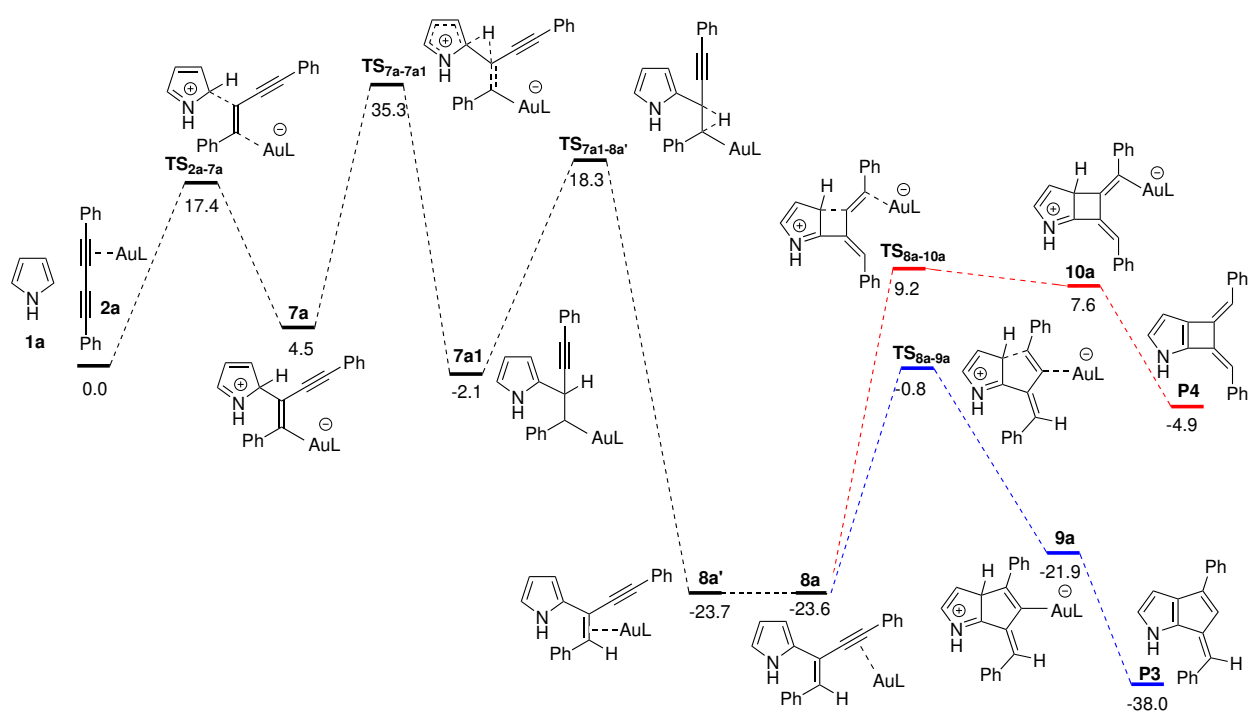

Figure S4: Pyrrole reaction mechanism, part 4.

10a  
SCF Energy: -1420.95572414  
ZPE-corrected Energy: -1420.55501  
 $\Delta U$ : -1420.52829  
 $\Delta H$ : -1420.52734  
 $\Delta G$ : -1420.61550

Num. Imaginary Frequencies: 0

|    |           |           |           |
|----|-----------|-----------|-----------|
| C  | 2.512032  | 1.506871  | -0.198976 |
| C  | 3.440820  | 1.051094  | 0.754072  |
| C  | 4.707772  | 1.618223  | 0.852824  |
| C  | 5.092456  | 2.633250  | -0.024054 |
| C  | 4.196590  | 3.075999  | -0.997837 |
| C  | 2.920247  | 2.525254  | -1.080037 |
| H  | 3.146730  | 0.241272  | 1.434563  |
| H  | 5.407451  | 1.256424  | 1.615138  |
| H  | 6.095331  | 3.070154  | 0.042588  |
| H  | 4.497248  | 3.856692  | -1.706371 |
| H  | 2.237151  | 2.865771  | -1.867450 |
| C  | 1.170008  | 0.910553  | -0.262721 |
| C  | 0.386545  | 4.266861  | 0.422275  |
| C  | -0.082230 | 3.273753  | -0.570747 |
| C  | -0.587922 | 4.415789  | 1.345797  |
| N  | -1.654122 | 3.526752  | 1.066359  |
| C  | -1.388490 | 2.862645  | -0.039968 |
| C  | -1.373640 | 1.461850  | -0.440663 |
| C  | -2.241468 | 0.432121  | -0.528271 |
| C  | -3.680317 | 0.459404  | -0.339588 |
| C  | -4.428410 | 1.650765  | -0.286454 |
| C  | -5.799251 | 1.616782  | -0.063378 |
| C  | -6.455322 | 0.394156  | 0.101522  |
| C  | -5.731560 | -0.796334 | 0.031489  |
| C  | -4.359607 | -0.763774 | -0.193099 |
| C  | 0.079186  | 1.679235  | -0.493602 |
| H  | 1.293278  | 4.870223  | 0.351627  |
| H  | -0.040181 | 3.591361  | -1.628267 |
| H  | -0.660480 | 5.079160  | 2.208794  |
| H  | -3.938216 | 2.618280  | -0.453861 |
| H  | -6.367473 | 2.552909  | -0.030089 |
| H  | -7.537110 | 0.371134  | 0.273548  |
| H  | -6.242332 | -1.758252 | 0.150440  |
| H  | -3.787921 | -1.699035 | -0.246865 |
| H  | -2.370616 | 3.263932  | 1.746925  |
| H  | -1.795970 | -0.550753 | -0.749783 |
| Au | 0.920488  | -1.159174 | -0.059534 |
| P  | 0.544337  | -3.503876 | 0.154965  |
| C  | 2.030563  | -4.560764 | 0.111130  |
| C  | -0.310485 | -3.991265 | 1.692664  |
| C  | -0.524235 | -4.171918 | -1.166021 |
| H  | 1.749231  | -5.626967 | 0.197781  |
| H  | 2.572198  | -4.402310 | -0.838200 |
| H  | 2.702523  | -4.292184 | 0.945285  |
| H  | -1.278963 | -3.463772 | 1.760144  |
| H  | -0.488518 | -5.083202 | 1.707020  |
| H  | 0.301734  | -3.710033 | 2.567672  |
| H  | -1.494485 | -3.642564 | -1.159490 |
| H  | -0.046963 | -4.011837 | -2.149025 |
| H  | -0.698088 | -5.254058 | -1.016107 |

1a  
 SCF Energy: -209.848983061  
 ZPE-corrected Energy: -209.767134  
 $\Delta U$ : -209.763200  
 $\Delta H$ : -209.762255  
 $\Delta G$ : -209.793504  
 Num. Imaginary Frequencies: 0

|   |           |           |           |
|---|-----------|-----------|-----------|
| N | -1.119940 | -0.002327 | 0.000194  |
| C | -0.331237 | -1.120754 | -0.000020 |
| C | 0.985951  | -0.709769 | -0.000189 |
| C | 0.982947  | 0.713731  | 0.000102  |
| C | -0.335870 | 1.119486  | -0.000153 |
| H | 1.860301  | -1.364504 | 0.000859  |
| H | 1.854458  | 1.372266  | -0.000423 |
| H | -0.779644 | 2.116300  | 0.000469  |
| H | -2.135472 | -0.004523 | -0.000510 |
| H | -0.770807 | -2.119418 | -0.000196 |

2a  
 SCF Energy: -1211.08985961  
 ZPE-corrected Energy: -1210.77538  
 $\Delta U$ : -1210.75188  
 $\Delta H$ : -1210.75094  
 $\Delta G$ : -1210.83407  
 Num. Imaginary Frequencies: 0

|    |           |           |           |
|----|-----------|-----------|-----------|
| C  | 2.263116  | -3.407703 | 0.834993  |
| C  | 2.025446  | -2.386296 | -0.102300 |
| C  | 3.026257  | -2.041097 | -1.027855 |
| C  | 4.242010  | -2.714396 | -1.015256 |
| C  | 4.473098  | -3.727508 | -0.083225 |
| C  | 3.484024  | -4.072051 | 0.839061  |
| C  | 0.750358  | -1.733395 | -0.104313 |
| C  | -0.453279 | -1.423727 | -0.062375 |
| Au | 0.806350  | 0.595694  | 0.012371  |
| C  | -1.805337 | -1.215738 | -0.059869 |
| C  | -3.015050 | -1.036132 | -0.057256 |
| C  | -4.421492 | -0.838012 | -0.057516 |
| C  | -5.077162 | -0.419084 | -1.230331 |
| C  | -6.453738 | -0.229329 | -1.225418 |
| C  | -7.188380 | -0.456506 | -0.060311 |
| C  | -6.544830 | -0.873500 | 1.106172  |
| C  | -5.168305 | -1.063475 | 1.113958  |
| H  | -4.654377 | -1.390389 | 2.024476  |
| H  | -8.273874 | -0.307748 | -0.061645 |
| H  | -6.960771 | 0.097051  | -2.139916 |
| H  | -4.492688 | -0.246915 | -2.140738 |
| H  | -7.123335 | -1.052138 | 2.019020  |
| H  | 1.480207  | -3.671739 | 1.554066  |
| H  | 3.665708  | -4.867951 | 1.569280  |
| H  | 5.433759  | -4.254066 | -0.076101 |
| H  | 5.017927  | -2.447090 | -1.740537 |
| H  | 2.836783  | -1.247655 | -1.760445 |
| P  | 1.486194  | 2.824201  | 0.138581  |
| C  | 3.148366  | 3.086795  | -0.548997 |
| C  | 1.554679  | 3.455504  | 1.841447  |
| C  | 0.393460  | 3.963870  | -0.761987 |
| H  | 0.552554  | 3.396415  | 2.300675  |
| H  | 2.254699  | 2.845238  | 2.438132  |
| H  | 0.358238  | 3.684439  | -1.829400 |
| H  | -0.627643 | 3.908132  | -0.346204 |
| H  | 1.895556  | 4.507735  | 1.838165  |
| H  | 0.772142  | 4.998503  | -0.665228 |
| H  | 3.426499  | 4.153490  | -0.460217 |
| H  | 3.880588  | 2.470781  | 0.001496  |
| H  | 3.163991  | 2.791702  | -1.612662 |

3a1  
 SCF Energy: -1420.96119342  
 ZPE-corrected Energy: -1420.56153  
 $\Delta U$ : -1420.53401  
 $\Delta H$ : -1420.53306  
 $\Delta G$ : -1420.62426

Num. Imaginary Frequencies: 0

|    |           |           |           |
|----|-----------|-----------|-----------|
| N  | 1.731712  | 3.872032  | 0.861732  |
| C  | 1.509674  | 2.681253  | 0.214983  |
| C  | 2.401495  | 2.611885  | -0.839815 |
| C  | 3.185736  | 3.798219  | -0.814477 |
| C  | 2.744816  | 4.556293  | 0.249671  |
| C  | 0.380441  | 1.791154  | 0.641611  |
| C  | -0.982277 | 2.297732  | 0.198340  |
| C  | -1.996536 | 2.539587  | 1.126329  |
| C  | -3.268211 | 2.924807  | 0.698002  |
| C  | -3.532462 | 3.069028  | -0.662845 |
| C  | -2.518228 | 2.837700  | -1.594728 |
| C  | -1.248280 | 2.460184  | -1.165274 |
| C  | 0.539892  | 0.327257  | 0.369248  |
| Au | -1.168171 | -0.854749 | 0.169647  |
| C  | 1.766424  | -0.235812 | 0.275836  |
| C  | 2.861626  | -0.812410 | 0.169495  |
| C  | 4.137412  | -1.374628 | 0.045782  |
| C  | 5.277298  | -0.535002 | 0.069532  |
| C  | 6.541664  | -1.085982 | -0.061056 |
| C  | 6.683400  | -2.469269 | -0.212811 |
| C  | 5.566224  | -3.310969 | -0.237659 |
| C  | 4.296654  | -2.772066 | -0.110808 |
| H  | 7.685491  | -2.900654 | -0.313946 |
| H  | 7.427060  | -0.442452 | -0.044859 |
| H  | 5.137001  | 0.545254  | 0.188457  |
| H  | 3.406975  | -3.410346 | -0.128739 |
| H  | 5.696306  | -4.391228 | -0.357739 |
| H  | -1.794695 | 2.413392  | 2.198479  |
| H  | -4.057016 | 3.114139  | 1.435129  |
| H  | -4.530919 | 3.369409  | -1.000603 |
| H  | -2.718970 | 2.955207  | -2.665805 |
| H  | -0.447725 | 2.278854  | -1.895909 |
| H  | 2.477374  | 1.793971  | -1.560739 |
| H  | 3.988545  | 4.066416  | -1.504012 |
| H  | 3.075560  | 5.525383  | 0.625449  |
| H  | 1.208203  | 4.201890  | 1.668590  |
| H  | 0.366934  | 1.776613  | 1.761807  |
| P  | -3.198046 | -2.055875 | -0.123230 |
| C  | -3.199122 | -3.226776 | -1.519439 |
| C  | -3.732121 | -3.046324 | 1.309953  |
| C  | -4.592292 | -0.929143 | -0.454348 |
| H  | -2.427227 | -3.999762 | -1.358225 |
| H  | -2.968994 | -2.689598 | -2.456254 |
| H  | -3.834167 | -2.395361 | 2.195919  |
| H  | -2.978372 | -3.822948 | 1.528760  |
| H  | -4.188631 | -3.712417 | -1.609504 |
| H  | -4.704252 | -3.529447 | 1.097146  |
| H  | -5.526819 | -1.500906 | -0.607497 |
| H  | -4.719450 | -0.240391 | 0.400327  |
| H  | -4.377377 | -0.326259 | -1.355175 |

3a  
 SCF Energy: -1420.96354069  
 ZPE-corrected Energy: -1420.56314  
 $\Delta U$ : -1420.53564  
 $\Delta H$ : -1420.53470  
 $\Delta G$ : -1420.62617

Num. Imaginary Frequencies: 0

|    |           |           |           |
|----|-----------|-----------|-----------|
| N  | -1.604615 | 3.612512  | 0.727600  |
| C  | -1.292418 | 2.880041  | -0.499723 |
| C  | -2.640745 | 2.449060  | -0.942030 |
| C  | -3.586505 | 2.948101  | -0.099093 |
| C  | -2.894732 | 3.639225  | 0.938244  |
| C  | -0.156643 | 1.882694  | -0.297595 |
| C  | 1.180493  | 2.514326  | -0.173723 |
| C  | 1.641044  | 3.456550  | -1.106757 |
| C  | 2.909281  | 4.021567  | -0.990406 |
| C  | 3.738957  | 3.670283  | 0.073963  |
| C  | 3.288194  | 2.753386  | 1.023415  |
| C  | 2.021735  | 2.185896  | 0.902830  |
| C  | -0.369584 | 0.548014  | -0.158304 |
| Au | 1.191964  | -0.861646 | -0.021824 |
| C  | -1.664603 | -0.008629 | -0.142761 |
| C  | -2.763301 | -0.549987 | -0.097810 |
| C  | -4.072846 | -1.106902 | -0.033303 |
| C  | -5.014169 | -0.594705 | 0.880045  |
| C  | -6.295989 | -1.130748 | 0.944494  |
| C  | -6.661722 | -2.179542 | 0.099566  |
| C  | -5.736726 | -2.694131 | -0.810497 |
| C  | -4.451401 | -2.167156 | -0.877717 |
| H  | -7.672484 | -2.599649 | 0.151747  |
| H  | -7.018594 | -0.726561 | 1.662516  |
| H  | -4.720938 | 0.226369  | 1.545057  |
| H  | -3.721330 | -2.570273 | -1.588777 |
| H  | -6.020547 | -3.518788 | -1.474124 |
| H  | 1.015280  | 3.732484  | -1.965758 |
| H  | 3.253795  | 4.739514  | -1.743355 |
| H  | 4.734583  | 4.118429  | 0.167942  |
| H  | 3.924229  | 2.485736  | 1.875131  |
| H  | 1.661191  | 1.484694  | 1.665535  |
| H  | -2.809960 | 1.898900  | -1.870361 |
| H  | -4.669959 | 2.847582  | -0.171071 |
| H  | -3.319983 | 4.147200  | 1.808757  |
| H  | -0.890987 | 4.028066  | 1.328694  |
| H  | -0.962641 | 3.644889  | -1.240415 |
| P  | 2.968305  | -2.435215 | 0.087460  |
| C  | 2.655083  | -4.030666 | -0.740286 |
| C  | 4.513056  | -1.831593 | -0.674106 |
| C  | 3.461171  | -2.900894 | 1.782094  |
| H  | 2.436140  | -3.858620 | -1.808901 |
| H  | 1.781024  | -4.523960 | -0.279544 |
| H  | 4.831963  | -0.898497 | -0.175788 |
| H  | 4.338598  | -1.612998 | -1.742635 |
| H  | 3.537248  | -4.691892 | -0.650521 |
| H  | 5.314437  | -2.588783 | -0.581710 |
| H  | 4.307164  | -3.613330 | 1.757331  |
| H  | 3.761925  | -1.997798 | 2.342353  |
| H  | 2.606624  | -3.367169 | 2.303698  |

4a.  
 SCF Energy: -1421.01050944  
 ZPE-corrected Energy: -1420.60963  
 $\Delta U$ : -1420.58211  
 $\Delta H$ : -1420.58116  
 $\Delta G$ : -1420.67233

Num. Imaginary Frequencies: 0

|    |           |           |           |
|----|-----------|-----------|-----------|
| N  | 0.797088  | 3.056052  | 1.783662  |
| C  | 0.112860  | 2.066572  | 1.095216  |
| C  | -0.943039 | 1.664320  | 1.926317  |
| C  | -0.877507 | 2.423285  | 3.104394  |
| C  | 0.205551  | 3.285748  | 2.975462  |
| C  | 0.515791  | 1.641231  | -0.215998 |
| C  | 1.853416  | 2.059709  | -0.707498 |
| C  | 1.983938  | 2.677790  | -1.958518 |
| C  | 3.238151  | 3.063128  | -2.426981 |
| C  | 4.376030  | 2.826075  | -1.657864 |
| C  | 4.257769  | 2.207783  | -0.412039 |
| C  | 3.005607  | 1.832969  | 0.064633  |
| C  | -0.308304 | 0.909216  | -1.093925 |
| Au | 0.711806  | -0.950340 | -0.222256 |
| C  | -1.702951 | 0.691679  | -0.923161 |
| C  | -2.902606 | 0.497150  | -0.816609 |
| C  | -4.302096 | 0.284999  | -0.653910 |
| C  | -4.984629 | 0.867764  | 0.429996  |
| C  | -6.348791 | 0.654356  | 0.595005  |
| C  | -7.051043 | -0.137190 | -0.315275 |
| C  | -6.382909 | -0.716562 | -1.395181 |
| C  | -5.018560 | -0.509821 | -1.567064 |
| H  | -8.126265 | -0.302141 | -0.183132 |
| H  | -6.871595 | 1.112666  | 1.441994  |
| H  | -4.429732 | 1.494690  | 1.137954  |
| H  | -4.488855 | -0.963432 | -2.412427 |
| H  | -6.932561 | -1.337251 | -2.111695 |
| H  | 1.089947  | 2.880483  | -2.559978 |
| H  | 3.324980  | 3.556167  | -3.401368 |
| H  | 5.362127  | 3.125154  | -2.030114 |
| H  | 5.150381  | 2.011391  | 0.191949  |
| H  | 2.916597  | 1.331880  | 1.037702  |
| H  | -1.658755 | 0.872959  | 1.698037  |
| H  | -1.543061 | 2.357413  | 3.966125  |
| H  | 0.586052  | 4.050264  | 3.654058  |
| H  | 1.588549  | 3.577806  | 1.413563  |
| H  | 0.072863  | 0.790586  | -2.122052 |
| P  | 1.683496  | -2.936182 | 0.532341  |
| C  | 3.356602  | -2.652500 | 1.189396  |
| C  | 0.759736  | -3.756755 | 1.866512  |
| C  | 1.879595  | -4.200196 | -0.759832 |
| H  | 3.305959  | -1.956698 | 2.045601  |
| H  | 3.988424  | -2.200765 | 0.404055  |
| H  | -0.251977 | -4.018642 | 1.510081  |
| H  | 0.665888  | -3.076571 | 2.730711  |
| H  | 3.807008  | -3.607742 | 1.518003  |
| H  | 1.287001  | -4.677390 | 2.179098  |
| H  | 2.356562  | -5.101516 | -0.331010 |
| H  | 0.891374  | -4.470229 | -1.171199 |
| H  | 2.508702  | -3.806314 | -1.576952 |

4a  
SCF Energy: -1421.00959486  
ZPE-corrected Energy: -1420.60912  
 $\Delta U$ : -1420.58149  
 $\Delta H$ : -1420.58055  
 $\Delta G$ : -1420.67266

Num. Imaginary Frequencies: 0

|    |           |           |           |
|----|-----------|-----------|-----------|
| C  | 2.649040  | 3.522316  | 1.692552  |
| C  | 3.593617  | 2.730789  | 2.327288  |
| N  | 3.705468  | 1.566201  | 1.640740  |
| C  | 2.830444  | 1.559125  | 0.570772  |
| C  | 2.166569  | 2.787367  | 0.590465  |
| C  | 2.731140  | 0.437375  | -0.335065 |
| C  | 3.920335  | -0.420517 | -0.528750 |
| C  | 3.791766  | -1.815501 | -0.617688 |
| C  | 4.908705  | -2.619690 | -0.825158 |
| C  | 6.172534  | -2.043017 | -0.953058 |
| C  | 6.314316  | -0.658066 | -0.867435 |
| C  | 5.199569  | 0.146939  | -0.651249 |
| H  | 2.355609  | 4.530682  | 1.989010  |
| H  | 4.194440  | 2.917959  | 3.218275  |
| H  | 4.304894  | 0.786979  | 1.901830  |
| H  | 1.448710  | 3.128469  | -0.158378 |
| H  | 2.803037  | -2.274659 | -0.495732 |
| H  | 4.792651  | -3.707885 | -0.880494 |
| H  | 7.051534  | -2.676399 | -1.117242 |
| H  | 7.303193  | -0.198698 | -0.975429 |
| H  | 5.315724  | 1.236280  | -0.602213 |
| C  | 1.585354  | 0.141357  | -1.031690 |
| C  | 0.343513  | 0.781142  | -0.856829 |
| C  | -0.745593 | 1.365409  | -0.722074 |
| C  | -1.799071 | 2.344120  | -0.681734 |
| C  | -2.855432 | 2.297384  | -1.607721 |
| C  | -3.852324 | 3.265632  | -1.573051 |
| C  | -3.811900 | 4.281352  | -0.616006 |
| C  | -2.770423 | 4.326056  | 0.311416  |
| C  | -1.767706 | 3.361773  | 0.286562  |
| H  | -2.878740 | 1.496975  | -2.356884 |
| H  | -4.670242 | 3.228844  | -2.300948 |
| H  | -4.600095 | 5.041950  | -0.591161 |
| H  | -2.739826 | 5.119987  | 1.065740  |
| H  | -0.951893 | 3.385026  | 1.018482  |
| Au | -1.379389 | -0.736971 | -0.081325 |
| H  | 1.623071  | -0.652418 | -1.790229 |
| P  | -2.478986 | -2.662524 | 0.643842  |
| C  | -3.878182 | -3.137237 | -0.416040 |
| C  | -1.401041 | -4.126137 | 0.711531  |
| C  | -3.180119 | -2.496801 | 2.313091  |
| H  | -3.524025 | -3.321584 | -1.445170 |
| H  | -4.621495 | -2.321116 | -0.437696 |
| H  | -0.554606 | -3.936134 | 1.394586  |
| H  | -1.002551 | -4.342350 | -0.295101 |
| H  | -1.975188 | -4.999311 | 1.073789  |
| H  | -4.353518 | -4.054861 | -0.021764 |
| H  | -3.694014 | -3.433555 | 2.598667  |
| H  | -2.375800 | -2.283257 | 3.038342  |
| H  | -3.903334 | -1.662814 | 2.330812  |

5a  
 SCF Energy: -1421.02581496  
 ZPE-corrected Energy: -1420.62347  
 $\Delta U$ : -1420.59741  
 $\Delta H$ : -1420.59647  
 $\Delta G$ : -1420.68255

Num. Imaginary Frequencies: 0

|    |           |           |           |
|----|-----------|-----------|-----------|
| C  | 2.405666  | 3.480256  | 0.114848  |
| C  | 3.720543  | 3.344153  | 0.373725  |
| N  | 4.096058  | 2.000680  | 0.254310  |
| C  | 3.047631  | 1.239918  | -0.072046 |
| C  | 1.895649  | 2.136297  | -0.291362 |
| C  | 2.926963  | -0.158147 | -0.156507 |
| C  | 4.098602  | -1.052061 | -0.062980 |
| C  | 4.067171  | -2.183415 | 0.764899  |
| C  | 5.167245  | -3.033027 | 0.846062  |
| C  | 6.317929  | -2.763907 | 0.105009  |
| C  | 6.361361  | -1.642232 | -0.722115 |
| C  | 5.260187  | -0.792992 | -0.806767 |
| H  | 1.844745  | 4.414524  | 0.079848  |
| H  | 4.471101  | 4.092767  | 0.629303  |
| H  | 5.035000  | 1.644483  | 0.433166  |
| H  | 1.912090  | 2.216295  | -1.420198 |
| H  | 3.174602  | -2.386792 | 1.369158  |
| H  | 5.128669  | -3.909699 | 1.502341  |
| H  | 7.184439  | -3.431124 | 0.172574  |
| H  | 7.257517  | -1.430089 | -1.315902 |
| H  | 5.291517  | 0.068118  | -1.487174 |
| C  | 1.619169  | -0.627153 | -0.220714 |
| C  | 0.418010  | 0.157958  | -0.177526 |
| C  | 0.533537  | 1.531411  | -0.146815 |
| C  | -0.621051 | 2.447205  | -0.103864 |
| C  | -1.687370 | 2.327088  | -1.009593 |
| C  | -2.795840 | 3.164514  | -0.913268 |
| C  | -2.861173 | 4.127673  | 0.094672  |
| C  | -1.806845 | 4.259200  | 0.998150  |
| C  | -0.689775 | 3.434453  | 0.891027  |
| H  | -1.630927 | 1.577998  | -1.808839 |
| H  | -3.615111 | 3.067353  | -1.634919 |
| H  | -3.736400 | 4.782503  | 0.172943  |
| H  | -1.854951 | 5.009644  | 1.795156  |
| H  | 0.128204  | 3.531632  | 1.616075  |
| Au | -1.444979 | -0.799128 | -0.048704 |
| H  | 1.506627  | -1.719973 | -0.267599 |
| P  | -3.591680 | -1.816641 | 0.097903  |
| C  | -4.613527 | -1.552219 | -1.392179 |
| C  | -3.625138 | -3.624102 | 0.347238  |
| C  | -4.623990 | -1.159032 | 1.452526  |
| H  | -4.117945 | -2.003665 | -2.270009 |
| H  | -4.724624 | -0.467656 | -1.573316 |
| H  | -3.107283 | -3.880152 | 1.288463  |
| H  | -3.102165 | -4.124916 | -0.486638 |
| H  | -4.668661 | -3.988061 | 0.394707  |
| H  | -5.614533 | -2.005553 | -1.264483 |
| H  | -5.623045 | -1.634312 | 1.445902  |
| H  | -4.134223 | -1.351498 | 2.423573  |
| H  | -4.738204 | -0.066871 | 1.330261  |



6a  
SCF Energy: -1421.01284187  
ZPE-corrected Energy: -1420.61113  
 $\Delta U$ : -1420.58464  
 $\Delta H$ : -1420.58370  
 $\Delta G$ : -1420.67195

Num. Imaginary Frequencies: 0

|    |           |           |           |
|----|-----------|-----------|-----------|
| C  | 2.232469  | 3.200516  | 0.671406  |
| C  | 2.031805  | 1.986351  | -0.178473 |
| C  | 3.496982  | 3.155947  | 1.133850  |
| N  | 4.114934  | 1.938138  | 0.756715  |
| C  | 3.249201  | 1.196633  | 0.079640  |
| C  | 0.953613  | 0.902980  | -0.224352 |
| C  | 1.680773  | -0.330007 | -0.315028 |
| C  | 3.057769  | -0.187231 | -0.176521 |
| C  | -0.400544 | 1.068989  | -0.197313 |
| C  | -0.936732 | 2.438083  | -0.219568 |
| C  | -1.739309 | 2.905908  | 0.834854  |
| C  | -2.185102 | 4.224604  | 0.857507  |
| C  | -1.877692 | 5.089473  | -0.194231 |
| C  | -1.118701 | 4.625289  | -1.268802 |
| C  | -0.643979 | 3.315997  | -1.277678 |
| Au | -1.747071 | -0.520990 | -0.047065 |
| P  | -3.323544 | -2.305692 | 0.103487  |
| C  | -2.849294 | -3.812054 | -0.811179 |
| C  | -4.981211 | -1.897237 | -0.539991 |
| C  | -3.636337 | -2.897910 | 1.801239  |
| H  | 5.010599  | 1.614108  | 1.121808  |
| H  | 1.543669  | 4.043540  | 0.758988  |
| H  | 2.126255  | 2.346947  | -1.234810 |
| H  | 4.070254  | 3.888622  | 1.703631  |
| H  | 1.175760  | -1.289049 | -0.487971 |
| C  | 4.087946  | -1.225512 | -0.150780 |
| H  | -1.993200 | 2.222381  | 1.655446  |
| H  | -2.788987 | 4.579078  | 1.700839  |
| H  | -2.241943 | 6.122963  | -0.182290 |
| H  | -0.890898 | 5.291302  | -2.109160 |
| H  | -0.053331 | 2.956101  | -2.129879 |
| H  | -3.626437 | -4.591439 | -0.699688 |
| H  | -2.723727 | -3.573652 | -1.882196 |
| H  | -1.889386 | -4.196901 | -0.423411 |
| H  | -5.658765 | -2.766007 | -0.441720 |
| H  | -5.399097 | -1.043707 | 0.022495  |
| H  | -4.906833 | -1.611369 | -1.604143 |
| H  | -4.376147 | -3.720386 | 1.792914  |
| H  | -2.693920 | -3.260456 | 2.248496  |
| H  | -4.020568 | -2.068090 | 2.420476  |
| C  | 3.769788  | -2.554180 | 0.170719  |
| C  | 5.421181  | -0.905814 | -0.451459 |
| C  | 6.410486  | -1.885409 | -0.424598 |
| C  | 6.082073  | -3.201396 | -0.102645 |
| C  | 4.758310  | -3.532256 | 0.192289  |
| H  | 2.737188  | -2.820897 | 0.425533  |
| H  | 5.685913  | 0.119342  | -0.741824 |
| H  | 7.445417  | -1.619082 | -0.666300 |
| H  | 6.859524  | -3.973144 | -0.081723 |
| H  | 4.494872  | -4.564157 | 0.449976  |

7a1  
 SCF Energy: -1420.96868542  
 ZPE-corrected Energy: -1420.56870  
 $\Delta U$ : -1420.54132  
 $\Delta H$ : -1420.54038  
 $\Delta G$ : -1420.63088

Num. Imaginary Frequencies: 0

|    |           |           |           |
|----|-----------|-----------|-----------|
| C  | 2.779573  | 3.200221  | 2.177213  |
| C  | 2.912983  | 2.638661  | 0.932425  |
| C  | 1.494891  | 2.833781  | 2.651351  |
| N  | 0.884161  | 2.083022  | 1.754543  |
| C  | 1.717380  | 1.897040  | 0.624686  |
| C  | 1.124633  | 1.902868  | -0.825275 |
| C  | 1.646220  | 0.634446  | -0.272173 |
| C  | 2.947032  | 0.113621  | -0.770691 |
| C  | 3.856066  | -0.490498 | 0.111884  |
| C  | 5.055034  | -1.018360 | -0.353482 |
| C  | 5.364219  | -0.967470 | -1.715812 |
| C  | 4.464151  | -0.381156 | -2.602129 |
| C  | 3.265494  | 0.159348  | -2.133256 |
| Au | 0.184075  | -0.841751 | 0.243660  |
| P  | -1.586638 | -2.347288 | 0.699357  |
| C  | -3.034672 | -1.496650 | 1.415505  |
| C  | -2.252970 | -3.184299 | -0.777451 |
| C  | -1.226728 | -3.700468 | 1.866945  |
| C  | -0.297040 | 2.070706  | -0.943251 |
| C  | -1.513230 | 2.046131  | -0.969587 |
| C  | -2.928354 | 1.854098  | -0.992694 |
| C  | -3.462989 | 0.804117  | -1.761741 |
| C  | -4.830158 | 0.548362  | -1.745136 |
| C  | -5.678714 | 1.331865  | -0.960882 |
| C  | -5.156634 | 2.378008  | -0.198970 |
| C  | -3.790483 | 2.643277  | -0.214123 |
| H  | 3.499103  | 3.817148  | 2.715727  |
| H  | 3.768990  | 2.707249  | 0.256500  |
| H  | 1.014449  | 3.092022  | 3.597897  |
| H  | 3.609012  | -0.537197 | 1.181768  |
| H  | 5.756901  | -1.478806 | 0.351603  |
| H  | 6.307072  | -1.388172 | -2.083235 |
| H  | 4.694792  | -0.339265 | -3.673010 |
| H  | 2.559207  | 0.611834  | -2.840880 |
| H  | -3.855296 | -2.216669 | 1.594525  |
| H  | -2.753733 | -1.021149 | 2.372082  |
| H  | -3.385492 | -0.710862 | 0.719630  |
| H  | -1.461852 | -3.788445 | -1.255455 |
| H  | -3.096570 | -3.842544 | -0.496683 |
| H  | -2.605730 | -2.429106 | -1.502780 |
| H  | -0.414795 | -4.331821 | 1.465134  |
| H  | -0.898730 | -3.280826 | 2.834309  |
| H  | -2.128298 | -4.321855 | 2.024621  |
| H  | -2.786258 | 0.192198  | -2.370882 |
| H  | -5.238354 | -0.270950 | -2.347763 |
| H  | -6.755129 | 1.127463  | -0.945718 |
| H  | -5.822688 | 2.995109  | 0.414344  |
| H  | -3.375886 | 3.461983  | 0.384722  |
| H  | -0.052780 | 1.686070  | 1.838100  |
| H  | 1.756393  | 2.487165  | -1.516026 |

7a

SCF Energy: -1420.95927887

ZPE-corrected Energy: -1420.55847

$\Delta U$ : -1420.53110

$\Delta H$ : -1420.53016

$\Delta G$ : -1420.62046

Num. Imaginary Frequencies: 0

|    |           |           |           |
|----|-----------|-----------|-----------|
| C  | 3.556939  | 3.627139  | 0.886702  |
| C  | 2.217218  | 3.420583  | 0.962347  |
| C  | 3.978582  | 3.135506  | -0.388458 |
| N  | 2.963154  | 2.638897  | -1.042845 |
| C  | 1.727636  | 2.803669  | -0.295527 |
| C  | 0.811724  | 1.573828  | -0.175168 |
| C  | 1.245826  | 0.290714  | -0.079676 |
| C  | 2.685314  | -0.009952 | -0.014422 |
| C  | 3.407728  | 0.227736  | 1.164682  |
| C  | 4.784487  | 0.016922  | 1.208191  |
| C  | 5.461804  | -0.444265 | 0.078408  |
| C  | 4.745539  | -0.726015 | -1.087193 |
| C  | 3.368234  | -0.527396 | -1.128931 |
| Au | -0.080173 | -1.327000 | -0.011955 |
| P  | -1.555090 | -3.198670 | 0.069467  |
| C  | -3.322887 | -2.771037 | 0.224850  |
| C  | -1.491180 | -4.277973 | -1.401219 |
| C  | -1.253296 | -4.334789 | 1.465853  |
| C  | -0.571060 | 1.920010  | -0.144382 |
| C  | -1.746615 | 2.244624  | -0.110035 |
| C  | -3.136310 | 2.559356  | -0.065606 |
| C  | -4.079232 | 1.535944  | 0.142325  |
| C  | -5.437737 | 1.829478  | 0.184736  |
| C  | -5.877179 | 3.144499  | 0.022917  |
| C  | -4.949567 | 4.166814  | -0.182588 |
| C  | -3.588938 | 3.880875  | -0.228178 |
| H  | 4.214861  | 4.073243  | 1.633050  |
| H  | 1.547029  | 3.677066  | 1.787197  |
| H  | 4.984876  | 3.141764  | -0.817264 |
| H  | 2.877718  | 0.594359  | 2.053534  |
| H  | 5.336072  | 0.216729  | 2.134515  |
| H  | 6.545250  | -0.605344 | 0.112259  |
| H  | 5.266896  | -1.108399 | -1.972505 |
| H  | 2.803046  | -0.750075 | -2.044034 |
| H  | -3.940108 | -3.688411 | 0.262415  |
| H  | -3.484602 | -2.185674 | 1.147567  |
| H  | -3.634949 | -2.157854 | -0.639285 |
| H  | -0.467548 | -4.672418 | -1.528860 |
| H  | -2.196794 | -5.123002 | -1.291562 |
| H  | -1.756251 | -3.695843 | -2.301615 |
| H  | -0.224782 | -4.732688 | 1.406745  |
| H  | -1.362432 | -3.788753 | 2.419634  |
| H  | -1.972376 | -5.175126 | 1.441872  |
| H  | -3.726195 | 0.505398  | 0.269569  |
| H  | -6.162997 | 1.023969  | 0.346557  |
| H  | -6.948231 | 3.373659  | 0.057103  |
| H  | -5.291455 | 5.200214  | -0.309889 |
| H  | -2.858069 | 4.681177  | -0.391349 |
| H  | 3.005637  | 2.234311  | -1.979501 |
| H  | 1.141129  | 3.584870  | -0.831562 |

8a.

SCF Energy: -1421.00383774  
ZPE-corrected Energy: -1420.60262  
 $\Delta U$ : -1420.57519  
 $\Delta H$ : -1420.57425  
 $\Delta G$ : -1420.66535

Num. Imaginary Frequencies: 0

|    |           |           |           |
|----|-----------|-----------|-----------|
| C  | 0.178296  | 3.390198  | 3.150574  |
| C  | -0.557454 | 2.628375  | 2.232778  |
| C  | 1.468748  | 3.494825  | 2.643286  |
| N  | 1.533920  | 2.821677  | 1.473515  |
| C  | 0.299406  | 2.272866  | 1.181528  |
| C  | -0.034891 | 1.530256  | -0.001707 |
| C  | 0.831268  | 1.042885  | -1.008922 |
| C  | 2.268279  | 1.381053  | -1.188180 |
| C  | 3.273966  | 1.018306  | -0.276129 |
| C  | 4.604088  | 1.365735  | -0.503656 |
| C  | 4.959472  | 2.067075  | -1.655757 |
| C  | 3.975618  | 2.412717  | -2.581119 |
| C  | 2.645348  | 2.069387  | -2.351204 |
| Au | 0.620897  | -1.033339 | -0.104574 |
| P  | 0.538380  | -3.266786 | 0.607029  |
| C  | 0.305358  | -3.452447 | 2.402415  |
| C  | -0.820495 | -4.204524 | -0.157543 |
| C  | 2.045292  | -4.208763 | 0.217175  |
| C  | -1.433385 | 1.314899  | -0.191313 |
| C  | -2.630141 | 1.158364  | -0.357832 |
| C  | -4.031669 | 0.983747  | -0.534407 |
| C  | -4.532176 | 0.300731  | -1.657586 |
| C  | -5.903098 | 0.135733  | -1.818392 |
| C  | -6.787144 | 0.646816  | -0.866524 |
| C  | -6.298597 | 1.325871  | 0.251053  |
| C  | -4.929533 | 1.495880  | 0.420212  |
| H  | -0.179351 | 3.825462  | 4.084368  |
| H  | -1.610204 | 2.346820  | 2.299548  |
| H  | 2.344240  | 4.009990  | 3.041325  |
| H  | 3.012557  | 0.446065  | 0.625034  |
| H  | 5.371690  | 1.072681  | 0.221334  |
| H  | 6.006260  | 2.335400  | -1.836426 |
| H  | 4.245152  | 2.956657  | -3.493445 |
| H  | 1.876071  | 2.344075  | -3.083542 |
| H  | 0.276627  | -4.524548 | 2.672919  |
| H  | 1.137177  | -2.962379 | 2.937976  |
| H  | -0.641657 | -2.973182 | 2.706324  |
| H  | -0.700893 | -4.200743 | -1.255118 |
| H  | -0.814051 | -5.248489 | 0.207792  |
| H  | -1.787091 | -3.733731 | 0.094033  |
| H  | 2.215525  | -4.203173 | -0.873651 |
| H  | 2.915701  | -3.744762 | 0.713114  |
| H  | 1.939022  | -5.253287 | 0.565399  |
| H  | -3.831196 | -0.096072 | -2.400436 |
| H  | -6.287877 | -0.396277 | -2.695387 |
| H  | -7.867061 | 0.515188  | -0.997291 |
| H  | -6.993227 | 1.727087  | 0.997121  |
| H  | -4.536157 | 2.028309  | 1.293948  |
| H  | 2.359340  | 2.761565  | 0.879632  |
| H  | 0.306061  | 0.831238  | -1.955790 |

8a  
SCF Energy: -1421.00218480  
ZPE-corrected Energy: -1420.60190  
 $\Delta U$ : -1420.57420  
 $\Delta H$ : -1420.57325  
 $\Delta G$ : -1420.66518

Num. Imaginary Frequencies: 0

|    |           |           |           |
|----|-----------|-----------|-----------|
| Au | 1.230431  | -0.817336 | -0.002279 |
| P  | 1.889308  | -3.065829 | -0.065108 |
| C  | 2.778279  | -3.545313 | -1.576409 |
| C  | 2.966242  | -3.566196 | 1.310539  |
| C  | 0.438609  | -4.161000 | 0.017891  |
| H  | 3.023280  | -4.623280 | -1.537924 |
| H  | 2.149546  | -3.343266 | -2.460943 |
| H  | 3.711236  | -2.961608 | -1.663727 |
| H  | 2.457900  | -3.378238 | 2.272083  |
| H  | 3.205235  | -4.642589 | 1.224760  |
| H  | 3.902242  | -2.981579 | 1.284060  |
| H  | -0.116296 | -3.975064 | 0.954802  |
| H  | -0.231195 | -3.954010 | -0.835568 |
| H  | 0.759461  | -5.218913 | -0.015539 |
| C  | 2.217423  | 2.304317  | 0.063211  |
| C  | 3.438842  | 1.886771  | -0.490895 |
| C  | 4.543041  | 2.730885  | -0.452280 |
| C  | 4.439901  | 3.995309  | 0.128819  |
| C  | 3.227320  | 4.418849  | 0.675398  |
| C  | 2.119296  | 3.580569  | 0.648990  |
| H  | 3.514471  | 0.898421  | -0.959933 |
| H  | 5.493407  | 2.400712  | -0.885169 |
| H  | 5.312208  | 4.657657  | 0.154656  |
| H  | 3.145383  | 5.411907  | 1.130335  |
| H  | 1.163337  | 3.901268  | 1.078867  |
| C  | -2.816963 | 4.332341  | -0.538621 |
| C  | -1.820071 | 3.344181  | -0.723047 |
| C  | -3.803093 | 3.770654  | 0.250310  |
| N  | -3.440408 | 2.488736  | 0.538810  |
| C  | -2.234439 | 2.198409  | -0.054313 |
| C  | -1.555016 | 0.910954  | 0.093102  |
| C  | -2.130675 | -0.315108 | 0.260940  |
| C  | -3.527648 | -0.714415 | 0.119806  |
| C  | -4.424616 | -0.088998 | -0.767057 |
| C  | -5.731274 | -0.547846 | -0.892414 |
| C  | -6.173939 | -1.636483 | -0.137894 |
| C  | -5.291706 | -2.279484 | 0.730105  |
| C  | -3.980304 | -1.830176 | 0.847218  |
| C  | -0.126609 | 1.057231  | 0.110069  |
| C  | 1.035342  | 1.494682  | 0.037478  |
| H  | -2.815833 | 5.348611  | -0.936176 |
| H  | -0.894519 | 3.438376  | -1.296651 |
| H  | -4.732815 | 4.190186  | 0.636743  |
| H  | -4.084571 | 0.750315  | -1.384794 |
| H  | -6.412371 | -0.054838 | -1.595304 |
| H  | -7.205858 | -1.991424 | -0.237497 |
| H  | -5.626348 | -3.143088 | 1.315771  |
| H  | -3.283471 | -2.345429 | 1.520634  |
| H  | -3.973048 | 1.846297  | 1.119037  |
| H  | -1.449802 | -1.135389 | 0.536757  |

9a  
SCF Energy: -1421.00486020  
ZPE-corrected Energy: -1420.60260  
 $\Delta U$ : -1420.57629  
 $\Delta H$ : -1420.57534  
 $\Delta G$ : -1420.66243

Num. Imaginary Frequencies: 0

|    |           |           |           |
|----|-----------|-----------|-----------|
| C  | -1.181845 | 2.709577  | 0.056212  |
| C  | -2.317103 | 2.216459  | -0.613760 |
| C  | -3.520890 | 2.912426  | -0.591824 |
| C  | -3.621003 | 4.127802  | 0.088304  |
| C  | -2.500590 | 4.643276  | 0.738126  |
| C  | -1.295033 | 3.946390  | 0.715590  |
| H  | -2.240927 | 1.277638  | -1.177448 |
| H  | -4.389824 | 2.507851  | -1.124121 |
| H  | -4.569017 | 4.677319  | 0.101427  |
| H  | -2.564063 | 5.599006  | 1.270774  |
| H  | -0.431224 | 4.366139  | 1.246282  |
| Au | -1.147466 | -0.874265 | 0.016210  |
| P  | -2.896629 | -2.494966 | 0.021722  |
| C  | -4.541577 | -1.708197 | -0.082142 |
| C  | -2.884199 | -3.680281 | -1.366538 |
| C  | -3.000951 | -3.552345 | 1.505582  |
| H  | -5.344017 | -2.469806 | -0.080033 |
| H  | -4.681085 | -1.028002 | 0.777397  |
| H  | -4.606888 | -1.112222 | -1.010562 |
| H  | -1.954870 | -4.276340 | -1.340504 |
| H  | -3.754610 | -4.360038 | -1.302112 |
| H  | -2.920422 | -3.131377 | -2.324274 |
| H  | -2.075043 | -4.145690 | 1.606444  |
| H  | -3.110935 | -2.920924 | 2.404942  |
| H  | -3.866846 | -4.236876 | 1.431996  |
| C  | 1.967995  | 3.909932  | -0.430837 |
| C  | 1.400532  | 2.721850  | 0.280983  |
| C  | 3.176964  | 3.558016  | -0.902431 |
| N  | 3.399457  | 2.177156  | -0.651501 |
| C  | 2.368333  | 1.654235  | -0.027998 |
| C  | 1.755169  | 0.348178  | 0.054109  |
| C  | 2.352494  | -0.877188 | 0.019107  |
| C  | 3.764021  | -1.201419 | 0.110003  |
| C  | 4.695463  | -0.389907 | 0.786216  |
| C  | 6.041551  | -0.734445 | 0.821263  |
| C  | 6.483790  | -1.901601 | 0.194443  |
| C  | 5.568215  | -2.733793 | -0.451326 |
| C  | 4.220625  | -2.394540 | -0.481805 |
| C  | 0.300785  | 0.624879  | 0.026334  |
| C  | 0.085102  | 1.978939  | 0.066078  |
| H  | 1.545863  | 4.916337  | -0.440536 |
| H  | 1.501510  | 2.946220  | 1.374866  |
| H  | 3.951593  | 4.137903  | -1.405757 |
| H  | 4.353191  | 0.498562  | 1.331201  |
| H  | 6.751797  | -0.097783 | 1.360211  |
| H  | 7.544710  | -2.173103 | 0.227232  |
| H  | 5.908585  | -3.658919 | -0.929240 |
| H  | 3.498918  | -3.049628 | -0.984637 |
| H  | 4.182602  | 1.645952  | -1.039365 |
| H  | 1.666976  | -1.730374 | -0.102236 |

AuPMe3  
SCF Energy: -596.392670308  
ZPE-corrected Energy: -596.279720  
 $\Delta U$ : -596.271299  
 $\Delta H$ : -596.270354  
 $\Delta G$ : -596.314078

Num. Imaginary Frequencies: 0

|    |           |           |           |
|----|-----------|-----------|-----------|
| P  | -1.330080 | 0.000581  | 0.000447  |
| C  | -2.016572 | -1.078279 | 1.285961  |
| C  | -2.015855 | -0.576164 | -1.576022 |
| C  | -2.015410 | 1.654267  | 0.289303  |
| Au | 0.957729  | -0.000084 | 0.000021  |
| H  | -1.678594 | 0.081489  | -2.395801 |
| H  | -1.674770 | -1.605853 | -1.779808 |
| H  | -3.120636 | -0.558508 | -1.520007 |
| H  | -1.675747 | 2.344250  | -0.502384 |
| H  | -3.120354 | 1.599223  | 0.280273  |
| H  | -1.675340 | 2.036014  | 1.267261  |
| H  | -1.679001 | -0.740251 | 2.280749  |
| H  | -3.121345 | -1.041207 | 1.239614  |
| H  | -1.676568 | -2.116166 | 1.126329  |

P1  
SCF Energy: -824.671903421  
ZPE-corrected Energy: -824.381411  
 $\Delta U$ : -824.365799  
 $\Delta H$ : -824.364855  
 $\Delta G$ : -824.425177

Num. Imaginary Frequencies: 0

|   |           |           |           |
|---|-----------|-----------|-----------|
| C | -1.100756 | 2.239206  | -0.015892 |
| C | 0.061268  | 2.966260  | 0.001981  |
| N | 1.138864  | 2.116151  | 0.010366  |
| C | 0.693795  | 0.814844  | -0.001121 |
| C | -0.727676 | 0.853151  | -0.005133 |
| C | 1.430315  | -0.385173 | 0.001156  |
| C | 2.907675  | -0.413027 | 0.006668  |
| C | 3.599531  | -1.287976 | 0.858339  |
| C | 4.991344  | -1.335023 | 0.858881  |
| C | 5.722765  | -0.506665 | 0.007500  |
| C | 5.049649  | 0.364945  | -0.847861 |
| C | 3.656727  | 0.410533  | -0.849157 |
| H | -2.109918 | 2.652769  | -0.044170 |
| H | 0.211836  | 4.047175  | 0.005545  |
| H | 2.111144  | 2.402226  | 0.069093  |
| H | 3.031161  | -1.928938 | 1.543601  |
| H | 5.511068  | -2.021756 | 1.537164  |
| H | 6.818211  | -0.541746 | 0.009416  |
| H | 5.613965  | 1.010583  | -1.530828 |
| H | 3.138955  | 1.074397  | -1.553298 |
| C | 0.676464  | -1.558643 | 0.003416  |
| C | -0.726255 | -1.545793 | -0.010370 |
| C | -1.459065 | -0.359028 | -0.010895 |
| C | -2.936697 | -0.386409 | -0.013070 |
| C | -3.632883 | -1.285044 | -0.836560 |
| C | -5.024850 | -1.334441 | -0.829063 |
| C | -5.752695 | -0.486485 | 0.005547  |
| C | -5.075144 | 0.409063  | 0.832991  |
| C | -3.682874 | 0.459462  | 0.822582  |
| H | -3.069005 | -1.942794 | -1.509636 |
| H | -5.546772 | -2.039097 | -1.487164 |
| H | -6.848169 | -0.524090 | 0.012087  |
| H | -5.636924 | 1.072251  | 1.501332  |
| H | -3.159323 | 1.148100  | 1.496726  |
| H | -1.263042 | -2.502430 | 0.000750  |
| H | 1.200933  | -2.522239 | -0.002815 |

P2

SCF Energy: -824.618672133  
ZPE-corrected Energy: -824.329360  
 $\Delta U$ : -824.313381  
 $\Delta H$ : -824.312437  
 $\Delta G$ : -824.374062

Num. Imaginary Frequencies: 0

|   |           |           |           |
|---|-----------|-----------|-----------|
| C | 1.012075  | 2.181173  | -0.396754 |
| C | 0.439277  | 0.904937  | -0.127235 |
| C | -0.043652 | 3.061636  | -0.551043 |
| N | -1.229564 | 2.376303  | -0.394159 |
| C | -0.941703 | 1.069947  | -0.140638 |
| C | 0.683917  | -0.535469 | 0.019920  |
| C | -0.649456 | -1.154057 | 0.069513  |
| C | -1.636597 | -0.207762 | -0.007410 |
| C | 1.815048  | -1.286837 | 0.072357  |
| C | 3.208216  | -0.863590 | 0.109968  |
| C | 4.200547  | -1.745120 | -0.356012 |
| C | 5.543748  | -1.383303 | -0.344429 |
| C | 5.927616  | -0.138558 | 0.156438  |
| C | 4.958419  | 0.734196  | 0.654758  |
| C | 3.614141  | 0.376474  | 0.633613  |
| H | 1.662963  | -2.377437 | 0.067768  |
| H | -2.152926 | 2.785320  | -0.500659 |
| H | 2.065348  | 2.455458  | -0.481619 |
| H | -0.044764 | 4.134458  | -0.749024 |
| H | -0.798874 | -2.228583 | 0.219722  |
| C | -3.082355 | -0.414368 | 0.045197  |
| H | 3.900749  | -2.727525 | -0.742688 |
| H | 6.299800  | -2.080401 | -0.723738 |
| H | 6.985789  | 0.146549  | 0.172313  |
| H | 5.256105  | 1.701854  | 1.075152  |
| H | 2.863087  | 1.048110  | 1.063340  |
| C | -3.654250 | -1.638789 | -0.340612 |
| C | -3.938449 | 0.604393  | 0.494605  |
| C | -5.316010 | 0.407676  | 0.558500  |
| C | -5.867834 | -0.813050 | 0.172719  |
| C | -5.029326 | -1.836109 | -0.275419 |
| H | -3.005688 | -2.439375 | -0.716458 |
| H | -3.514542 | 1.557341  | 0.835021  |
| H | -5.963571 | 1.215206  | 0.919228  |
| H | -6.951777 | -0.968336 | 0.218871  |
| H | -5.454987 | -2.797290 | -0.586340 |



P3

SCF Energy: -824.618234218  
ZPE-corrected Energy: -824.329087  
 $\Delta U$ : -824.313065  
 $\Delta H$ : -824.312121  
 $\Delta G$ : -824.374064

Num. Imaginary Frequencies: 0

|   |           |           |           |
|---|-----------|-----------|-----------|
| C | -3.112585 | -0.378243 | 0.038218  |
| C | -3.695794 | -1.627678 | -0.238261 |
| C | -5.073716 | -1.802718 | -0.180257 |
| C | -5.906440 | -0.731799 | 0.153178  |
| C | -5.344535 | 0.514066  | 0.427692  |
| C | -3.963632 | 0.689207  | 0.368102  |
| H | -3.054042 | -2.470333 | -0.522299 |
| H | -5.506236 | -2.784667 | -0.405276 |
| H | -6.993023 | -0.869643 | 0.194995  |
| H | -5.987936 | 1.360862  | 0.693803  |
| H | -3.531566 | 1.668073  | 0.605649  |
| H | -0.880949 | -2.237352 | 0.235479  |
| C | -1.130134 | 2.476324  | -0.421648 |
| C | -0.959566 | 1.095337  | -0.144604 |
| C | 0.146450  | 3.007372  | -0.538686 |
| N | 1.070332  | 2.011674  | -0.347671 |
| C | 0.406197  | 0.841620  | -0.104625 |
| C | 0.645635  | -0.589479 | 0.038997  |
| C | 1.774616  | -1.343271 | 0.081157  |
| C | 3.162958  | -0.899829 | 0.115784  |
| C | 3.559392  | 0.297581  | 0.737944  |
| C | 4.895577  | 0.687304  | 0.749570  |
| C | 5.866357  | -0.113590 | 0.145890  |
| C | 5.493144  | -1.319268 | -0.449821 |
| C | 4.158848  | -1.713020 | -0.453722 |
| C | -0.707333 | -1.166848 | 0.083711  |
| C | -1.663559 | -0.192567 | -0.005051 |
| H | -2.055525 | 3.044144  | -0.538930 |
| H | 0.467784  | 4.031843  | -0.733200 |
| H | 2.811163  | 0.905018  | 1.262069  |
| H | 5.185387  | 1.619228  | 1.248645  |
| H | 6.917934  | 0.194696  | 0.154683  |
| H | 6.251860  | -1.961611 | -0.911425 |
| H | 3.868442  | -2.664420 | -0.917036 |
| H | 2.076652  | 2.133255  | -0.416950 |
| H | 1.626464  | -2.433818 | 0.062081  |

P4

SCF Energy: -824.562758701  
ZPE-corrected Energy: -824.274558  
 $\Delta U$ : -824.258091  
 $\Delta H$ : -824.257146  
 $\Delta G$ : -824.321257

Num. Imaginary Frequencies: 0

|   |           |           |           |
|---|-----------|-----------|-----------|
| C | 3.139428  | -0.874520 | -0.051332 |
| C | 3.915449  | -2.047129 | -0.026681 |
| C | 5.306430  | -1.993424 | -0.006780 |
| C | 5.960325  | -0.761430 | -0.013366 |
| C | 5.205586  | 0.413251  | -0.042399 |
| C | 3.815861  | 0.359008  | -0.061637 |
| H | 3.406189  | -3.019617 | -0.021628 |
| H | 5.886130  | -2.923862 | 0.013674  |
| H | 7.055318  | -0.715215 | 0.001906  |
| H | 5.708597  | 1.387463  | -0.051857 |
| H | 3.244006  | 1.292422  | -0.091587 |
| C | 1.684989  | -0.985294 | -0.067107 |
| C | 1.071699  | 2.845252  | 0.152304  |
| C | 0.691522  | 1.483766  | 0.049278  |
| C | -0.125788 | 3.547553  | 0.206912  |
| N | -1.201702 | 2.680047  | 0.140268  |
| C | -0.692779 | 1.427745  | 0.044541  |
| C | -0.737296 | -0.038144 | -0.033394 |
| C | -1.625520 | -1.048730 | -0.055554 |
| C | -3.080417 | -0.941283 | -0.058829 |
| C | -3.752386 | 0.235440  | -0.435675 |
| C | -5.141537 | 0.308174  | -0.407131 |
| C | -5.897442 | -0.796222 | -0.009522 |
| C | -5.247808 | -1.978744 | 0.345963  |
| C | -3.858059 | -2.050839 | 0.316184  |
| C | 0.774554  | 0.004656  | -0.028892 |
| H | 2.062784  | 3.302453  | 0.188463  |
| H | -0.297713 | 4.622130  | 0.290065  |
| H | -3.176025 | 1.095279  | -0.798106 |
| H | -5.642278 | 1.234928  | -0.711208 |
| H | -6.991675 | -0.738028 | 0.011365  |
| H | -5.831263 | -2.856163 | 0.648768  |
| H | -3.351892 | -2.983329 | 0.597295  |
| H | -2.176586 | 2.964156  | 0.191896  |
| H | -1.210592 | -2.067464 | -0.041714 |
| H | 1.286038  | -2.009995 | -0.110500 |

TS\_2a\_3a  
SCF Energy: -1420.92775904  
ZPE-corrected Energy: -1420.53041  
 $\Delta U$ : -1420.50227  
 $\Delta H$ : -1420.50133  
 $\Delta G$ : -1420.59481

Num. Imaginary Frequencies: 1

Imaginary Frequency: -455.6020

|    |           |           |           |
|----|-----------|-----------|-----------|
| N  | 2.158900  | 3.188453  | -0.794399 |
| C  | 0.840959  | 3.565044  | -0.651626 |
| C  | 0.704378  | 4.049387  | 0.663384  |
| C  | 1.934526  | 3.876887  | 1.315025  |
| C  | 2.811312  | 3.337782  | 0.381070  |
| C  | -0.359376 | 1.749338  | -0.239176 |
| C  | -1.695173 | 2.300347  | -0.211417 |
| C  | -2.366385 | 2.448139  | 1.014786  |
| C  | -3.664747 | 2.944146  | 1.042525  |
| C  | -4.301998 | 3.303385  | -0.147027 |
| C  | -3.640392 | 3.163120  | -1.367399 |
| C  | -2.341201 | 2.666390  | -1.402788 |
| C  | 0.382800  | 0.702985  | -0.147625 |
| Au | -1.018150 | -0.968153 | -0.002701 |
| C  | 1.711249  | 0.281674  | -0.140354 |
| C  | 2.841296  | -0.184712 | -0.131625 |
| C  | 4.185621  | -0.653820 | -0.101872 |
| C  | 5.048835  | -0.254190 | 0.935590  |
| C  | 6.363521  | -0.706679 | 0.965810  |
| C  | 6.837565  | -1.554983 | -0.035755 |
| C  | 5.988883  | -1.954962 | -1.069301 |
| C  | 4.670678  | -1.513508 | -1.104322 |
| H  | 7.874613  | -1.907885 | -0.010290 |
| H  | 7.026891  | -0.392954 | 1.779579  |
| H  | 4.670615  | 0.411008  | 1.720590  |
| H  | 3.999684  | -1.827647 | -1.911775 |
| H  | 6.358682  | -2.622004 | -1.856100 |
| H  | -1.853484 | 2.164780  | 1.942053  |
| H  | -4.185759 | 3.052862  | 1.999998  |
| H  | -5.324177 | 3.697007  | -0.121635 |
| H  | -4.142315 | 3.441191  | -2.300453 |
| H  | -1.818246 | 2.546320  | -2.359309 |
| H  | -0.213820 | 4.463328  | 1.086157  |
| H  | 2.168753  | 4.104242  | 2.355721  |
| H  | 3.850700  | 3.022128  | 0.490379  |
| H  | 2.562890  | 2.786868  | -1.636928 |
| H  | 0.237717  | 3.789099  | -1.534244 |
| P  | -2.372361 | -2.875305 | 0.170287  |
| C  | -1.735816 | -4.296061 | -0.773207 |
| C  | -2.552717 | -3.485832 | 1.876084  |
| C  | -4.074991 | -2.634870 | -0.428575 |
| H  | -0.728142 | -4.562608 | -0.408799 |
| H  | -1.665161 | -4.032061 | -1.842959 |
| H  | -3.015430 | -2.704546 | 2.504284  |
| H  | -1.558614 | -3.728362 | 2.290785  |
| H  | -2.410560 | -5.164260 | -0.653897 |
| H  | -3.186821 | -4.392104 | 1.891714  |
| H  | -4.651661 | -3.572851 | -0.321658 |
| H  | -4.564941 | -1.835560 | 0.154645  |
| H  | -4.057388 | -2.335582 | -1.491173 |

TS\_2a\_7a  
SCF Energy: -1420.93382454  
ZPE-corrected Energy: -1420.53654  
 $\Delta U$ : -1420.50851  
 $\Delta H$ : -1420.50756  
 $\Delta G$ : -1420.60137

Num. Imaginary Frequencies: 1

Imaginary Frequency: -402.0224

|    |           |           |           |
|----|-----------|-----------|-----------|
| N  | 2.618829  | 2.843782  | -1.227518 |
| C  | 1.519953  | 3.102598  | -0.436976 |
| C  | 1.999854  | 3.269582  | 0.878632  |
| C  | 3.368019  | 2.987654  | 0.870236  |
| C  | 3.715969  | 2.709604  | -0.452504 |
| C  | -0.650834 | 1.199493  | -0.035497 |
| C  | -1.568703 | 2.336480  | -0.038484 |
| C  | -1.615600 | 3.225265  | 1.046944  |
| C  | -2.486548 | 4.312288  | 1.026550  |
| C  | -3.315711 | 4.529518  | -0.073730 |
| C  | -3.280131 | 3.645024  | -1.152659 |
| C  | -2.424178 | 2.547736  | -1.131649 |
| C  | 0.643332  | 1.101662  | -0.065985 |
| Au | -1.539409 | -0.749848 | 0.029550  |
| C  | 1.773954  | 0.331393  | -0.042802 |
| C  | 2.868622  | -0.221563 | -0.040982 |
| C  | 4.107222  | -0.920041 | -0.029733 |
| C  | 4.433409  | -1.805132 | -1.073886 |
| C  | 5.643673  | -2.488778 | -1.054126 |
| C  | 6.542000  | -2.292607 | -0.004156 |
| C  | 6.228499  | -1.411589 | 1.032825  |
| C  | 5.017820  | -0.729317 | 1.026426  |
| H  | 7.496388  | -2.830732 | 0.006048  |
| H  | 5.891369  | -3.179694 | -1.867358 |
| H  | 3.723749  | -1.949599 | -1.896038 |
| H  | 4.760265  | -0.037600 | 1.836740  |
| H  | 6.935060  | -1.258305 | 1.855828  |
| H  | -0.973545 | 3.046701  | 1.918100  |
| H  | -2.516638 | 4.997529  | 1.881313  |
| H  | -3.997384 | 5.387263  | -0.087707 |
| H  | -3.932192 | 3.807421  | -2.018364 |
| H  | -2.403514 | 1.843265  | -1.972487 |
| H  | 1.387779  | 3.547131  | 1.738954  |
| H  | 4.047352  | 2.972316  | 1.723853  |
| H  | 4.681740  | 2.435903  | -0.882061 |
| H  | 2.586031  | 2.669651  | -2.229104 |
| H  | 0.595310  | 3.480777  | -0.880620 |
| P  | -2.624828 | -2.842247 | 0.115658  |
| C  | -3.455016 | -3.173287 | 1.702865  |
| C  | -3.930704 | -3.044399 | -1.138822 |
| C  | -1.517741 | -4.267163 | -0.135584 |
| H  | -4.208703 | -2.390732 | 1.899604  |
| H  | -2.713980 | -3.161097 | 2.521264  |
| H  | -3.496662 | -2.942592 | -2.148987 |
| H  | -4.699351 | -2.262898 | -1.005651 |
| H  | -3.951789 | -4.161129 | 1.673388  |
| H  | -4.401167 | -4.040813 | -1.040782 |
| H  | -2.093904 | -5.210091 | -0.085292 |
| H  | -1.029359 | -4.189679 | -1.122882 |
| H  | -0.735927 | -4.274304 | 0.644158  |

TS\_3a1.4a\_  
 SCF Energy: -1420.94596720  
 ZPE-corrected Energy: -1420.54914  
 $\Delta U$ : -1420.52192  
 $\Delta H$ : -1420.52097  
 $\Delta G$ : -1420.61126

Num. Imaginary Frequencies: 1

Imaginary Frequency: -937.8825

|    |           |           |           |
|----|-----------|-----------|-----------|
| N  | -0.982161 | 4.233929  | -0.330749 |
| C  | -1.264780 | 2.920168  | -0.004144 |
| C  | -2.566306 | 2.898094  | 0.498666  |
| C  | -3.056260 | 4.217188  | 0.470087  |
| C  | -2.050350 | 5.016665  | -0.054853 |
| C  | -0.268225 | 1.879920  | -0.190023 |
| C  | 1.170213  | 2.303991  | -0.154580 |
| C  | 2.028432  | 2.116464  | -1.242748 |
| C  | 3.378522  | 2.446254  | -1.135956 |
| C  | 3.878455  | 2.965062  | 0.057579  |
| C  | 3.022180  | 3.167877  | 1.140256  |
| C  | 1.670880  | 2.847222  | 1.033861  |
| C  | -0.533941 | 0.470230  | -0.148010 |
| Au | 1.072836  | -0.909333 | -0.047098 |
| C  | -1.836017 | -0.046082 | -0.134858 |
| C  | -2.928232 | -0.600992 | -0.107289 |
| C  | -4.215903 | -1.198478 | -0.066316 |
| C  | -5.370826 | -0.394330 | -0.123938 |
| C  | -6.630295 | -0.979111 | -0.081431 |
| C  | -6.753119 | -2.366055 | 0.023856  |
| C  | -5.614620 | -3.172467 | 0.082757  |
| C  | -4.351252 | -2.596485 | 0.034707  |
| H  | -7.747932 | -2.824063 | 0.059444  |
| H  | -7.525933 | -0.350367 | -0.129386 |
| H  | -5.262283 | 0.693006  | -0.208876 |
| H  | -3.450572 | -3.218870 | 0.077568  |
| H  | -5.715863 | -4.260086 | 0.164633  |
| H  | 1.640577  | 1.707669  | -2.185218 |
| H  | 4.042411  | 2.300086  | -1.995207 |
| H  | 4.940278  | 3.221573  | 0.142361  |
| H  | 3.409501  | 3.579531  | 2.078810  |
| H  | 0.996565  | 3.001545  | 1.885585  |
| H  | -3.087625 | 2.015071  | 0.869789  |
| H  | -4.036982 | 4.559551  | 0.803491  |
| H  | -2.025233 | 6.090389  | -0.245241 |
| H  | -0.101754 | 4.557250  | -0.725673 |
| H  | -0.372861 | 1.240469  | -1.291000 |
| P  | 2.928022  | -2.360781 | 0.135470  |
| C  | 4.498574  | -1.436301 | 0.170190  |
| C  | 2.956825  | -3.383995 | 1.642670  |
| C  | 3.119580  | -3.547610 | -1.233752 |
| H  | 4.508489  | -0.758381 | 1.042576  |
| H  | 4.588642  | -0.825891 | -0.746279 |
| H  | 2.070236  | -4.041775 | 1.663899  |
| H  | 2.932238  | -2.732295 | 2.533696  |
| H  | 5.357494  | -2.130281 | 0.234833  |
| H  | 3.872690  | -4.003696 | 1.667370  |
| H  | 4.026597  | -4.161980 | -1.080585 |
| H  | 2.235810  | -4.207680 | -1.282678 |
| H  | 3.205014  | -3.002594 | -2.190320 |

TS\_3a\_3a1  
 SCF Energy: -1420.91658291  
 ZPE-corrected Energy: -1420.52108  
 $\Delta U$ : -1420.49354  
 $\Delta H$ : -1420.49259  
 $\Delta G$ : -1420.58453

Num. Imaginary Frequencies: 1

Imaginary Frequency: -1176.7902

|    |           |           |           |
|----|-----------|-----------|-----------|
| N  | 0.854396  | 4.255561  | 0.081281  |
| C  | 1.246850  | 2.924624  | -0.033722 |
| C  | 2.613671  | 2.937863  | -0.399037 |
| C  | 3.003557  | 4.273761  | -0.513106 |
| C  | 1.892555  | 5.060601  | -0.214014 |
| C  | 0.230731  | 1.802531  | 0.110362  |
| C  | -1.194399 | 2.242966  | 0.182341  |
| C  | -1.948024 | 2.058135  | 1.346885  |
| C  | -3.304802 | 2.377140  | 1.363819  |
| C  | -3.917920 | 2.878626  | 0.215658  |
| C  | -3.169851 | 3.074801  | -0.945745 |
| C  | -1.810991 | 2.766838  | -0.960559 |
| C  | 0.548360  | 0.446648  | 0.061850  |
| Au | -1.039585 | -0.934534 | -0.015741 |
| C  | 1.848371  | -0.048349 | 0.062010  |
| C  | 2.961506  | -0.569294 | 0.075253  |
| C  | 4.253220  | -1.158671 | 0.084007  |
| C  | 5.396419  | -0.375216 | 0.338466  |
| C  | 6.657794  | -0.957745 | 0.342507  |
| C  | 6.798403  | -2.323663 | 0.089178  |
| C  | 5.673168  | -3.110559 | -0.164926 |
| C  | 4.407795  | -2.536970 | -0.164875 |
| H  | 7.794773  | -2.779677 | 0.091014  |
| H  | 7.541720  | -0.342799 | 0.544005  |
| H  | 5.278459  | 0.695706  | 0.540255  |
| H  | 3.518281  | -3.146048 | -0.360770 |
| H  | 5.786018  | -4.182194 | -0.362543 |
| H  | -1.464149 | 1.647088  | 2.242244  |
| H  | -3.887737 | 2.230918  | 2.280078  |
| H  | -4.986053 | 3.123238  | 0.226845  |
| H  | -3.649168 | 3.468704  | -1.848879 |
| H  | -1.220168 | 2.914346  | -1.874155 |
| H  | 3.227657  | 2.051574  | -0.557698 |
| H  | 3.992692  | 4.644511  | -0.783768 |
| H  | 1.783384  | 6.145643  | -0.193839 |
| H  | -0.089614 | 4.563319  | 0.309475  |
| H  | 0.988984  | 2.274574  | 1.073129  |
| P  | -2.944979 | -2.339474 | -0.119447 |
| C  | -2.924985 | -3.626982 | -1.409908 |
| C  | -3.328876 | -3.240059 | 1.418968  |
| C  | -4.446622 | -1.361123 | -0.460524 |
| H  | -2.082025 | -4.317889 | -1.232850 |
| H  | -2.791642 | -3.158015 | -2.400619 |
| H  | -3.446787 | -2.521814 | 2.249456  |
| H  | -2.501137 | -3.927966 | 1.665790  |
| H  | -3.872610 | -4.197382 | -1.400098 |
| H  | -4.263721 | -3.819847 | 1.302080  |
| H  | -5.342394 | -2.009670 | -0.486374 |
| H  | -4.570330 | -0.594532 | 0.326272  |
| H  | -4.338856 | -0.845863 | -1.432088 |

TS.4a\_5a  
 SCF Energy: -1420.98284090  
 ZPE-corrected Energy: -1420.58255  
 $\Delta U$ : -1420.55599  
 $\Delta H$ : -1420.55504  
 $\Delta G$ : -1420.64348  
 Num. Imaginary Frequencies: 1  
 Imaginary Frequency: -486.3716

|    |           |           |           |
|----|-----------|-----------|-----------|
| C  | 2.720672  | 3.383319  | -0.246912 |
| C  | 3.670293  | 2.988351  | -1.149483 |
| N  | 3.841837  | 1.624624  | -1.036889 |
| C  | 3.014869  | 1.124652  | -0.085889 |
| C  | 2.263905  | 2.203198  | 0.428698  |
| C  | 2.836737  | -0.286103 | 0.185613  |
| C  | 4.008967  | -1.182012 | 0.177512  |
| C  | 5.244207  | -0.727742 | 0.669881  |
| C  | 6.351615  | -1.570387 | 0.702162  |
| C  | 6.248011  | -2.880866 | 0.236963  |
| C  | 5.030111  | -3.341779 | -0.264239 |
| C  | 3.921829  | -2.501100 | -0.296455 |
| H  | 2.389016  | 4.406888  | -0.065260 |
| H  | 4.250816  | 3.560362  | -1.873872 |
| H  | 4.434712  | 1.057543  | -1.640765 |
| H  | 1.831558  | 2.199297  | 1.436106  |
| H  | 5.331415  | 0.296093  | 1.054335  |
| H  | 7.303483  | -1.200820 | 1.099785  |
| H  | 7.120370  | -3.543611 | 0.258822  |
| H  | 4.945044  | -4.365537 | -0.645668 |
| H  | 2.979102  | -2.865096 | -0.721355 |
| C  | 1.560190  | -0.751916 | 0.341641  |
| C  | 0.390977  | 0.082679  | 0.199389  |
| C  | 0.299509  | 1.373573  | 0.063680  |
| Au | -1.553233 | -0.789735 | 0.014406  |
| H  | 1.414303  | -1.824166 | 0.518182  |
| C  | -0.544052 | 2.537220  | 0.159232  |
| C  | -1.376069 | 2.709503  | 1.281456  |
| C  | -2.216359 | 3.813849  | 1.364470  |
| C  | -2.231935 | 4.756485  | 0.334839  |
| C  | -1.405950 | 4.597162  | -0.780281 |
| C  | -0.561543 | 3.497018  | -0.867389 |
| H  | -1.354477 | 1.959729  | 2.081393  |
| H  | -2.863919 | 3.943112  | 2.238481  |
| H  | -2.894246 | 5.626833  | 0.402424  |
| H  | -1.422840 | 5.338414  | -1.586506 |
| H  | 0.096221  | 3.363020  | -1.734095 |
| P  | -3.665920 | -1.824868 | -0.181744 |
| C  | -4.398078 | -2.329726 | 1.408794  |
| C  | -4.929784 | -0.762693 | -0.954082 |
| C  | -3.662873 | -3.344606 | -1.187360 |
| H  | -5.386004 | -2.799055 | 1.243098  |
| H  | -3.731490 | -3.050883 | 1.913713  |
| H  | -4.518625 | -1.446875 | 2.060836  |
| H  | -4.683558 | -3.767476 | -1.241960 |
| H  | -3.306835 | -3.117672 | -2.207596 |
| H  | -2.983669 | -4.089126 | -0.735975 |
| H  | -5.894040 | -1.300923 | -1.018736 |
| H  | -5.062644 | 0.154706  | -0.353737 |
| H  | -4.603835 | -0.473509 | -1.968786 |

TS\_4a\_6a  
SCF Energy: -1420.98414097  
ZPE-corrected Energy: -1420.58444  
 $\Delta U$ : -1420.55786  
 $\Delta H$ : -1420.55691  
 $\Delta G$ : -1420.64530

Num. Imaginary Frequencies: 1

Imaginary Frequency: -472.6982

|    |           |           |           |
|----|-----------|-----------|-----------|
| C  | 2.248216  | 3.191148  | 0.896685  |
| C  | 2.223667  | 2.175845  | -0.113020 |
| C  | 3.145287  | 2.781833  | 1.849724  |
| N  | 3.678760  | 1.563545  | 1.482678  |
| C  | 3.118728  | 1.161564  | 0.315216  |
| C  | 0.819196  | 0.671381  | -0.509347 |
| C  | 1.774286  | -0.329854 | -0.785087 |
| C  | 3.039083  | -0.147071 | -0.262929 |
| C  | -0.417051 | 1.073731  | -0.405403 |
| C  | -0.924874 | 2.447588  | -0.420057 |
| C  | -0.589676 | 3.322004  | -1.467065 |
| C  | -1.024081 | 4.645067  | -1.449679 |
| C  | -1.790501 | 5.118185  | -0.384411 |
| C  | -2.138184 | 4.254238  | 0.654887  |
| C  | -1.723063 | 2.925446  | 0.630718  |
| Au | -1.756639 | -0.549577 | -0.080699 |
| P  | -3.309439 | -2.297060 | 0.268042  |
| C  | -5.047597 | -1.756449 | 0.183609  |
| C  | -3.160976 | -3.111501 | 1.892136  |
| C  | -3.192213 | -3.656140 | -0.941009 |
| H  | 4.247265  | 0.974028  | 2.088640  |
| H  | 1.720896  | 4.146848  | 0.874387  |
| H  | 2.025042  | 2.391390  | -1.171427 |
| H  | 3.473510  | 3.268219  | 2.769488  |
| H  | 1.507142  | -1.174682 | -1.434693 |
| C  | 4.126662  | -1.122990 | -0.260941 |
| H  | 0.003402  | 2.950487  | -2.312218 |
| H  | -0.760581 | 5.313519  | -2.277344 |
| H  | -2.126641 | 6.161073  | -0.368887 |
| H  | -2.745883 | 4.617733  | 1.491392  |
| H  | -2.001176 | 2.243359  | 1.443917  |
| H  | -5.235259 | -0.986799 | 0.952885  |
| H  | -5.252987 | -1.318508 | -0.809027 |
| H  | -5.724714 | -2.614702 | 0.351904  |
| H  | -3.914392 | -3.915924 | 1.986554  |
| H  | -2.150551 | -3.542714 | 2.003822  |
| H  | -3.316530 | -2.369573 | 2.695093  |
| H  | -3.948302 | -4.431996 | -0.717052 |
| H  | -3.362244 | -3.263565 | -1.959022 |
| H  | -2.184710 | -4.106535 | -0.901867 |
| C  | 3.861682  | -2.498387 | -0.369890 |
| C  | 5.461344  | -0.697581 | -0.154181 |
| C  | 6.501691  | -1.621780 | -0.156377 |
| C  | 6.224982  | -2.983944 | -0.268374 |
| C  | 4.902575  | -3.419441 | -0.375694 |
| H  | 2.824668  | -2.849293 | -0.429092 |
| H  | 5.688427  | 0.374115  | -0.093277 |
| H  | 7.537819  | -1.274723 | -0.078613 |
| H  | 7.043794  | -3.712006 | -0.270592 |
| H  | 4.681663  | -4.489434 | -0.456190 |



TS\_7a1\_8a\_  
SCF Energy: -1420.93340143  
ZPE-corrected Energy: -1420.53660  
 $\Delta U$ : -1420.50934  
 $\Delta H$ : -1420.50839  
 $\Delta G$ : -1420.59845

Num. Imaginary Frequencies: 1

Imaginary Frequency: -696.4171

|    |           |           |           |
|----|-----------|-----------|-----------|
| C  | 3.117403  | 4.614665  | -0.037825 |
| C  | 1.919089  | 3.896782  | 0.180227  |
| C  | 4.005110  | 3.746107  | -0.644596 |
| N  | 3.395434  | 2.536378  | -0.786337 |
| C  | 2.117687  | 2.603436  | -0.281398 |
| C  | 1.155638  | 1.483293  | -0.272226 |
| C  | 1.437884  | 0.079874  | -0.081427 |
| C  | 2.807546  | -0.387599 | 0.134414  |
| C  | 3.613598  | 0.216006  | 1.119102  |
| C  | 4.866160  | -0.308786 | 1.416493  |
| C  | 5.350197  | -1.410277 | 0.708820  |
| C  | 4.563920  | -2.012555 | -0.275122 |
| C  | 3.289549  | -1.524402 | -0.538941 |
| Au | -0.146661 | -1.308241 | -0.110647 |
| P  | -1.936007 | -2.867162 | -0.075135 |
| C  | -2.776228 | -2.983369 | 1.538652  |
| C  | -3.266504 | -2.478313 | -1.259139 |
| C  | -1.458225 | -4.582231 | -0.463825 |
| C  | -0.221802 | 1.894043  | -0.156608 |
| C  | -1.385755 | 2.227021  | -0.048770 |
| C  | -2.764485 | 2.561393  | 0.091113  |
| C  | -3.660677 | 1.605771  | 0.602153  |
| C  | -5.009318 | 1.915074  | 0.736170  |
| C  | -5.476229 | 3.177556  | 0.365907  |
| C  | -4.592382 | 4.132206  | -0.139454 |
| C  | -3.242140 | 3.829906  | -0.279051 |
| H  | 3.312013  | 5.658093  | 0.214244  |
| H  | 0.997680  | 4.265632  | 0.634831  |
| H  | 5.026482  | 3.900050  | -0.994637 |
| H  | 3.241424  | 1.087046  | 1.671728  |
| H  | 5.475613  | 0.151615  | 2.201596  |
| H  | 6.345722  | -1.809132 | 0.933165  |
| H  | 4.940411  | -2.881821 | -0.824889 |
| H  | 2.650801  | -2.014056 | -1.284585 |
| H  | -3.597018 | -3.723155 | 1.489433  |
| H  | -2.053117 | -3.292368 | 2.313798  |
| H  | -3.189972 | -1.998172 | 1.818103  |
| H  | -2.860642 | -2.469933 | -2.286032 |
| H  | -4.073754 | -3.231563 | -1.192060 |
| H  | -3.680883 | -1.478553 | -1.038786 |
| H  | -1.016119 | -4.627884 | -1.474542 |
| H  | -0.706724 | -4.933663 | 0.264988  |
| H  | -2.343839 | -5.243507 | -0.422665 |
| H  | -3.278140 | 0.619741  | 0.893752  |
| H  | -5.703880 | 1.167364  | 1.134582  |
| H  | -6.539460 | 3.419833  | 0.472977  |
| H  | -4.960852 | 5.122582  | -0.428484 |
| H  | -2.541710 | 4.572530  | -0.677009 |
| H  | 3.827988  | 1.719949  | -1.210221 |
| H  | 1.246028  | 0.849643  | -1.324802 |

TS\_7a\_7a1  
 SCF Energy: -1420.90379247  
 ZPE-corrected Energy: -1420.50817  
 $\Delta U$ : -1420.48070  
 $\Delta H$ : -1420.47975  
 $\Delta G$ : -1420.57134  
 Num. Imaginary Frequencies: 1  
 Imaginary Frequency: -1138.9310

|    |           |           |           |
|----|-----------|-----------|-----------|
| C  | 2.614246  | 4.812366  | 0.596266  |
| C  | 1.531144  | 4.084702  | 0.083122  |
| C  | 3.578631  | 3.891795  | 0.985224  |
| N  | 3.124517  | 2.641601  | 0.729130  |
| C  | 1.859075  | 2.723355  | 0.187458  |
| C  | 0.950948  | 1.521304  | -0.111817 |
| C  | 1.378086  | 0.190532  | -0.135158 |
| C  | 2.787927  | -0.148786 | -0.322356 |
| C  | 3.427704  | -1.000661 | 0.598201  |
| C  | 4.781947  | -1.293407 | 0.467298  |
| C  | 5.509081  | -0.791072 | -0.612743 |
| C  | 4.874590  | 0.012303  | -1.560876 |
| C  | 3.530892  | 0.340206  | -1.414520 |
| Au | -0.024561 | -1.347526 | 0.044729  |
| P  | -1.602922 | -3.118669 | 0.241249  |
| C  | -3.269373 | -2.700022 | -0.368834 |
| C  | -1.150037 | -4.629018 | -0.674565 |
| C  | -1.877674 | -3.689124 | 1.951475  |
| C  | -0.443680 | 1.857044  | -0.135209 |
| C  | -1.628161 | 2.131932  | -0.162794 |
| C  | -3.027335 | 2.407306  | -0.205717 |
| C  | -3.893127 | 1.523428  | -0.873925 |
| C  | -5.259465 | 1.779154  | -0.913364 |
| C  | -5.776979 | 2.917318  | -0.292873 |
| C  | -4.923857 | 3.801176  | 0.369495  |
| C  | -3.556460 | 3.550878  | 0.416560  |
| H  | 2.696861  | 5.896718  | 0.674022  |
| H  | 0.596594  | 4.471544  | -0.327208 |
| H  | 4.561813  | 4.045424  | 1.431607  |
| H  | 2.850489  | -1.412023 | 1.435452  |
| H  | 5.271331  | -1.934418 | 1.208862  |
| H  | 6.570059  | -1.039618 | -0.724691 |
| H  | 5.432160  | 0.388340  | -2.425731 |
| H  | 3.041808  | 0.959409  | -2.178799 |
| H  | -3.948699 | -3.565481 | -0.255221 |
| H  | -3.670524 | -1.844049 | 0.202438  |
| H  | -3.215770 | -2.416359 | -1.434944 |
| H  | -0.182295 | -5.012587 | -0.305867 |
| H  | -1.926070 | -5.405861 | -0.540987 |
| H  | -1.047961 | -4.396487 | -1.749252 |
| H  | -0.927369 | -4.051860 | 2.381097  |
| H  | -2.244137 | -2.850153 | 2.569013  |
| H  | -2.621745 | -4.507588 | 1.967954  |
| H  | -3.475851 | 0.635275  | -1.363439 |
| H  | -5.928276 | 1.085759  | -1.435359 |
| H  | -6.853834 | 3.117332  | -0.326271 |
| H  | -5.329736 | 4.694888  | 0.856358  |
| H  | -2.881402 | 4.238634  | 0.938246  |
| H  | 3.619544  | 1.777508  | 0.943951  |
| H  | 1.616798  | 2.112792  | -1.019586 |

TS.8a\_10a  
 SCF Energy: -1420.95280157  
 ZPE-corrected Energy: -1420.55307  
 $\Delta U$ : -1420.52648  
 $\Delta H$ : -1420.52554  
 $\Delta G$ : -1420.61299  
 Num. Imaginary Frequencies: 1  
 Imaginary Frequency: -326.7739

|    |           |           |           |
|----|-----------|-----------|-----------|
| C  | 2.012529  | 2.099186  | -0.040466 |
| C  | 1.914938  | 3.233492  | 0.784815  |
| C  | 2.964906  | 4.144804  | 0.867150  |
| C  | 4.126579  | 3.946934  | 0.121091  |
| C  | 4.240445  | 2.819838  | -0.694772 |
| C  | 3.202299  | 1.896109  | -0.761758 |
| H  | 1.011457  | 3.380416  | 1.387981  |
| H  | 2.875785  | 5.017171  | 1.524909  |
| H  | 4.950812  | 4.666437  | 0.183972  |
| H  | 5.153274  | 2.654141  | -1.278288 |
| H  | 3.298015  | 1.003523  | -1.393140 |
| C  | 0.914410  | 1.138876  | -0.133310 |
| C  | -1.005068 | 4.373365  | -0.163031 |
| C  | -1.003215 | 3.110323  | -0.863207 |
| C  | -2.021362 | 4.330105  | 0.746836  |
| N  | -2.649656 | 3.093761  | 0.672011  |
| C  | -2.087094 | 2.361718  | -0.300012 |
| C  | -1.724438 | 0.945036  | -0.336434 |
| C  | -2.350475 | -0.244456 | -0.217790 |
| C  | -3.781740 | -0.490594 | -0.150993 |
| C  | -4.744454 | 0.483944  | -0.475227 |
| C  | -6.101184 | 0.199629  | -0.377355 |
| C  | -6.528261 | -1.063672 | 0.039340  |
| C  | -5.586864 | -2.045288 | 0.348052  |
| C  | -4.228346 | -1.762836 | 0.248535  |
| C  | -0.368023 | 1.404415  | -0.320512 |
| H  | -0.377863 | 5.237552  | -0.385889 |
| H  | -0.649893 | 2.996472  | -1.894275 |
| H  | -2.381326 | 5.083602  | 1.448418  |
| H  | -4.430456 | 1.470608  | -0.837974 |
| H  | -6.836728 | 0.968373  | -0.639286 |
| H  | -7.598901 | -1.284565 | 0.113225  |
| H  | -5.914671 | -3.041106 | 0.666612  |
| H  | -3.487837 | -2.535718 | 0.490054  |
| H  | -3.302118 | 2.728903  | 1.366675  |
| H  | -1.696915 | -1.127145 | -0.139786 |
| Au | 1.273714  | -0.947602 | -0.023188 |
| P  | 1.613863  | -3.287528 | 0.124621  |
| C  | 2.963020  | -3.945731 | -0.909634 |
| C  | 1.991052  | -3.885671 | 1.805073  |
| C  | 0.143682  | -4.242485 | -0.380463 |
| H  | 3.033362  | -5.043676 | -0.794077 |
| H  | 2.773168  | -3.701806 | -1.969688 |
| H  | 3.920838  | -3.485563 | -0.609545 |
| H  | 1.172936  | -3.604099 | 2.491317  |
| H  | 2.106627  | -4.985785 | 1.805833  |
| H  | 2.925679  | -3.420206 | 2.164658  |
| H  | -0.109697 | -4.006160 | -1.429347 |
| H  | 0.336168  | -5.327829 | -0.287544 |
| H  | -0.715513 | -3.968637 | 0.258099  |

TS\_8a\_9a  
SCF Energy: -1420.96744892  
ZPE-corrected Energy: -1420.56767  
 $\Delta U$ : -1420.54092  
 $\Delta H$ : -1420.53997  
 $\Delta G$ : -1420.62891

Num. Imaginary Frequencies: 1

Imaginary Frequency: -451.1525

|    |           |           |           |
|----|-----------|-----------|-----------|
| C  | 0.920247  | 2.856549  | 0.020622  |
| C  | 1.068247  | 3.934514  | -0.874195 |
| C  | 2.011397  | 4.921398  | -0.626258 |
| C  | 2.823200  | 4.848641  | 0.509440  |
| C  | 2.683994  | 3.788521  | 1.405712  |
| C  | 1.730150  | 2.804761  | 1.175372  |
| H  | 0.433841  | 3.993182  | -1.765463 |
| H  | 2.120040  | 5.757265  | -1.325513 |
| H  | 3.566550  | 5.630776  | 0.699081  |
| H  | 3.316109  | 3.735432  | 2.298651  |
| H  | 1.601939  | 1.973186  | 1.877839  |
| Au | 1.335115  | -0.842430 | -0.103143 |
| P  | 3.129059  | -2.390822 | -0.061049 |
| C  | 4.718697  | -1.679468 | 0.478485  |
| C  | 2.864135  | -3.810506 | 1.051717  |
| C  | 3.491694  | -3.139777 | -1.683088 |
| H  | 5.507302  | -2.455201 | 0.468814  |
| H  | 5.008010  | -0.856425 | -0.198554 |
| H  | 4.618173  | -1.274071 | 1.500741  |
| H  | 1.962308  | -4.366302 | 0.739836  |
| H  | 3.738198  | -4.487853 | 1.023522  |
| H  | 2.715121  | -3.451051 | 2.085194  |
| H  | 2.601740  | -3.679426 | -2.052091 |
| H  | 3.746363  | -2.347482 | -2.408866 |
| H  | 4.339399  | -3.845544 | -1.600103 |
| C  | -2.611871 | 3.749192  | -0.422957 |
| C  | -1.893130 | 2.599747  | -0.894473 |
| C  | -3.505868 | 3.308958  | 0.513463  |
| N  | -3.374835 | 1.934433  | 0.633309  |
| C  | -2.412325 | 1.488559  | -0.195374 |
| C  | -1.716038 | 0.192680  | -0.145379 |
| C  | -2.237343 | -1.047400 | 0.022871  |
| C  | -3.638494 | -1.454235 | 0.043287  |
| C  | -4.652542 | -0.747776 | -0.629032 |
| C  | -5.972805 | -1.182172 | -0.579147 |
| C  | -6.309526 | -2.332368 | 0.137311  |
| C  | -5.312052 | -3.056823 | 0.790276  |
| C  | -3.990104 | -2.627142 | 0.734886  |
| C  | -0.289530 | 0.504504  | -0.158177 |
| C  | 0.009558  | 1.780900  | -0.198164 |
| H  | -2.505802 | 4.775290  | -0.778753 |
| H  | -1.403051 | 2.530574  | -1.871166 |
| H  | -4.232251 | 3.847410  | 1.122834  |
| H  | -4.399302 | 0.137048  | -1.225570 |
| H  | -6.747937 | -0.623745 | -1.116083 |
| H  | -7.350717 | -2.672004 | 0.174010  |
| H  | -5.566266 | -3.968231 | 1.343060  |
| H  | -3.205211 | -3.201794 | 1.242510  |
| H  | -3.823496 | 1.367958  | 1.351772  |
| H  | -1.505307 | -1.853278 | 0.181965  |

# Cartesian coordinates of the indole mechanism

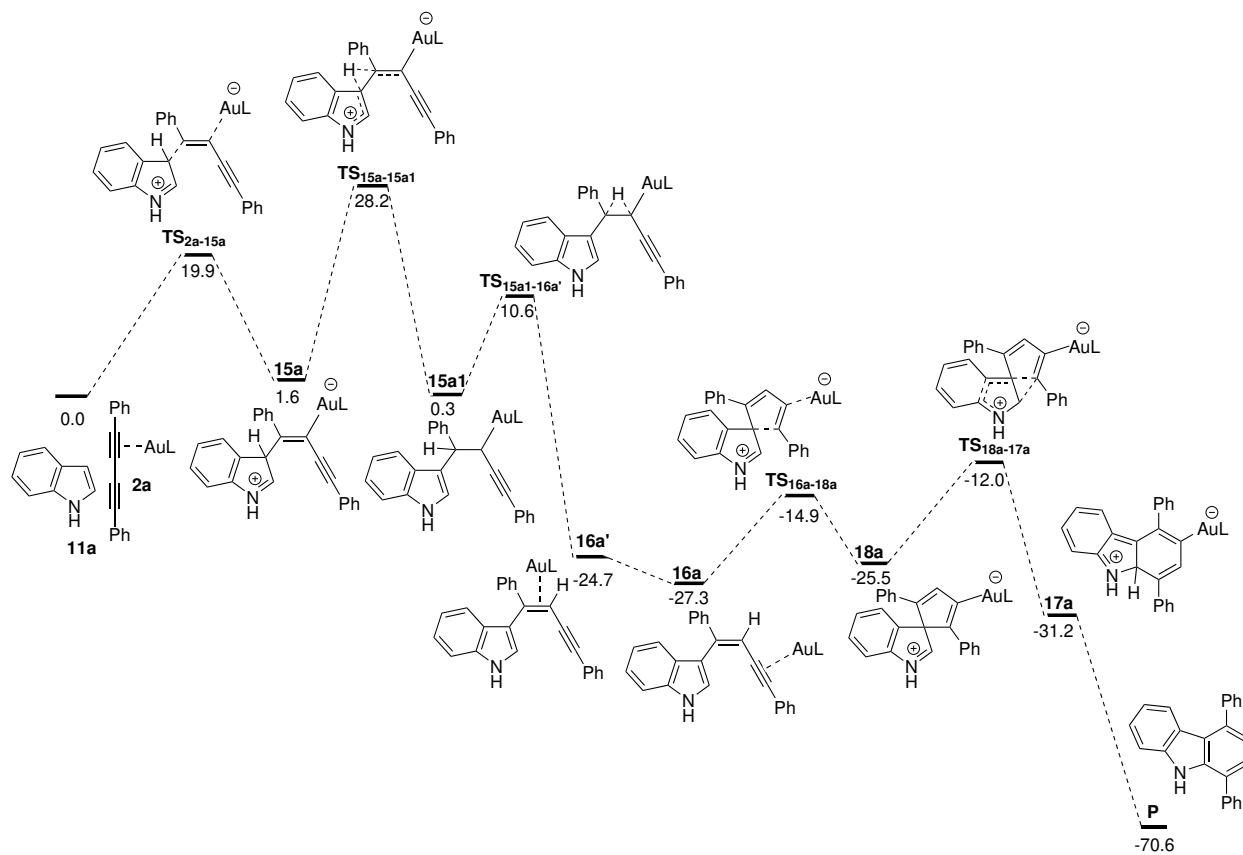

Figure S5: Indole reaction mechanism, part 1.

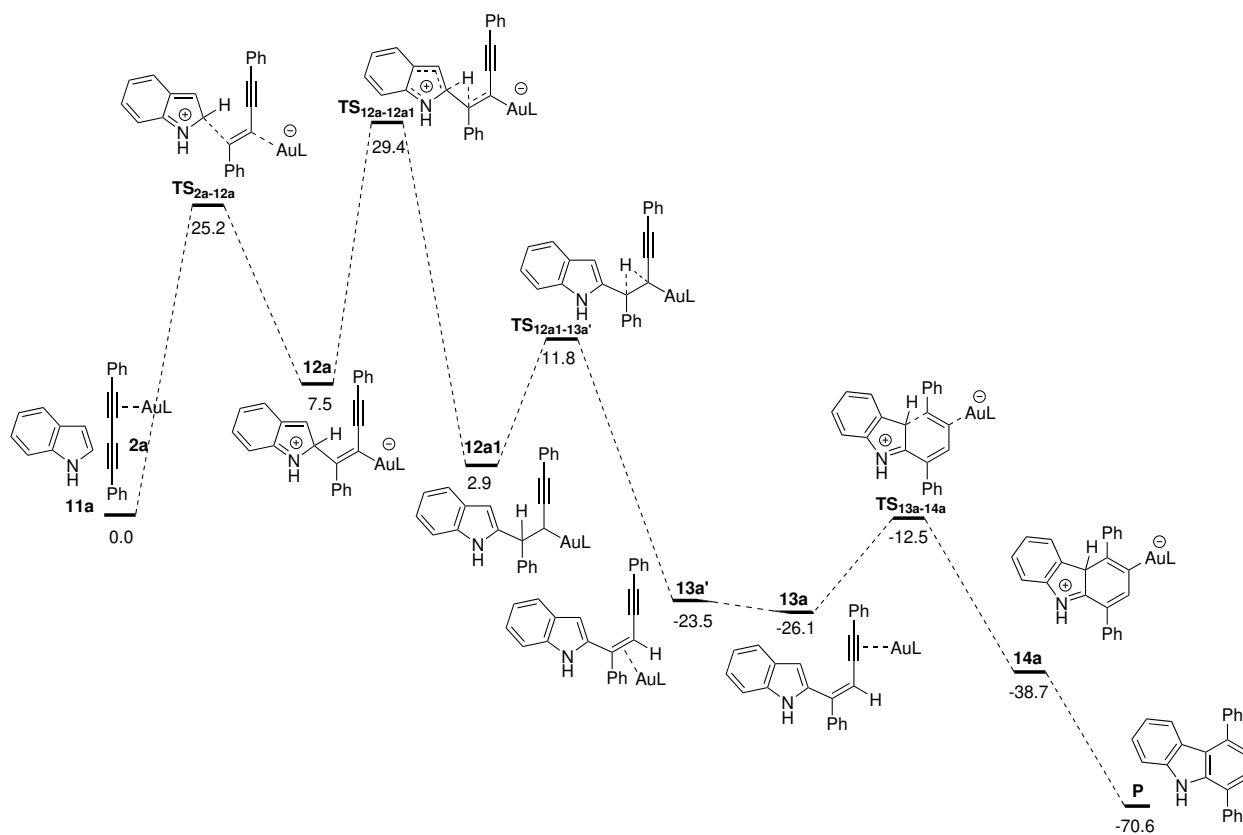

Figure S6: Indole reaction mechanism, part 2.

11a  
SCF Energy: -363.266770063  
ZPE-corrected Energy: -363.137589  
 $\Delta U$ : -363.131363  
 $\Delta H$ : -363.130419  
 $\Delta G$ : -363.167843  
Num. Imaginary Frequencies: 0

|   |           |           |           |
|---|-----------|-----------|-----------|
| N | 1.565369  | -1.076954 | -0.000089 |
| C | 0.252735  | -0.668905 | -0.000011 |
| C | 0.249066  | 0.752535  | 0.000013  |
| C | 1.622033  | 1.169353  | -0.000018 |
| C | 2.383102  | 0.028386  | -0.000017 |
| C | -0.984714 | 1.427031  | 0.000032  |
| H | 1.998505  | 2.193859  | -0.000038 |
| H | 3.468155  | -0.091144 | -0.000033 |
| H | 1.882103  | -2.041034 | 0.000171  |
| C | -0.929497 | -1.417146 | -0.000001 |
| C | -2.131276 | -0.722028 | 0.000030  |
| C | -2.158918 | 0.687628  | 0.000041  |
| H | -1.015027 | 2.523638  | 0.000036  |
| H | -3.126362 | 1.203965  | 0.000053  |
| H | -3.076115 | -1.278588 | 0.000039  |
| H | -0.904031 | -2.513140 | -0.000019 |

12a1  
SCF Energy: -1574.37834170  
ZPE-corrected Energy: -1573.93164  
 $\Delta U$ : -1573.90148  
 $\Delta H$ : -1573.90054  
 $\Delta G$ : -1573.99734

Num. Imaginary Frequencies: 0

|    |           |           |           |
|----|-----------|-----------|-----------|
| N  | 2.156584  | -1.552121 | 0.740747  |
| C  | 1.645456  | -1.670643 | -0.538970 |
| C  | 2.656524  | -2.027838 | -1.396336 |
| C  | 3.861601  | -2.109215 | -0.624915 |
| C  | 3.510624  | -1.791977 | 0.713811  |
| C  | 0.236173  | -1.281263 | -0.871518 |
| C  | -0.870082 | -2.233354 | -0.450864 |
| C  | -1.986882 | -2.383428 | -1.281342 |
| C  | -3.074080 | -3.156550 | -0.880281 |
| C  | -3.055710 | -3.795342 | 0.360566  |
| C  | -1.939175 | -3.666992 | 1.184598  |
| C  | -0.850219 | -2.893248 | 0.779584  |
| C  | -0.071946 | 0.155175  | -0.501780 |
| Au | -2.033736 | 0.733194  | -0.121093 |
| C  | 0.979125  | 1.003296  | -0.421724 |
| C  | 1.981707  | 1.728284  | -0.303883 |
| C  | 3.201534  | 2.402227  | -0.184297 |
| C  | 4.404802  | 1.667825  | -0.337651 |
| C  | 5.624651  | 2.310045  | -0.205548 |
| C  | 5.659760  | 3.680689  | 0.071670  |
| C  | 4.479903  | 4.418546  | 0.221100  |
| C  | 3.253107  | 3.788077  | 0.097465  |
| H  | 6.626780  | 4.185796  | 0.173333  |
| H  | 6.556688  | 1.746902  | -0.319444 |
| H  | 4.349665  | 0.593409  | -0.556433 |
| H  | 2.317076  | 4.344500  | 0.212990  |
| H  | 4.528347  | 5.490640  | 0.436644  |
| H  | -2.007206 | -1.877311 | -2.256234 |
| H  | -3.938962 | -3.266648 | -1.544724 |
| H  | -3.908813 | -4.404699 | 0.679605  |
| H  | -1.910059 | -4.175603 | 2.154856  |
| H  | 0.023380  | -2.812424 | 1.436552  |
| H  | 2.546408  | -2.186426 | -2.471298 |
| C  | 5.208879  | -2.370800 | -0.930791 |
| C  | 4.459014  | -1.729702 | 1.739502  |
| H  | 1.649302  | -1.201512 | 1.548348  |
| H  | 0.202223  | -1.226006 | -1.985730 |
| P  | -4.327042 | 1.170057  | 0.330712  |
| C  | -4.793704 | 2.893908  | 0.687129  |
| C  | -5.401132 | 0.669377  | -1.054242 |
| C  | -4.940700 | 0.210819  | 1.754282  |
| H  | -4.530513 | 3.536647  | -0.171033 |
| H  | -4.246969 | 3.252871  | 1.576647  |
| H  | -5.239145 | -0.401328 | -1.275027 |
| H  | -5.148241 | 1.256220  | -1.954903 |
| H  | -5.881652 | 2.961950  | 0.874227  |
| H  | -6.464134 | 0.834482  | -0.797062 |
| H  | -6.023994 | 0.382757  | 1.897836  |
| H  | -4.760407 | -0.865000 | 1.577169  |
| H  | -4.399186 | 0.511456  | 2.668494  |
| C  | 6.154524  | -2.298453 | 0.081860  |
| C  | 5.782732  | -1.980310 | 1.404161  |
| H  | 4.166787  | -1.480825 | 2.765870  |
| H  | 6.553212  | -1.931306 | 2.182360  |
| H  | 7.208987  | -2.493636 | -0.145413 |
| H  | 5.506175  | -2.618176 | -1.956699 |



12a

SCF Energy: -1574.37124764

ZPE-corrected Energy: -1573.92432

$\Delta U$ : -1573.89424

$\Delta H$ : -1573.89330

$\Delta G$ : -1573.99000

Num. Imaginary Frequencies: 0

|    |           |           |           |
|----|-----------|-----------|-----------|
| N  | -2.082152 | 2.591646  | 0.519785  |
| C  | -1.456622 | 2.092099  | -0.695322 |
| C  | -2.524173 | 1.256029  | -1.291463 |
| C  | -3.676263 | 1.382189  | -0.549197 |
| C  | -3.355979 | 2.198383  | 0.598086  |
| C  | -0.062746 | 1.511504  | -0.450461 |
| C  | 1.021923  | 2.514311  | -0.338731 |
| C  | 1.207598  | 3.511292  | -1.309412 |
| C  | 2.253061  | 4.426311  | -1.205872 |
| C  | 3.124738  | 4.375988  | -0.118302 |
| C  | 2.940144  | 3.406380  | 0.867142  |
| C  | 1.898193  | 2.488364  | 0.759119  |
| C  | 0.115124  | 0.180205  | -0.245920 |
| Au | 1.993716  | -0.733373 | 0.010592  |
| C  | -1.002575 | -0.674888 | -0.237028 |
| C  | -1.987811 | -1.404995 | -0.206757 |
| C  | -3.229180 | -2.096012 | -0.155773 |
| C  | -4.063508 | -1.948461 | 0.968763  |
| C  | -5.309250 | -2.565820 | 1.003711  |
| C  | -5.744811 | -3.327681 | -0.081073 |
| C  | -4.925173 | -3.478543 | -1.202039 |
| C  | -3.674570 | -2.872459 | -1.242056 |
| H  | -6.728516 | -3.809699 | -0.053104 |
| H  | -5.950943 | -2.446123 | 1.884082  |
| H  | -3.720304 | -1.335384 | 1.811392  |
| H  | -3.026850 | -2.987752 | -2.118534 |
| H  | -5.265715 | -4.078128 | -2.053690 |
| H  | 0.547013  | 3.555359  | -2.185547 |
| H  | 2.390451  | 5.182911  | -1.986781 |
| H  | 3.943812  | 5.099305  | -0.034927 |
| H  | 3.607186  | 3.371353  | 1.736308  |
| H  | 1.741187  | 1.742535  | 1.548065  |
| H  | -2.411695 | 0.739409  | -2.248370 |
| C  | -4.988492 | 0.845769  | -0.705724 |
| C  | -4.332847 | 2.473442  | 1.577356  |
| H  | -1.600505 | 3.188713  | 1.188963  |
| H  | -1.351664 | 2.954341  | -1.397207 |
| P  | 4.132062  | -1.741213 | 0.239715  |
| C  | 4.282308  | -3.420370 | -0.457368 |
| C  | 5.460752  | -0.791985 | -0.575387 |
| C  | 4.707139  | -1.918185 | 1.962706  |
| H  | 4.042692  | -3.398049 | -1.535226 |
| H  | 3.567976  | -4.096122 | 0.045381  |
| H  | 5.493666  | 0.230173  | -0.157059 |
| H  | 5.253538  | -0.718113 | -1.657662 |
| H  | 5.309462  | -3.807046 | -0.319302 |
| H  | 6.441090  | -1.281841 | -0.423448 |
| H  | 5.715685  | -2.371989 | 1.989248  |
| H  | 4.741987  | -0.925465 | 2.445593  |
| H  | 4.004849  | -2.557046 | 2.526739  |
| C  | -5.925710 | 1.137787  | 0.247487  |
| C  | -5.587963 | 1.942890  | 1.377680  |
| H  | -4.099089 | 3.089437  | 2.450290  |
| H  | -6.368051 | 2.147493  | 2.119877  |
| H  | -6.944100 | 0.746079  | 0.161376  |
| H  | -5.222441 | 0.217526  | -1.572380 |

13a\_

SCF Energy: -1574.42138044

ZPE-corrected Energy: -1573.97356

$\Delta U$ : -1573.94340

$\Delta H$ : -1573.94245

$\Delta G$ : -1574.03940

Num. Imaginary Frequencies: 0

|    |           |           |           |
|----|-----------|-----------|-----------|
| N  | -1.274309 | -2.347807 | 0.508101  |
| C  | -0.416256 | -1.796069 | -0.433824 |
| C  | 0.809936  | -2.432043 | -0.340605 |
| C  | 0.704491  | -3.408249 | 0.690071  |
| C  | -0.615282 | -3.318750 | 1.210876  |
| C  | -0.860660 | -0.732948 | -1.322041 |
| C  | -2.255020 | -0.778110 | -1.830193 |
| C  | -2.842865 | -2.025381 | -2.101022 |
| C  | -4.115907 | -2.106309 | -2.659448 |
| C  | -4.829435 | -0.945854 | -2.951701 |
| C  | -4.258494 | 0.299682  | -2.687629 |
| C  | -2.985068 | 0.382830  | -2.135990 |
| C  | 0.015821  | 0.244206  | -1.814279 |
| Au | -0.669118 | 1.331314  | 0.143901  |
| C  | 1.417172  | 0.304104  | -1.595076 |
| C  | 2.625217  | 0.395200  | -1.447242 |
| C  | 4.033585  | 0.451549  | -1.250627 |
| C  | 4.645366  | -0.380636 | -0.294268 |
| C  | 6.021602  | -0.331185 | -0.103783 |
| C  | 6.803606  | 0.543890  | -0.859785 |
| C  | 6.204924  | 1.372829  | -1.810050 |
| C  | 4.829389  | 1.331000  | -2.007298 |
| H  | 7.888019  | 0.580292  | -0.706824 |
| H  | 6.490737  | -0.981617 | 0.642755  |
| H  | 4.024783  | -1.063588 | 0.298142  |
| H  | 4.353032  | 1.978336  | -2.752087 |
| H  | 6.818352  | 2.059529  | -2.403852 |
| H  | -2.284442 | -2.946281 | -1.898496 |
| H  | -4.550479 | -3.089149 | -2.872142 |
| H  | -5.833866 | -1.010401 | -3.384306 |
| H  | -4.813625 | 1.218125  | -2.907213 |
| H  | -2.562317 | 1.373188  | -1.921304 |
| H  | 1.676697  | -2.240551 | -0.973903 |
| C  | 1.597391  | -4.352131 | 1.234616  |
| C  | -1.055035 | -4.135232 | 2.260977  |
| H  | -2.230103 | -2.044029 | 0.673863  |
| H  | -0.361094 | 0.874587  | -2.633954 |
| P  | -1.055280 | 2.718247  | 1.981632  |
| C  | 0.347462  | 3.817090  | 2.342711  |
| C  | -2.490963 | 3.810582  | 1.757123  |
| C  | -1.370743 | 1.802380  | 3.520062  |
| H  | 0.557033  | 4.455815  | 1.467006  |
| H  | 1.245485  | 3.214218  | 2.563877  |
| H  | -3.402467 | 3.204655  | 1.611931  |
| H  | -2.342082 | 4.445826  | 0.866575  |
| H  | 0.110065  | 4.455327  | 3.214235  |
| H  | -2.615709 | 4.453313  | 2.648527  |
| H  | -1.549900 | 2.512145  | 4.349221  |
| H  | -2.256671 | 1.155948  | 3.394634  |
| H  | -0.499947 | 1.168308  | 3.761908  |
| C  | 1.162741  | -5.160235 | 2.269817  |
| C  | -0.152006 | -5.050476 | 2.777258  |
| H  | -2.074636 | -4.053116 | 2.652379  |
| H  | -0.464522 | -5.707183 | 3.597326  |
| H  | 1.843776  | -5.898948 | 2.707232  |
| H  | 2.617719  | -4.438021 | 0.843212  |

13a

SCF Energy: -1574.42491365

ZPE-corrected Energy: -1573.97758

$\Delta U$ : -1573.94736

$\Delta H$ : -1573.94641

$\Delta G$ : -1574.04355

Num. Imaginary Frequencies: 0

|    |           |           |           |
|----|-----------|-----------|-----------|
| C  | 3.906577  | 1.677575  | 0.057139  |
| C  | 4.503288  | 0.737557  | 0.940881  |
| N  | 3.860057  | -0.459591 | 0.769341  |
| C  | 2.853410  | -0.315126 | -0.170975 |
| C  | 2.867330  | 0.989345  | -0.634479 |
| C  | 1.990211  | -1.423570 | -0.547224 |
| C  | 2.557103  | -2.787450 | -0.568952 |
| C  | 1.792116  | -3.894279 | -0.167457 |
| C  | 2.322180  | -5.180018 | -0.218168 |
| C  | 3.625204  | -5.382975 | -0.673109 |
| C  | 4.397273  | -4.292043 | -1.072607 |
| C  | 3.870983  | -3.004867 | -1.016628 |
| C  | 4.393075  | 2.998661  | 0.027104  |
| C  | 5.558400  | 1.087701  | 1.792606  |
| H  | 4.043817  | -1.309749 | 1.294754  |
| H  | 2.237807  | 1.387480  | -1.433078 |
| H  | 0.776088  | -3.739789 | 0.215415  |
| H  | 1.715034  | -6.031433 | 0.109106  |
| H  | 4.042445  | -6.395457 | -0.711936 |
| H  | 5.419379  | -4.445207 | -1.436429 |
| H  | 4.478828  | -2.154168 | -1.347386 |
| C  | 0.678938  | -1.229517 | -0.889501 |
| C  | 0.004225  | 0.007367  | -0.788843 |
| C  | -0.502771 | 1.140240  | -0.713357 |
| C  | -0.719901 | 2.558587  | -0.730508 |
| C  | -1.841305 | 3.127627  | -1.358283 |
| C  | -1.993361 | 4.509001  | -1.387446 |
| C  | -1.037309 | 5.334111  | -0.792204 |
| C  | 0.074775  | 4.774281  | -0.161994 |
| C  | 0.235792  | 3.393420  | -0.122990 |
| H  | -2.585587 | 2.476020  | -1.831460 |
| H  | -2.866336 | 4.948209  | -1.882377 |
| H  | -1.162156 | 6.422272  | -0.817439 |
| H  | 0.824116  | 5.419820  | 0.309427  |
| H  | 1.101029  | 2.944301  | 0.379356  |
| Au | -2.243510 | -0.186675 | -0.013280 |
| H  | 0.101404  | -2.079911 | -1.275250 |
| P  | -4.256248 | -1.091864 | 0.755645  |
| C  | -5.717772 | -0.480076 | -0.136494 |
| C  | -4.317454 | -2.902701 | 0.599726  |
| C  | -4.574361 | -0.744617 | 2.511911  |
| H  | -5.626070 | -0.717667 | -1.210658 |
| H  | -5.795044 | 0.615098  | -0.020952 |
| H  | -3.496832 | -3.356341 | 1.182552  |
| H  | -4.202176 | -3.190750 | -0.459772 |
| H  | -5.286652 | -3.277342 | 0.978414  |
| H  | -6.630935 | -0.956421 | 0.267181  |
| H  | -5.528641 | -1.209766 | 2.822202  |
| H  | -3.752341 | -1.151178 | 3.126595  |
| H  | -4.629691 | 0.346210  | 2.672352  |
| C  | 5.437629  | 3.344632  | 0.867348  |
| C  | 6.013492  | 2.396381  | 1.741516  |
| H  | 6.006167  | 0.353411  | 2.471195  |
| H  | 6.839389  | 2.702455  | 2.394033  |
| H  | 5.826896  | 4.369137  | 0.858954  |
| H  | 3.944021  | 3.737665  | -0.647782 |

14a

SCF Energy: -1574.44968370

ZPE-corrected Energy: -1573.99996

$\Delta U$ : -1573.97114

$\Delta H$ : -1573.97020

$\Delta G$ : -1574.06358

Num. Imaginary Frequencies: 0

|    |           |           |           |
|----|-----------|-----------|-----------|
| C  | 2.868279  | 2.275842  | -0.138818 |
| C  | 4.141286  | 1.763971  | 0.156945  |
| N  | 4.091229  | 0.362807  | 0.102205  |
| C  | 2.865357  | -0.069608 | -0.189657 |
| C  | 1.996300  | 1.097850  | -0.477831 |
| C  | 2.364312  | -1.384848 | -0.205259 |
| C  | 3.252410  | -2.558854 | -0.079994 |
| C  | 2.952840  | -3.588782 | 0.823016  |
| C  | 3.784458  | -4.700552 | 0.929977  |
| C  | 4.929538  | -4.799012 | 0.139630  |
| C  | 5.237409  | -3.781466 | -0.762788 |
| C  | 4.404790  | -2.670275 | -0.873140 |
| C  | 2.684421  | 3.653263  | -0.190461 |
| H  | 4.883966  | -0.250368 | 0.295447  |
| H  | 1.995093  | 1.082968  | -1.605883 |
| H  | 2.066047  | -3.505339 | 1.463277  |
| H  | 3.540084  | -5.494405 | 1.644665  |
| H  | 5.584865  | -5.672754 | 0.227406  |
| H  | 6.129025  | -3.857145 | -1.395162 |
| H  | 4.637342  | -1.890394 | -1.610098 |
| C  | 0.978848  | -1.482883 | -0.234323 |
| C  | 0.039967  | -0.395071 | -0.198462 |
| C  | 0.529331  | 0.889510  | -0.236710 |
| C  | -0.353226 | 2.072075  | -0.168639 |
| C  | -1.344195 | 2.300486  | -1.134574 |
| C  | -2.216140 | 3.380180  | -1.009873 |
| C  | -2.116661 | 4.236662  | 0.087374  |
| C  | -1.135607 | 4.016294  | 1.054447  |
| C  | -0.253019 | 2.946590  | 0.922429  |
| H  | -1.420529 | 1.624129  | -1.995030 |
| H  | -2.980004 | 3.554287  | -1.776458 |
| H  | -2.806878 | 5.081870  | 0.188422  |
| H  | -1.058891 | 4.681280  | 1.922034  |
| H  | 0.510747  | 2.769437  | 1.690394  |
| Au | -2.021731 | -0.739830 | -0.021747 |
| H  | 0.571622  | -2.504341 | -0.232855 |
| P  | -4.384884 | -0.967572 | 0.129458  |
| C  | -5.228056 | -0.393161 | -1.384944 |
| C  | -5.058494 | -2.639128 | 0.414246  |
| C  | -5.128360 | 0.049570  | 1.450754  |
| H  | -4.916720 | -1.014528 | -2.243496 |
| H  | -4.937029 | 0.653826  | -1.588098 |
| H  | -4.669195 | -3.040194 | 1.366717  |
| H  | -4.742675 | -3.310985 | -0.403284 |
| H  | -6.163556 | -2.609208 | 0.455317  |
| H  | -6.326777 | -0.452672 | -1.270261 |
| H  | -6.231425 | -0.033663 | 1.433371  |
| H  | -4.752550 | -0.282265 | 2.434805  |
| H  | -4.839707 | 1.106414  | 1.305918  |
| C  | 3.769253  | 4.483192  | 0.100671  |
| C  | 5.025189  | 3.950970  | 0.410713  |
| C  | 5.235666  | 2.573649  | 0.433701  |
| H  | 1.712147  | 4.084984  | -0.449726 |
| H  | 3.633754  | 5.569791  | 0.082459  |
| H  | 5.859506  | 4.625180  | 0.632137  |
| H  | 6.217791  | 2.145829  | 0.658096  |

15a1

SCF Energy: -1574.38309066

ZPE-corrected Energy: -1573.93579

$\Delta U$ : -1573.90580

$\Delta H$ : -1573.90485

$\Delta G$ : -1574.00143

Num. Imaginary Frequencies: 0

|    |           |           |           |
|----|-----------|-----------|-----------|
| N  | 3.364966  | 2.995006  | -0.932379 |
| C  | 2.011267  | 2.780365  | -0.974806 |
| C  | 1.628279  | 1.978908  | 0.074951  |
| C  | 2.825589  | 1.690590  | 0.821826  |
| C  | 3.895304  | 2.341894  | 0.154876  |
| C  | 0.252839  | 1.458490  | 0.377990  |
| C  | -0.865624 | 2.240585  | -0.278841 |
| C  | -1.652490 | 3.129360  | 0.457315  |
| C  | -2.708561 | 3.808154  | -0.150183 |
| C  | -2.985626 | 3.606527  | -1.502161 |
| C  | -2.198044 | 2.728157  | -2.247359 |
| C  | -1.144270 | 2.049287  | -1.638263 |
| C  | 0.040942  | -0.019747 | 0.153088  |
| Au | -1.903424 | -0.758720 | 0.263811  |
| C  | 1.102607  | -0.797985 | -0.153307 |
| C  | 2.089828  | -1.511634 | -0.398103 |
| C  | 3.302543  | -2.165902 | -0.643007 |
| C  | 3.365515  | -3.570114 | -0.801203 |
| C  | 4.588997  | -4.182658 | -1.017655 |
| C  | 5.753756  | -3.409086 | -1.077243 |
| C  | 5.706224  | -2.019581 | -0.924927 |
| C  | 4.488809  | -1.394695 | -0.710864 |
| H  | 6.718378  | -3.900783 | -1.245884 |
| H  | 4.646653  | -5.269017 | -1.139500 |
| H  | 2.441702  | -4.155594 | -0.746356 |
| H  | 4.420261  | -0.306730 | -0.585499 |
| H  | 6.626629  | -1.428543 | -0.973607 |
| H  | -1.440247 | 3.285893  | 1.522663  |
| H  | -3.321041 | 4.500095  | 0.439074  |
| H  | -3.816702 | 4.138836  | -1.978594 |
| H  | -2.407666 | 2.567696  | -3.311066 |
| H  | -0.530060 | 1.350630  | -2.223894 |
| H  | 0.087398  | 1.536367  | 1.481222  |
| C  | 3.098374  | 0.951116  | 1.985777  |
| C  | 5.215784  | 2.262004  | 0.611345  |
| H  | 3.885443  | 3.568866  | -1.588149 |
| H  | 1.404239  | 3.229828  | -1.763358 |
| P  | -4.203397 | -1.359278 | 0.285926  |
| C  | -4.731687 | -2.425026 | -1.094357 |
| C  | -4.804455 | -2.210161 | 1.780574  |
| C  | -5.244135 | 0.131657  | 0.145820  |
| H  | -4.200731 | -3.391871 | -1.045044 |
| H  | -4.487537 | -1.938133 | -2.054849 |
| H  | -4.598055 | -1.591810 | 2.671709  |
| H  | -4.283879 | -3.177165 | 1.894873  |
| H  | -5.821954 | -2.603624 | -1.041502 |
| H  | -5.893365 | -2.388136 | 1.702678  |
| H  | -6.315388 | -0.141193 | 0.104358  |
| H  | -5.067204 | 0.787029  | 1.017548  |
| H  | -4.968935 | 0.689735  | -0.768006 |
| C  | 5.455505  | 1.519378  | 1.759810  |
| C  | 4.406035  | 0.872373  | 2.443284  |
| H  | 6.028763  | 2.771182  | 0.081751  |
| H  | 6.478844  | 1.438357  | 2.144341  |
| H  | 4.629817  | 0.298784  | 3.350134  |
| H  | 2.291525  | 0.438759  | 2.525415  |

15a

SCF Energy: -1574.38310365

ZPE-corrected Energy: -1573.93491

$\Delta U$ : -1573.90520

$\Delta H$ : -1573.90425

$\Delta G$ : -1573.99943

Num. Imaginary Frequencies: 0

|    |           |           |           |
|----|-----------|-----------|-----------|
| N  | 3.525224  | 1.551342  | -1.480400 |
| C  | 2.289140  | 1.792812  | -1.801070 |
| C  | 1.495853  | 2.175397  | -0.606308 |
| C  | 2.494016  | 1.949329  | 0.497857  |
| C  | 3.719768  | 1.606819  | -0.080247 |
| C  | 0.093900  | 1.568559  | -0.495320 |
| C  | -1.033067 | 2.524960  | -0.439637 |
| C  | -0.929237 | 3.712210  | 0.303697  |
| C  | -1.999294 | 4.599220  | 0.399279  |
| C  | -3.196217 | 4.327342  | -0.262190 |
| C  | -3.309391 | 3.164004  | -1.024008 |
| C  | -2.240073 | 2.276185  | -1.114634 |
| C  | -0.048409 | 0.215989  | -0.407012 |
| Au | -1.853139 | -0.796646 | -0.048322 |
| C  | 1.115478  | -0.580217 | -0.456091 |
| C  | 2.153197  | -1.230621 | -0.455189 |
| C  | 3.443477  | -1.834764 | -0.423497 |
| C  | 4.001648  | -2.249171 | 0.800032  |
| C  | 5.296688  | -2.753073 | 0.846085  |
| C  | 6.054869  | -2.855918 | -0.322085 |
| C  | 5.507352  | -2.456881 | -1.541824 |
| C  | 4.211783  | -1.950429 | -1.596618 |
| H  | 7.075583  | -3.252496 | -0.281496 |
| H  | 5.722370  | -3.068045 | 1.805661  |
| H  | 3.407712  | -2.152666 | 1.716563  |
| H  | 3.778385  | -1.636871 | -2.554234 |
| H  | 6.096125  | -2.542363 | -2.462291 |
| H  | -0.002692 | 3.939651  | 0.848749  |
| H  | -1.896375 | 5.509648  | 1.000703  |
| H  | -4.036988 | 5.026762  | -0.192586 |
| H  | -4.237111 | 2.951319  | -1.568275 |
| H  | -2.327106 | 1.381078  | -1.743033 |
| H  | 1.378639  | 3.277651  | -0.748023 |
| C  | 2.384869  | 2.000230  | 1.879465  |
| C  | 4.861531  | 1.313750  | 0.649118  |
| H  | 4.258831  | 1.302393  | -2.150084 |
| H  | 1.946192  | 1.777168  | -2.839433 |
| P  | -3.913921 | -1.895914 | 0.389591  |
| C  | -4.220478 | -3.410289 | -0.581421 |
| C  | -4.156713 | -2.417716 | 2.121240  |
| C  | -5.357688 | -0.835508 | 0.036022  |
| H  | -3.435935 | -4.156664 | -0.364528 |
| H  | -4.188353 | -3.173582 | -1.659690 |
| H  | -4.073073 | -1.540975 | 2.787446  |
| H  | -3.375758 | -3.145912 | 2.403036  |
| H  | -5.209697 | -3.837090 | -0.330595 |
| H  | -5.152507 | -2.881680 | 2.250843  |
| H  | -6.300838 | -1.369900 | 0.257530  |
| H  | -5.302629 | 0.079850  | 0.652523  |
| H  | -5.348017 | -0.539096 | -1.028440 |
| C  | 4.739557  | 1.375648  | 2.036756  |
| C  | 3.520896  | 1.708865  | 2.640121  |
| H  | 5.799504  | 1.027161  | 0.161952  |
| H  | 5.607885  | 1.146209  | 2.663284  |
| H  | 3.455227  | 1.734066  | 3.733114  |
| H  | 1.430099  | 2.238324  | 2.362531  |

16a\_

SCF Energy: -1574.42324357

ZPE-corrected Energy: -1573.97543

$\Delta U$ : -1573.94529

$\Delta H$ : -1573.94434

$\Delta G$ : -1574.04120

Num. Imaginary Frequencies: 0

|    |           |           |           |
|----|-----------|-----------|-----------|
| N  | -0.565278 | 2.389591  | 2.636745  |
| C  | 0.404192  | 1.981276  | 1.778436  |
| C  | -0.110960 | 1.875183  | 0.496536  |
| C  | -1.493058 | 2.290490  | 0.580960  |
| C  | -1.739220 | 2.598062  | 1.941766  |
| C  | 0.644399  | 1.418714  | -0.670201 |
| C  | 1.939241  | 2.073577  | -0.975642 |
| C  | 2.170660  | 3.385705  | -0.530577 |
| C  | 3.348950  | 4.054630  | -0.854591 |
| C  | 4.324056  | 3.425218  | -1.623824 |
| C  | 4.111208  | 2.119818  | -2.072481 |
| C  | 2.934460  | 1.453622  | -1.754498 |
| C  | 0.110423  | 0.469095  | -1.555077 |
| Au | 1.263677  | -0.980979 | -0.125540 |
| C  | -1.173975 | -0.124482 | -1.416266 |
| C  | -2.280026 | -0.624874 | -1.295909 |
| C  | -3.586975 | -1.156096 | -1.104558 |
| C  | -4.146308 | -2.053614 | -2.031571 |
| C  | -5.426109 | -2.559157 | -1.830442 |
| C  | -6.162595 | -2.179236 | -0.707367 |
| C  | -5.615321 | -1.287967 | 0.217766  |
| C  | -4.337049 | -0.776382 | 0.024985  |
| H  | -7.170849 | -2.579512 | -0.552167 |
| H  | -5.855180 | -3.257434 | -2.557771 |
| H  | -3.563106 | -2.347814 | -2.911509 |
| H  | -3.901580 | -0.068875 | 0.741874  |
| H  | -6.193599 | -0.987185 | 1.098652  |
| H  | 1.401859  | 3.899656  | 0.056056  |
| H  | 3.501404  | 5.081129  | -0.503422 |
| H  | 5.253772  | 3.948402  | -1.873499 |
| H  | 4.875805  | 1.611674  | -2.670255 |
| H  | 2.803526  | 0.419809  | -2.099128 |
| H  | 0.601802  | 0.340898  | -2.531142 |
| C  | -2.519387 | 2.503189  | -0.355921 |
| C  | -2.979918 | 3.052627  | 2.397462  |
| H  | -0.442415 | 2.523914  | 3.636283  |
| H  | 1.414361  | 1.757780  | 2.131228  |
| P  | 2.231344  | -2.739096 | 1.062953  |
| C  | 1.061446  | -3.595615 | 2.159426  |
| C  | 2.925570  | -4.028253 | -0.014905 |
| C  | 3.604110  | -2.211734 | 2.132396  |
| H  | 0.227862  | -4.009598 | 1.565863  |
| H  | 0.651882  | -2.882458 | 2.895878  |
| H  | 3.709099  | -3.592886 | -0.659329 |
| H  | 2.130970  | -4.447619 | -0.656426 |
| H  | 1.577205  | -4.416878 | 2.691360  |
| H  | 3.364381  | -4.835527 | 0.600946  |
| H  | 4.029314  | -3.087491 | 2.657254  |
| H  | 4.389955  | -1.734104 | 1.521663  |
| H  | 3.239296  | -1.481252 | 2.875403  |
| C  | -3.984381 | 3.220564  | 1.454555  |
| C  | -3.750835 | 2.960262  | 0.089774  |
| H  | -3.144014 | 3.277463  | 3.457085  |
| H  | -4.970126 | 3.576735  | 1.774797  |
| H  | -4.558876 | 3.123311  | -0.632618 |
| H  | -2.352022 | 2.316805  | -1.422290 |

16a

SCF Energy: -1574.42630254

ZPE-corrected Energy: -1573.97880

$\Delta U$ : -1573.94862

$\Delta H$ : -1573.94768

$\Delta G$ : -1574.04541

Num. Imaginary Frequencies: 0

|    |           |           |           |
|----|-----------|-----------|-----------|
| C  | -4.289614 | 0.019263  | 1.559727  |
| C  | -5.108968 | 0.507600  | 2.567782  |
| C  | -5.263311 | 1.891665  | 2.777851  |
| C  | -4.593779 | 2.815510  | 1.987532  |
| C  | -3.769889 | 2.318019  | 0.974699  |
| C  | -3.610127 | 0.931635  | 0.734861  |
| C  | -2.676797 | 0.804521  | -0.365469 |
| C  | -2.336423 | 2.097365  | -0.731058 |
| N  | -2.984859 | 2.992739  | 0.061424  |
| C  | -2.184171 | -0.414430 | -0.982892 |
| C  | -3.124328 | -1.537424 | -1.168187 |
| C  | -4.458678 | -1.292390 | -1.529534 |
| C  | -5.347973 | -2.346047 | -1.713494 |
| C  | -4.923419 | -3.662117 | -1.525137 |
| C  | -3.602121 | -3.918969 | -1.159080 |
| C  | -2.708500 | -2.865495 | -0.986170 |
| C  | -0.888529 | -0.550467 | -1.413306 |
| C  | 0.127259  | 0.394572  | -1.172192 |
| C  | 1.017387  | 1.236699  | -0.952996 |
| H  | -2.939837 | 4.002766  | -0.039996 |
| H  | -4.178157 | -1.061486 | 1.410372  |
| H  | -5.647105 | -0.195404 | 3.213893  |
| H  | -5.919806 | 2.245073  | 3.581170  |
| H  | -4.702379 | 3.893678  | 2.148910  |
| H  | -1.704516 | 2.435888  | -1.555740 |
| H  | -4.793688 | -0.258797 | -1.678512 |
| H  | -6.383620 | -2.139284 | -2.005720 |
| H  | -5.627201 | -4.491209 | -1.660231 |
| H  | -3.266287 | -4.949625 | -0.998523 |
| H  | -1.677705 | -3.071451 | -0.672372 |
| H  | -0.605858 | -1.444304 | -1.986173 |
| Au | 2.034764  | -0.571902 | -0.015516 |
| P  | 3.401428  | -2.141149 | 1.044625  |
| C  | 3.735313  | -1.745599 | 2.787856  |
| C  | 2.679361  | -3.810612 | 1.059440  |
| C  | 5.034803  | -2.328479 | 0.267673  |
| H  | 4.377122  | -2.528099 | 3.234054  |
| H  | 4.244753  | -0.768767 | 2.859504  |
| H  | 2.784425  | -1.690517 | 3.346077  |
| H  | 2.518971  | -4.157819 | 0.023823  |
| H  | 3.361147  | -4.509598 | 1.578862  |
| H  | 1.707021  | -3.791020 | 1.581982  |
| H  | 5.625654  | -3.087949 | 0.813078  |
| H  | 4.913415  | -2.644873 | -0.783045 |
| H  | 5.571457  | -1.364007 | 0.287305  |
| C  | 1.730226  | 2.485078  | -0.886181 |
| C  | 1.113403  | 3.588655  | -0.272057 |
| C  | 1.771672  | 4.812898  | -0.218926 |
| C  | 3.047149  | 4.948688  | -0.768043 |
| C  | 3.667241  | 3.853396  | -1.371824 |
| C  | 3.018696  | 2.624774  | -1.429002 |
| H  | 0.114807  | 3.471721  | 0.165724  |
| H  | 1.284938  | 5.669866  | 0.259632  |
| H  | 3.563519  | 5.913888  | -0.722528 |
| H  | 4.668979  | 3.958055  | -1.802749 |
| H  | 3.500885  | 1.761726  | -1.903618 |



17a

SCF Energy: -1574.43856740

ZPE-corrected Energy: -1573.98944

$\Delta U$ : -1573.96054

$\Delta H$ : -1573.95959

$\Delta G$ : -1574.05166

Num. Imaginary Frequencies: 0

|    |           |           |           |
|----|-----------|-----------|-----------|
| C  | 5.240023  | 0.376314  | 0.474603  |
| C  | 6.248772  | 1.241257  | 0.835304  |
| C  | 6.018955  | 2.638903  | 0.890425  |
| C  | 4.787512  | 3.194858  | 0.604454  |
| C  | 3.744935  | 2.318139  | 0.261290  |
| C  | 3.964409  | 0.907333  | 0.166494  |
| C  | 2.723150  | 0.321599  | -0.179996 |
| C  | 1.766058  | 1.425225  | -0.434298 |
| N  | 2.452152  | 2.610219  | -0.010645 |
| C  | 2.247247  | -1.003569 | -0.213671 |
| C  | 3.156411  | -2.168095 | -0.241635 |
| C  | 4.151061  | -2.250437 | -1.226981 |
| C  | 5.000480  | -3.351267 | -1.286407 |
| C  | 4.868538  | -4.386198 | -0.359534 |
| C  | 3.880774  | -4.315949 | 0.622110  |
| C  | 3.027098  | -3.215703 | 0.679407  |
| C  | 0.866533  | -1.162792 | -0.113215 |
| C  | -0.118888 | -0.121841 | -0.056355 |
| C  | 0.313206  | 1.182537  | -0.165387 |
| C  | -0.573217 | 2.356013  | -0.216155 |
| C  | -1.619709 | 2.508814  | 0.709930  |
| C  | -0.390643 | 3.356745  | -1.185792 |
| C  | -2.460720 | 3.617166  | 0.654879  |
| C  | -2.277551 | 4.593244  | -0.324955 |
| C  | -1.238492 | 4.459224  | -1.244951 |
| Au | -2.148723 | -0.646615 | 0.042708  |
| P  | -4.465035 | -1.184529 | 0.126664  |
| C  | -5.426197 | 0.034350  | 1.088357  |
| C  | -4.887007 | -2.789654 | 0.885284  |
| C  | -5.298365 | -1.227175 | -1.496494 |
| H  | 2.078773  | 3.550463  | -0.112427 |
| H  | 1.754845  | 1.426586  | -1.565748 |
| H  | 5.418885  | -0.702530 | 0.425053  |
| H  | 7.242739  | 0.852278  | 1.077812  |
| H  | 6.846516  | 3.299622  | 1.172480  |
| H  | 4.618684  | 4.274792  | 0.655047  |
| H  | 4.251184  | -1.440323 | -1.961080 |
| H  | 5.769116  | -3.404870 | -2.065598 |
| H  | 5.539043  | -5.251844 | -0.403364 |
| H  | 3.776103  | -5.123384 | 1.355537  |
| H  | 2.260855  | -3.156491 | 1.462443  |
| H  | 0.510048  | -2.201443 | -0.053871 |
| H  | -1.749540 | 1.761438  | 1.501999  |
| H  | 0.401070  | 3.256623  | -1.939503 |
| H  | -3.263011 | 3.724197  | 1.393885  |
| H  | -2.943021 | 5.462554  | -0.368269 |
| H  | -1.089752 | 5.215554  | -2.023582 |
| H  | -6.502468 | -0.222020 | 1.085508  |
| H  | -5.059733 | 0.055888  | 2.130434  |
| H  | -5.288428 | 1.039403  | 0.650036  |
| H  | -5.983724 | -2.933093 | 0.901256  |
| H  | -4.421437 | -3.607897 | 0.307878  |
| H  | -4.499532 | -2.826946 | 1.918758  |
| H  | -6.375674 | -1.446427 | -1.373441 |
| H  | -5.179836 | -0.251587 | -2.000640 |
| H  | -4.838398 | -2.005839 | -2.130291 |

18a

SCF Energy: -1574.42782627

ZPE-corrected Energy: -1573.97853

$\Delta U$ : -1573.94938

$\Delta H$ : -1573.94843

$\Delta G$ : -1574.04256

Num. Imaginary Frequencies: 0

|    |           |           |           |
|----|-----------|-----------|-----------|
| C  | -0.197021 | -0.593344 | -0.133087 |
| C  | 0.572289  | 0.540113  | -0.185099 |
| C  | 0.121924  | 1.941468  | -0.268377 |
| C  | -0.873405 | 2.292595  | -1.198234 |
| C  | -1.348823 | 3.598015  | -1.284723 |
| C  | -0.831272 | 4.587947  | -0.448615 |
| C  | 0.158647  | 4.258366  | 0.475730  |
| C  | 0.631039  | 2.950120  | 0.566716  |
| H  | -1.266853 | 1.519899  | -1.870890 |
| H  | -2.123495 | 3.847080  | -2.019218 |
| H  | -1.201184 | 5.617326  | -0.517106 |
| H  | 0.562964  | 5.026259  | 1.145166  |
| H  | 1.385655  | 2.706700  | 1.323296  |
| C  | 0.688497  | -1.744834 | -0.138125 |
| C  | 2.006224  | -1.398982 | -0.188973 |
| C  | 3.179148  | -2.269620 | -0.192781 |
| H  | 0.325907  | -2.778245 | -0.102694 |
| Au | -2.268111 | -0.650058 | 0.044698  |
| P  | -4.643440 | -0.668872 | 0.258206  |
| C  | -5.304121 | -1.753964 | 1.568926  |
| H  | -5.002069 | -2.798357 | 1.374841  |
| H  | -4.893283 | -1.447772 | 2.547286  |
| H  | -6.408368 | -1.693559 | 1.601297  |
| C  | -5.349941 | 0.970433  | 0.641278  |
| H  | -4.943310 | 1.333380  | 1.601986  |
| H  | -6.452673 | 0.913726  | 0.709215  |
| C  | -5.538902 | -1.196364 | -1.242926 |
| H  | -5.068528 | 1.689492  | -0.148852 |
| H  | -6.631669 | -1.155940 | -1.075794 |
| H  | -5.248491 | -2.229032 | -1.506144 |
| H  | -5.274835 | -0.533590 | -2.086006 |
| C  | 3.052938  | -3.629856 | 0.147164  |
| C  | 4.156646  | -4.473855 | 0.146476  |
| C  | 5.420016  | -3.983648 | -0.190600 |
| C  | 5.564669  | -2.638836 | -0.524999 |
| C  | 4.458748  | -1.792467 | -0.524452 |
| H  | 2.073729  | -4.030236 | 0.433038  |
| H  | 4.030922  | -5.528045 | 0.418346  |
| H  | 6.289920  | -4.649870 | -0.189439 |
| H  | 6.549719  | -2.239786 | -0.791805 |
| H  | 4.604321  | -0.740382 | -0.796950 |
| C  | 2.282657  | 0.566814  | -1.676639 |
| N  | 3.102933  | 1.584964  | -1.704837 |
| C  | 3.620858  | 1.856990  | -0.412700 |
| C  | 4.520046  | 2.834107  | -0.016633 |
| C  | 4.868098  | 2.844825  | 1.335434  |
| C  | 4.337143  | 1.908619  | 2.230284  |
| C  | 3.424386  | 0.938467  | 1.807467  |
| C  | 3.060159  | 0.928052  | 0.469802  |
| H  | 3.345005  | 2.112786  | -2.546215 |
| H  | 1.791045  | 0.170751  | -2.570035 |
| H  | 4.936839  | 3.556684  | -0.724785 |
| H  | 5.577695  | 3.595502  | 1.698808  |
| H  | 4.643480  | 1.938901  | 3.281247  |
| H  | 3.001609  | 0.211602  | 2.510281  |
| C  | 2.070653  | 0.105109  | -0.290526 |

2a  
SCF Energy: -1211.08985961  
ZPE-corrected Energy: -1210.77538  
 $\Delta U$ : -1210.75188  
 $\Delta H$ : -1210.75094  
 $\Delta G$ : -1210.83407

Num. Imaginary Frequencies: 0

|    |           |           |           |
|----|-----------|-----------|-----------|
| C  | 2.263116  | -3.407703 | 0.834993  |
| C  | 2.025446  | -2.386296 | -0.102300 |
| C  | 3.026257  | -2.041097 | -1.027855 |
| C  | 4.242010  | -2.714396 | -1.015256 |
| C  | 4.473098  | -3.727508 | -0.083225 |
| C  | 3.484024  | -4.072051 | 0.839061  |
| C  | 0.750358  | -1.733395 | -0.104313 |
| C  | -0.453279 | -1.423727 | -0.062375 |
| Au | 0.806350  | 0.595694  | 0.012371  |
| C  | -1.805337 | -1.215738 | -0.059869 |
| C  | -3.015050 | -1.036132 | -0.057256 |
| C  | -4.421492 | -0.838012 | -0.057516 |
| C  | -5.077162 | -0.419084 | -1.230331 |
| C  | -6.453738 | -0.229329 | -1.225418 |
| C  | -7.188380 | -0.456506 | -0.060311 |
| C  | -6.544830 | -0.873500 | 1.106172  |
| C  | -5.168305 | -1.063475 | 1.113958  |
| H  | -4.654377 | -1.390389 | 2.024476  |
| H  | -8.273874 | -0.307748 | -0.061645 |
| H  | -6.960771 | 0.097051  | -2.139916 |
| H  | -4.492688 | -0.246915 | -2.140738 |
| H  | -7.123335 | -1.052138 | 2.019020  |
| H  | 1.480207  | -3.671739 | 1.554066  |
| H  | 3.665708  | -4.867951 | 1.569280  |
| H  | 5.433759  | -4.254066 | -0.076101 |
| H  | 5.017927  | -2.447090 | -1.740537 |
| H  | 2.836783  | -1.247655 | -1.760445 |
| P  | 1.486194  | 2.824201  | 0.138581  |
| C  | 3.148366  | 3.086795  | -0.548997 |
| C  | 1.554679  | 3.455504  | 1.841447  |
| C  | 0.393460  | 3.963870  | -0.761987 |
| H  | 0.552554  | 3.396415  | 2.300675  |
| H  | 2.254699  | 2.845238  | 2.438132  |
| H  | 0.358238  | 3.684439  | -1.829400 |
| H  | -0.627643 | 3.908132  | -0.346204 |
| H  | 1.895556  | 4.507735  | 1.838165  |
| H  | 0.772142  | 4.998503  | -0.665228 |
| H  | 3.426499  | 4.153490  | -0.460217 |
| H  | 3.880588  | 2.470781  | 0.001496  |
| H  | 3.163991  | 2.791702  | -1.612662 |

AuPMe3  
SCF Energy: -596.392670308  
ZPE-corrected Energy: -596.279720  
 $\Delta U$ : -596.271299  
 $\Delta H$ : -596.270354  
 $\Delta G$ : -596.314078  
Num. Imaginary Frequencies: 0

|    |           |           |           |
|----|-----------|-----------|-----------|
| P  | -1.330080 | 0.000581  | 0.000447  |
| C  | -2.016572 | -1.078279 | 1.285961  |
| C  | -2.015855 | -0.576164 | -1.576022 |
| C  | -2.015410 | 1.654267  | 0.289303  |
| Au | 0.957729  | -0.000084 | 0.000021  |
| H  | -1.678594 | 0.081489  | -2.395801 |
| H  | -1.674770 | -1.605853 | -1.779808 |
| H  | -3.120636 | -0.558508 | -1.520007 |
| H  | -1.675747 | 2.344250  | -0.502384 |
| H  | -3.120354 | 1.599223  | 0.280273  |
| H  | -1.675340 | 2.036014  | 1.267261  |
| H  | -1.679001 | -0.740251 | 2.280749  |
| H  | -3.121345 | -1.041207 | 1.239614  |
| H  | -1.676568 | -2.116166 | 1.126329  |

P

SCF Energy: -978.090456570  
ZPE-corrected Energy: -977.753166  
 $\Delta U$ : -977.734831  
 $\Delta H$ : -977.733887  
 $\Delta G$ : -977.800394

Num. Imaginary Frequencies: 0

|   |           |           |           |
|---|-----------|-----------|-----------|
| C | -2.300008 | 2.099306  | -0.089639 |
| C | -2.412657 | 3.484974  | -0.074501 |
| C | -1.272743 | 4.301183  | 0.016537  |
| C | 0.000903  | 3.748887  | 0.079067  |
| C | 0.108220  | 2.356594  | 0.053891  |
| C | -1.028337 | 1.510637  | -0.013997 |
| C | -0.524544 | 0.147572  | -0.019289 |
| C | 0.892523  | 0.245997  | 0.006057  |
| C | 1.737071  | -0.877618 | -0.025700 |
| C | 1.101175  | -2.119788 | -0.078208 |
| C | -0.292211 | -2.241369 | -0.101510 |
| C | -1.130585 | -1.124470 | -0.059675 |
| N | 1.243784  | 1.577538  | 0.066261  |
| C | -2.598646 | -1.318515 | -0.028735 |
| C | -3.237875 | -2.082596 | -1.014166 |
| C | -4.614221 | -2.299468 | -0.967382 |
| C | -5.372527 | -1.762514 | 0.072169  |
| C | -4.745457 | -1.009996 | 1.066276  |
| C | -3.371061 | -0.790666 | 1.015735  |
| C | 3.210920  | -0.762334 | -0.002520 |
| C | 3.883860  | 0.143518  | -0.838162 |
| C | 5.274220  | 0.235763  | -0.820295 |
| C | 6.020452  | -0.578057 | 0.031194  |
| C | 5.365476  | -1.488214 | 0.861037  |
| C | 3.975650  | -1.578907 | 0.844075  |
| H | -3.198917 | 1.477644  | -0.165305 |
| H | -3.404551 | 3.947256  | -0.134504 |
| H | -1.387749 | 5.391349  | 0.032338  |
| H | 0.894998  | 4.379346  | 0.138846  |
| H | 1.719460  | -3.025352 | -0.116144 |
| H | -0.744406 | -3.240302 | -0.131402 |
| H | 2.192782  | 1.928079  | 0.148593  |
| H | -2.643097 | -2.501117 | -1.835949 |
| H | -5.098476 | -2.892022 | -1.752358 |
| H | -6.454576 | -1.933373 | 0.110625  |
| H | -5.332531 | -0.594976 | 1.893909  |
| H | -2.879470 | -0.207793 | 1.805183  |
| H | 3.310546  | 0.764570  | -1.538398 |
| H | 5.779433  | 0.944406  | -1.486826 |
| H | 7.113866  | -0.504597 | 0.046861  |
| H | 5.943166  | -2.131045 | 1.535391  |
| H | 3.465465  | -2.284347 | 1.511763  |

TS\_12a1\_13a\_  
 SCF Energy: -1574.36015784  
 ZPE-corrected Energy: -1573.91699  
 $\Delta U$ : -1573.88703  
 $\Delta H$ : -1573.88608  
 $\Delta G$ : -1573.98314

Num. Imaginary Frequencies: 1  
 Imaginary Frequency: -960.4413

|    |           |           |           |
|----|-----------|-----------|-----------|
| N  | 3.075626  | -0.809260 | -0.312492 |
| C  | 2.001480  | -1.658847 | -0.115489 |
| C  | 2.481494  | -2.937572 | 0.125283  |
| C  | 3.900834  | -2.871381 | 0.082304  |
| C  | 4.239449  | -1.520342 | -0.201974 |
| C  | 0.602843  | -1.245594 | -0.151311 |
| C  | -0.404696 | -2.337937 | 0.022052  |
| C  | -0.615856 | -3.288809 | -0.980589 |
| C  | -1.591280 | -4.270847 | -0.816979 |
| C  | -2.343347 | -4.319644 | 0.356480  |
| C  | -2.118858 | -3.386980 | 1.370081  |
| C  | -1.155647 | -2.395082 | 1.202313  |
| C  | 0.114626  | 0.103475  | -0.122840 |
| Au | -1.979819 | 0.473610  | -0.092089 |
| C  | 0.955550  | 1.224329  | -0.104929 |
| C  | 1.600447  | 2.264972  | -0.033814 |
| C  | 2.372937  | 3.453191  | 0.054199  |
| C  | 3.749013  | 3.383891  | 0.346914  |
| C  | 4.502697  | 4.547458  | 0.432891  |
| C  | 3.896241  | 5.788282  | 0.226944  |
| C  | 2.532812  | 5.868297  | -0.063765 |
| C  | 1.770818  | 4.709904  | -0.149063 |
| H  | 4.493581  | 6.704332  | 0.294727  |
| H  | 5.572004  | 4.489574  | 0.662524  |
| H  | 4.215687  | 2.405332  | 0.511004  |
| H  | 0.700062  | 4.759679  | -0.375286 |
| H  | 2.061962  | 6.844208  | -0.223721 |
| H  | -0.021339 | -3.249205 | -1.902438 |
| H  | -1.764801 | -5.003093 | -1.613063 |
| H  | -3.107084 | -5.094792 | 0.485064  |
| H  | -2.698222 | -3.431916 | 2.299046  |
| H  | -0.974996 | -1.658360 | 1.995138  |
| H  | 1.868879  | -3.817770 | 0.326120  |
| C  | 4.930314  | -3.818857 | 0.253843  |
| C  | 5.569989  | -1.097914 | -0.321977 |
| H  | 3.007931  | 0.185253  | -0.511625 |
| H  | 0.287403  | -0.667865 | -1.255448 |
| P  | -4.323920 | 0.739416  | -0.013615 |
| C  | -5.179286 | -0.506898 | -1.032046 |
| C  | -5.000130 | 0.499478  | 1.661761  |
| C  | -4.989943 | 2.341429  | -0.566662 |
| H  | -4.869048 | -1.517815 | -0.710715 |
| H  | -4.902127 | -0.376067 | -2.092977 |
| H  | -4.594080 | 1.267678  | 2.343138  |
| H  | -4.702765 | -0.496128 | 2.037739  |
| H  | -6.275772 | -0.407773 | -0.925631 |
| H  | -6.103918 | 0.570295  | 1.646405  |
| H  | -6.093504 | 2.341781  | -0.493598 |
| H  | -4.582134 | 3.151976  | 0.062432  |
| H  | -4.693603 | 2.525966  | -1.613999 |
| C  | 6.243229  | -3.402341 | 0.135985  |
| C  | 6.557626  | -2.053521 | -0.149534 |
| H  | 5.815168  | -0.053316 | -0.542596 |
| H  | 7.609492  | -1.757692 | -0.235582 |
| H  | 7.057596  | -4.124047 | 0.264777  |
| H  | 4.688632  | -4.864677 | 0.474804  |

TS\_12a\_12a1  
SCF Energy: -1574.33118466  
ZPE-corrected Energy: -1573.88867  
 $\Delta U$ : -1573.85863  
 $\Delta H$ : -1573.85769  
 $\Delta G$ : -1573.95499

Num. Imaginary Frequencies: 1  
Imaginary Frequency: -1136.0767

|    |           |           |           |
|----|-----------|-----------|-----------|
| N  | -2.969394 | -0.799495 | 0.382048  |
| C  | -1.989620 | -1.604946 | -0.182636 |
| C  | -2.570668 | -2.853789 | -0.491503 |
| C  | -3.919076 | -2.797425 | -0.092053 |
| C  | -4.138616 | -1.497814 | 0.455100  |
| C  | -0.527230 | -1.215863 | -0.286091 |
| C  | 0.422764  | -2.358408 | -0.399866 |
| C  | 0.465111  | -3.335946 | 0.601320  |
| C  | 1.422207  | -4.346195 | 0.557613  |
| C  | 2.334816  | -4.399798 | -0.497089 |
| C  | 2.286595  | -3.440978 | -1.508716 |
| C  | 1.336358  | -2.422537 | -1.458884 |
| C  | -0.073692 | 0.097020  | -0.175038 |
| Au | 1.984615  | 0.469330  | 0.061953  |
| C  | -0.910234 | 1.210206  | -0.196381 |
| C  | -1.591424 | 2.233277  | -0.228798 |
| C  | -2.403205 | 3.397152  | -0.263170 |
| C  | -3.783275 | 3.293578  | -0.529847 |
| C  | -4.577626 | 4.432900  | -0.559037 |
| C  | -4.010532 | 5.686625  | -0.321225 |
| C  | -2.644347 | 5.801827  | -0.055926 |
| C  | -1.842159 | 4.667924  | -0.027686 |
| H  | -4.639812 | 6.583361  | -0.343683 |
| H  | -5.649245 | 4.345594  | -0.768801 |
| H  | -4.219618 | 2.305625  | -0.718858 |
| H  | -0.769031 | 4.747290  | 0.178497  |
| H  | -2.202590 | 6.787004  | 0.129363  |
| H  | -0.252390 | -3.292766 | 1.430883  |
| H  | 1.458087  | -5.097339 | 1.354566  |
| H  | 3.084383  | -5.198421 | -0.533141 |
| H  | 2.993415  | -3.486264 | -2.344954 |
| H  | 1.296797  | -1.663588 | -2.250697 |
| H  | -2.049847 | -3.683365 | -0.973208 |
| C  | -4.987166 | -3.722518 | -0.140879 |
| C  | -5.388157 | -1.109019 | 0.955050  |
| H  | -2.803899 | 0.136202  | 0.746798  |
| H  | -1.449003 | -1.207300 | -1.278851 |
| P  | 4.313824  | 0.800984  | 0.346692  |
| C  | 4.836338  | 1.104280  | 2.066872  |
| C  | 5.279153  | -0.656013 | -0.174902 |
| C  | 5.029135  | 2.185220  | -0.599965 |
| H  | 4.515769  | 0.262421  | 2.705542  |
| H  | 4.363723  | 2.029070  | 2.442178  |
| H  | 5.092752  | -0.858101 | -1.244959 |
| H  | 4.959933  | -1.539347 | 0.407090  |
| H  | 5.936263  | 1.207025  | 2.122697  |
| H  | 6.360649  | -0.484031 | -0.018323 |
| H  | 6.121119  | 2.241314  | -0.432506 |
| H  | 4.832081  | 2.039796  | -1.676775 |
| H  | 4.562370  | 3.134352  | -0.282760 |
| C  | -6.214833 | -3.335635 | 0.352081  |
| C  | -6.409385 | -2.040893 | 0.895045  |
| H  | -5.544867 | -0.110201 | 1.374884  |
| H  | -7.399976 | -1.770596 | 1.277744  |
| H  | -7.058092 | -4.034054 | 0.327917  |
| H  | -4.832517 | -4.722451 | -0.559955 |

TS\_13a\_14a  
 SCF Energy: -1574.40490965  
 ZPE-corrected Energy: -1573.95783  
 $\Delta U$ : -1573.92855  
 $\Delta H$ : -1573.92760  
 $\Delta G$ : -1574.02176

Num. Imaginary Frequencies: 1  
 Imaginary Frequency: -444.7518

|    |           |           |           |
|----|-----------|-----------|-----------|
| C  | -3.231030 | 1.848761  | -0.336660 |
| C  | -3.942765 | 1.279949  | 0.744098  |
| N  | -3.617256 | -0.068129 | 0.797170  |
| C  | -2.720836 | -0.366381 | -0.176701 |
| C  | -2.419632 | 0.798865  | -0.897760 |
| C  | -2.061764 | -1.659893 | -0.304853 |
| C  | -2.868185 | -2.891951 | -0.250997 |
| C  | -4.188153 | -2.889457 | -0.732812 |
| C  | -4.955648 | -4.050736 | -0.715090 |
| C  | -4.421216 | -5.235209 | -0.209996 |
| C  | -3.114791 | -5.249493 | 0.280731  |
| C  | -2.346402 | -4.090143 | 0.263974  |
| C  | -3.377841 | 3.212118  | -0.616869 |
| C  | -4.786139 | 2.031297  | 1.560883  |
| H  | -3.919464 | -0.719833 | 1.518991  |
| H  | -1.984953 | 0.797023  | -1.902711 |
| H  | -4.613851 | -1.967116 | -1.147271 |
| H  | -5.979987 | -4.030067 | -1.103538 |
| H  | -5.026024 | -6.148710 | -0.191674 |
| H  | -2.693067 | -6.172814 | 0.693519  |
| H  | -1.333711 | -4.108675 | 0.682984  |
| C  | -0.700468 | -1.656703 | -0.390193 |
| C  | 0.091763  | -0.445728 | -0.289426 |
| C  | -0.305987 | 0.789242  | -0.288713 |
| Au | 2.205782  | -0.516142 | 0.007385  |
| H  | -0.175371 | -2.615190 | -0.476920 |
| C  | -0.029199 | 2.194330  | -0.359121 |
| C  | 0.569107  | 2.741821  | -1.509801 |
| C  | 0.827388  | 4.105748  | -1.576945 |
| C  | 0.492527  | 4.933724  | -0.502398 |
| C  | -0.104443 | 4.400318  | 0.641020  |
| C  | -0.374997 | 3.038722  | 0.711480  |
| H  | 0.830031  | 2.078150  | -2.343126 |
| H  | 1.296798  | 4.529385  | -2.471473 |
| H  | 0.698842  | 6.008429  | -0.558551 |
| H  | -0.366890 | 5.053440  | 1.480269  |
| H  | -0.860149 | 2.608132  | 1.596084  |
| P  | 4.541864  | -0.669813 | 0.319646  |
| C  | 5.441061  | -1.287689 | -1.140069 |
| C  | 5.343162  | 0.918575  | 0.716068  |
| C  | 5.037211  | -1.784666 | 1.673582  |
| H  | 6.526566  | -1.331043 | -0.932307 |
| H  | 5.078818  | -2.297765 | -1.400678 |
| H  | 5.260665  | -0.617433 | -1.998877 |
| H  | 6.139016  | -1.804546 | 1.770044  |
| H  | 4.594438  | -1.436470 | 2.623319  |
| H  | 4.670528  | -2.805840 | 1.468454  |
| H  | 6.432385  | 0.775150  | 0.845650  |
| H  | 5.164477  | 1.640417  | -0.100194 |
| H  | 4.915253  | 1.328929  | 1.647611  |
| C  | -4.217778 | 3.969089  | 0.191691  |
| C  | -4.910854 | 3.385384  | 1.267140  |
| H  | -5.326171 | 1.575113  | 2.397223  |
| H  | -5.564773 | 4.009410  | 1.886544  |
| H  | -4.343039 | 5.039178  | -0.007840 |
| H  | -2.828847 | 3.672686  | -1.447407 |



TS\_15a1\_16a\_  
 SCF Energy: -1574.36363620  
 ZPE-corrected Energy: -1573.92012  
 $\Delta U$ : -1573.89032  
 $\Delta H$ : -1573.88938  
 $\Delta G$ : -1573.98507

Num. Imaginary Frequencies: 1  
 Imaginary Frequency: -973.9968

|    |           |           |           |
|----|-----------|-----------|-----------|
| N  | 3.307758  | 3.447628  | -0.940327 |
| C  | 1.979510  | 3.186845  | -1.020365 |
| C  | 1.653568  | 2.135314  | -0.178837 |
| C  | 2.875866  | 1.759161  | 0.496827  |
| C  | 3.890649  | 2.604755  | -0.015342 |
| C  | 0.308525  | 1.559927  | -0.102480 |
| C  | -0.830443 | 2.503135  | -0.276706 |
| C  | -0.907683 | 3.654895  | 0.518192  |
| C  | -1.969372 | 4.541946  | 0.369441  |
| C  | -2.949847 | 4.300426  | -0.593996 |
| C  | -2.866276 | 3.171403  | -1.408481 |
| C  | -1.814033 | 2.271947  | -1.248159 |
| C  | 0.052419  | 0.147728  | -0.065806 |
| Au | -1.883396 | -0.700026 | 0.108525  |
| C  | 1.121319  | -0.755702 | -0.168473 |
| C  | 2.017905  | -1.578096 | -0.301132 |
| C  | 3.126972  | -2.453206 | -0.454657 |
| C  | 2.965308  | -3.848905 | -0.376396 |
| C  | 4.064523  | -4.687041 | -0.521359 |
| C  | 5.332049  | -4.145183 | -0.742806 |
| C  | 5.503456  | -2.761325 | -0.821004 |
| C  | 4.409955  | -1.916150 | -0.679511 |
| H  | 6.196698  | -4.808967 | -0.855310 |
| H  | 3.934824  | -5.773093 | -0.460452 |
| H  | 1.966146  | -4.262776 | -0.200499 |
| H  | 4.529330  | -0.827040 | -0.733148 |
| H  | 6.499882  | -2.340148 | -0.993680 |
| H  | -0.133248 | 3.842334  | 1.272181  |
| H  | -2.032514 | 5.429152  | 1.008890  |
| H  | -3.781365 | 5.003498  | -0.716814 |
| H  | -3.622435 | 2.991879  | -2.180877 |
| H  | -1.734820 | 1.396844  | -1.904685 |
| H  | 0.131588  | 0.950243  | 1.035112  |
| C  | 3.206284  | 0.858618  | 1.524368  |
| C  | 5.215784  | 2.540623  | 0.422122  |
| H  | 3.795539  | 4.160818  | -1.475041 |
| H  | 1.333925  | 3.746474  | -1.700251 |
| P  | -4.048943 | -1.632945 | 0.276107  |
| C  | -4.679823 | -1.766248 | 1.980577  |
| C  | -5.301800 | -0.640049 | -0.600742 |
| C  | -4.217217 | -3.311673 | -0.412453 |
| H  | -4.692447 | -0.767315 | 2.451129  |
| H  | -4.019503 | -2.424649 | 2.571804  |
| H  | -5.042472 | -0.576494 | -1.672659 |
| H  | -5.319840 | 0.382847  | -0.183638 |
| H  | -5.704661 | -2.182372 | 1.979171  |
| H  | -6.303931 | -1.096062 | -0.493849 |
| H  | -5.261153 | -3.663848 | -0.315278 |
| H  | -3.931051 | -3.307582 | -1.478994 |
| H  | -3.547168 | -4.003330 | 0.127966  |
| C  | 5.517946  | 1.619973  | 1.416105  |
| C  | 4.518984  | 0.797595  | 1.970393  |
| H  | 5.981345  | 3.201319  | 0.001051  |
| H  | 6.547003  | 1.542513  | 1.784726  |
| H  | 4.784168  | 0.094056  | 2.767759  |
| H  | 2.447127  | 0.210290  | 1.976665  |

TS\_15a\_15a1  
SCF Energy: -1574.33525489  
ZPE-corrected Energy: -1573.89189  
 $\Delta U$ : -1573.86206  
 $\Delta H$ : -1573.86111  
 $\Delta G$ : -1573.95703

Num. Imaginary Frequencies: 1  
Imaginary Frequency: -1145.8692

|    |           |           |           |
|----|-----------|-----------|-----------|
| N  | -4.519489 | -0.559619 | 0.829487  |
| C  | -3.295405 | -0.030652 | 0.701713  |
| C  | -2.424233 | -0.993687 | 0.155128  |
| C  | -3.236174 | -2.191650 | -0.070765 |
| C  | -4.536459 | -1.870021 | 0.374720  |
| C  | -0.908384 | -0.855540 | -0.030062 |
| C  | -0.163763 | -2.144752 | -0.077252 |
| C  | -0.176012 | -2.984907 | 1.040704  |
| C  | 0.556823  | -4.169485 | 1.037493  |
| C  | 1.295370  | -4.530892 | -0.090109 |
| C  | 1.306195  | -3.700388 | -1.211291 |
| C  | 0.583381  | -2.508554 | -1.202936 |
| C  | -0.221957 | 0.357250  | -0.021479 |
| Au | 1.882401  | 0.345331  | 0.030651  |
| C  | -0.848489 | 1.601349  | -0.055108 |
| C  | -1.326917 | 2.732200  | -0.097843 |
| C  | -1.915612 | 4.024129  | -0.137035 |
| C  | -1.124882 | 5.176580  | 0.038879  |
| C  | -1.709368 | 6.436802  | 0.010866  |
| C  | -3.083730 | 6.567100  | -0.199175 |
| C  | -3.877161 | 5.432593  | -0.380299 |
| C  | -3.301327 | 4.168437  | -0.348134 |
| H  | -3.540559 | 7.562790  | -0.223789 |
| H  | -1.088916 | 7.328670  | 0.151484  |
| H  | -0.047026 | 5.064221  | 0.200631  |
| H  | -3.916341 | 3.272516  | -0.493649 |
| H  | -4.954730 | 5.537002  | -0.548057 |
| H  | -0.769260 | -2.702796 | 1.920202  |
| H  | 0.549333  | -4.818150 | 1.920654  |
| H  | 1.864338  | -5.467524 | -0.095872 |
| H  | 1.881231  | -3.983453 | -2.100282 |
| H  | 0.588227  | -1.850952 | -2.081777 |
| H  | -1.800493 | -0.651934 | -0.948766 |
| C  | -3.005975 | -3.465678 | -0.610606 |
| C  | -5.603106 | -2.766091 | 0.319643  |
| H  | -5.327054 | -0.061977 | 1.199386  |
| H  | -3.079374 | 0.989561  | 1.020086  |
| P  | 4.248846  | 0.223738  | 0.085894  |
| C  | 4.852706  | -1.414448 | -0.443197 |
| C  | 5.120996  | 1.405171  | -0.995013 |
| C  | 4.998629  | 0.472650  | 1.729517  |
| H  | 4.514516  | -1.618225 | -1.475095 |
| H  | 4.433816  | -2.193025 | 0.219799  |
| H  | 4.880109  | 2.438408  | -0.688552 |
| H  | 4.794616  | 1.264556  | -2.040507 |
| H  | 5.957564  | -1.455236 | -0.405031 |
| H  | 6.214261  | 1.250316  | -0.929543 |
| H  | 6.097786  | 0.361846  | 1.670740  |
| H  | 4.753248  | 1.482221  | 2.103351  |
| H  | 4.594082  | -0.271371 | 2.438276  |
| C  | -5.347154 | -4.023310 | -0.209781 |
| C  | -4.064496 | -4.363840 | -0.672640 |
| H  | -6.597618 | -2.483250 | 0.680130  |
| H  | -6.156627 | -4.758857 | -0.270393 |
| H  | -3.893934 | -5.361628 | -1.091525 |
| H  | -2.018078 | -3.755843 | -0.983812 |

TS\_16a\_18a  
SCF Energy: -1574.40844232  
ZPE-corrected Energy: -1573.96124  
 $\Delta U$ : -1573.93187  
 $\Delta H$ : -1573.93092  
 $\Delta G$ : -1574.02567

Num. Imaginary Frequencies: 1

Imaginary Frequency: -379.4592

|    |           |           |           |
|----|-----------|-----------|-----------|
| C  | -0.175547 | -0.560575 | -0.290325 |
| C  | 0.334505  | 0.615148  | -0.529314 |
| C  | 0.266391  | 2.043953  | -0.533925 |
| C  | 0.370238  | 2.787184  | -1.723980 |
| C  | 0.333163  | 4.176631  | -1.686939 |
| C  | 0.190823  | 4.837826  | -0.465758 |
| C  | 0.074636  | 4.111959  | 0.722017  |
| C  | 0.118488  | 2.724217  | 0.692191  |
| H  | 0.474308  | 2.258360  | -2.678601 |
| H  | 0.410981  | 4.750746  | -2.616512 |
| H  | 0.164359  | 5.933036  | -0.439822 |
| H  | -0.044801 | 4.635115  | 1.677005  |
| H  | 0.038358  | 2.139517  | 1.616469  |
| C  | 0.680023  | -1.728552 | -0.183607 |
| C  | 2.016886  | -1.502982 | -0.280460 |
| C  | 3.069957  | -2.525331 | -0.191498 |
| H  | 0.251273  | -2.723317 | -0.026072 |
| Au | -2.276295 | -0.564947 | -0.035346 |
| P  | -4.622639 | -0.642736 | 0.256211  |
| C  | -5.254249 | 0.406691  | 1.606545  |
| H  | -4.798054 | 0.097756  | 2.563428  |
| H  | -4.987566 | 1.460874  | 1.414494  |
| H  | -6.354394 | 0.315437  | 1.679564  |
| C  | -5.572046 | -0.116970 | -1.208814 |
| H  | -5.315456 | 0.926561  | -1.463324 |
| H  | -6.657380 | -0.187569 | -1.007265 |
| C  | -5.255564 | -2.309180 | 0.637394  |
| H  | -5.317978 | -0.760973 | -2.069071 |
| H  | -6.355227 | -2.285340 | 0.754353  |
| H  | -4.796973 | -2.676438 | 1.572488  |
| H  | -4.990559 | -3.003206 | -0.179601 |
| C  | 2.762620  | -3.886234 | -0.007044 |
| C  | 3.767433  | -4.841327 | 0.079573  |
| C  | 5.109476  | -4.465194 | -0.015168 |
| C  | 5.432715  | -3.122827 | -0.197198 |
| C  | 4.425397  | -2.164490 | -0.283545 |
| H  | 1.718776  | -4.209792 | 0.069266  |
| H  | 3.501124  | -5.894745 | 0.222326  |
| H  | 5.900470  | -5.220407 | 0.053592  |
| H  | 6.481321  | -2.813468 | -0.271886 |
| H  | 4.701304  | -1.112096 | -0.423001 |
| C  | 2.693529  | 0.490937  | -1.732029 |
| N  | 3.271952  | 1.690993  | -1.552177 |
| C  | 3.427815  | 1.946231  | -0.193923 |
| C  | 3.962507  | 3.057033  | 0.457686  |
| C  | 3.992979  | 3.018679  | 1.846817  |
| C  | 3.503896  | 1.908884  | 2.560703  |
| C  | 2.964492  | 0.809903  | 1.902401  |
| C  | 2.923244  | 0.830436  | 0.504942  |
| H  | 3.520511  | 2.334846  | -2.300483 |
| H  | 2.502461  | 0.090515  | -2.730269 |
| H  | 4.342458  | 3.918909  | -0.100713 |
| H  | 4.410025  | 3.869140  | 2.397509  |
| H  | 3.552745  | 1.914007  | 3.655294  |
| H  | 2.577987  | -0.053342 | 2.458314  |
| C  | 2.391720  | -0.086922 | -0.488924 |

TS\_18a\_17a  
SCF Energy: -1574.40621283  
ZPE-corrected Energy: -1573.95811  
 $\Delta U$ : -1573.92949  
 $\Delta H$ : -1573.92855  
 $\Delta G$ : -1574.02106

Num. Imaginary Frequencies: 1  
Imaginary Frequency: -140.4639

|    |           |           |           |
|----|-----------|-----------|-----------|
| C  | 0.002523  | -0.546675 | -0.579833 |
| C  | 0.482949  | 0.685986  | -0.901195 |
| C  | -0.206449 | 1.966739  | -0.643727 |
| C  | -0.573435 | 2.821114  | -1.694060 |
| C  | -1.255831 | 4.006213  | -1.436523 |
| C  | -1.565481 | 4.364104  | -0.122423 |
| C  | -1.193842 | 3.530024  | 0.930726  |
| C  | -0.518237 | 2.337902  | 0.671852  |
| H  | -0.337827 | 2.538362  | -2.729038 |
| H  | -1.552731 | 4.656088  | -2.267503 |
| H  | -2.098460 | 5.300175  | 0.079577  |
| H  | -1.429321 | 3.809605  | 1.963915  |
| H  | -0.221282 | 1.675837  | 1.495803  |
| C  | 0.969670  | -1.635420 | -0.489749 |
| C  | 2.268446  | -1.275007 | -0.337883 |
| C  | 3.432946  | -2.150171 | -0.209912 |
| H  | 0.649368  | -2.682855 | -0.511900 |
| Au | -2.015933 | -0.808480 | -0.110030 |
| P  | -4.319143 | -1.032351 | 0.453418  |
| C  | -4.866351 | 0.207311  | 1.676236  |
| H  | -4.285433 | 0.091498  | 2.608476  |
| H  | -4.688300 | 1.222458  | 1.278216  |
| H  | -5.942829 | 0.084482  | 1.898980  |
| C  | -5.474732 | -0.815577 | -0.942410 |
| H  | -5.320093 | 0.176824  | -1.401637 |
| H  | -6.521150 | -0.896982 | -0.592391 |
| C  | -4.805148 | -2.630046 | 1.188466  |
| H  | -5.285089 | -1.588494 | -1.708005 |
| H  | -5.883474 | -2.627028 | 1.435582  |
| H  | -4.220997 | -2.811004 | 2.107994  |
| H  | -4.597453 | -3.447423 | 0.475524  |
| C  | 3.276545  | -3.529061 | 0.027725  |
| C  | 4.382654  | -4.360247 | 0.138166  |
| C  | 5.673483  | -3.838924 | 0.012063  |
| C  | 5.845475  | -2.476752 | -0.221647 |
| C  | 4.737695  | -1.639065 | -0.327343 |
| H  | 2.273207  | -3.953746 | 0.143525  |
| H  | 4.239054  | -5.429430 | 0.330130  |
| H  | 6.544358  | -4.497784 | 0.101239  |
| H  | 6.852568  | -2.057130 | -0.322058 |
| H  | 4.892815  | -0.569964 | -0.516230 |
| C  | 1.965012  | 0.883932  | -1.612708 |
| N  | 2.450187  | 2.201561  | -1.503424 |
| C  | 2.962960  | 2.402481  | -0.264710 |
| C  | 3.411927  | 3.582788  | 0.347787  |
| C  | 3.892975  | 3.477825  | 1.639086  |
| C  | 3.932910  | 2.245371  | 2.343358  |
| C  | 3.477362  | 1.085206  | 1.759821  |
| C  | 2.984556  | 1.156325  | 0.436856  |
| H  | 2.266969  | 2.938410  | -2.179551 |
| H  | 1.978206  | 0.427869  | -2.613537 |
| H  | 3.381267  | 4.541298  | -0.178888 |
| H  | 4.256955  | 4.380666  | 2.142162  |
| H  | 4.327769  | 2.228906  | 3.364146  |
| H  | 3.492559  | 0.128090  | 2.292609  |
| C  | 2.446738  | 0.194545  | -0.435031 |

TS\_2a\_12a  
 SCF Energy: -1574.3380304  
 ZPE-corrected Energy: -1573.89389  
 $\Delta U$ : -1573.86328  
 $\Delta H$ : -1573.86234  
 $\Delta G$ : -1573.96174

Num. Imaginary Frequencies: 1  
 Imaginary Frequency: -523.6491

|    |           |           |           |
|----|-----------|-----------|-----------|
| N  | -1.729186 | 3.239471  | 0.086458  |
| C  | -1.563538 | 2.567448  | -1.125801 |
| C  | -2.644188 | 1.684731  | -1.274073 |
| C  | -3.412546 | 1.745430  | -0.092125 |
| C  | -2.801244 | 2.724544  | 0.747551  |
| C  | 0.193049  | 1.378428  | -0.685133 |
| C  | 1.188066  | 2.426044  | -0.646304 |
| C  | 1.744414  | 2.936205  | -1.831009 |
| C  | 2.716157  | 3.928970  | -1.773039 |
| C  | 3.135461  | 4.426900  | -0.537859 |
| C  | 2.583395  | 3.929726  | 0.643707  |
| C  | 1.610804  | 2.936314  | 0.593998  |
| C  | -0.037773 | 0.122507  | -0.479323 |
| Au | 1.838624  | -0.847358 | 0.005172  |
| C  | -1.145131 | -0.717297 | -0.505679 |
| C  | -2.135755 | -1.432606 | -0.523824 |
| C  | -3.376231 | -2.128396 | -0.543461 |
| C  | -3.945903 | -2.601388 | 0.652542  |
| C  | -5.198397 | -3.204967 | 0.637518  |
| C  | -5.895111 | -3.348383 | -0.563637 |
| C  | -5.333028 | -2.888703 | -1.755903 |
| C  | -4.081550 | -2.282182 | -1.751118 |
| H  | -6.882972 | -3.822435 | -0.570880 |
| H  | -5.638503 | -3.565985 | 1.573804  |
| H  | -3.398454 | -2.475347 | 1.593491  |
| H  | -3.637849 | -1.910719 | -2.682269 |
| H  | -5.878175 | -3.001919 | -2.699621 |
| H  | 1.409944  | 2.539126  | -2.797063 |
| H  | 3.153049  | 4.317845  | -2.699111 |
| H  | 3.899812  | 5.210764  | -0.496105 |
| H  | 2.915229  | 4.319135  | 1.612333  |
| H  | 1.173060  | 2.532422  | 1.515302  |
| H  | -2.838901 | 1.068112  | -2.154317 |
| C  | -4.560043 | 1.055560  | 0.362545  |
| C  | -3.305550 | 3.015575  | 2.024951  |
| H  | -1.090787 | 3.939634  | 0.454666  |
| H  | -1.027872 | 3.056225  | -1.944326 |
| P  | 3.812836  | -2.012118 | 0.525865  |
| C  | 3.853557  | -3.705992 | -0.140852 |
| C  | 5.325095  | -1.222576 | -0.112075 |
| C  | 4.104549  | -2.206303 | 2.312852  |
| H  | 3.767106  | -3.675632 | -1.241292 |
| H  | 3.005789  | -4.286689 | 0.262982  |
| H  | 5.422551  | -0.207626 | 0.311759  |
| H  | 5.267602  | -1.141421 | -1.211746 |
| H  | 4.802853  | -4.199977 | 0.139112  |
| H  | 6.212050  | -1.822892 | 0.164662  |
| H  | 5.041602  | -2.768404 | 2.485500  |
| H  | 4.180972  | -1.212710 | 2.788274  |
| H  | 3.261220  | -2.752282 | 2.770854  |
| C  | -5.055008 | 1.350628  | 1.615275  |
| C  | -4.429488 | 2.323121  | 2.436389  |
| H  | -2.828498 | 3.766389  | 2.663378  |
| H  | -4.852134 | 2.531791  | 3.425950  |
| H  | -5.943520 | 0.829524  | 1.988825  |
| H  | -5.039070 | 0.299780  | -0.272638 |

TS\_2a\_15a  
 SCF Energy: -1574.34789752  
 ZPE-corrected Energy: -1573.90369  
 $\Delta U$ : -1573.87307  
 $\Delta H$ : -1573.87213  
 $\Delta G$ : -1573.97026

Num. Imaginary Frequencies: 1  
 Imaginary Frequency: -435.5541

|    |           |           |           |
|----|-----------|-----------|-----------|
| N  | 2.369553  | 2.896986  | -1.550146 |
| C  | 1.222884  | 3.404345  | -1.054217 |
| C  | 1.172633  | 3.196174  | 0.329480  |
| C  | 2.430496  | 2.580746  | 0.685183  |
| C  | 3.144213  | 2.384575  | -0.517519 |
| C  | -0.372757 | 1.619651  | 0.009710  |
| C  | -1.574494 | 2.425691  | -0.014819 |
| C  | -2.120456 | 2.937633  | 1.173510  |
| C  | -3.303693 | 3.667740  | 1.139567  |
| C  | -3.947877 | 3.900697  | -0.076766 |
| C  | -3.408799 | 3.400033  | -1.262787 |
| C  | -2.226505 | 2.667500  | -1.235817 |
| C  | 0.117468  | 0.430338  | -0.064257 |
| Au | -1.619681 | -0.888447 | 0.001785  |
| C  | 1.325362  | -0.261178 | -0.130539 |
| C  | 2.332283  | -0.951916 | -0.184921 |
| C  | 3.547717  | -1.692972 | -0.226040 |
| C  | 4.042467  | -2.306128 | 0.938616  |
| C  | 5.258746  | -2.980361 | 0.911504  |
| C  | 5.992440  | -3.061075 | -0.273047 |
| C  | 5.500573  | -2.467021 | -1.436749 |
| C  | 4.287679  | -1.787074 | -1.417914 |
| H  | 6.950858  | -3.592011 | -0.290367 |
| H  | 5.639630  | -3.448695 | 1.826181  |
| H  | 3.467074  | -2.231881 | 1.868688  |
| H  | 3.904021  | -1.307170 | -2.325896 |
| H  | 6.071836  | -2.531824 | -2.369771 |
| H  | -1.610552 | 2.747016  | 2.125685  |
| H  | -3.729248 | 4.057820  | 2.070525  |
| H  | -4.878688 | 4.478150  | -0.100330 |
| H  | -3.915805 | 3.580599  | -2.216933 |
| H  | -1.797397 | 2.263549  | -2.161093 |
| H  | 0.503716  | 3.719971  | 1.014907  |
| C  | 2.992768  | 2.150769  | 1.893572  |
| C  | 4.384926  | 1.753614  | -0.558346 |
| H  | 2.612545  | 2.862735  | -2.537230 |
| H  | 0.488482  | 3.881629  | -1.706830 |
| P  | -3.422514 | -2.388774 | 0.074343  |
| C  | -3.718137 | -3.261793 | -1.495952 |
| C  | -3.234212 | -3.705732 | 1.317458  |
| C  | -5.007458 | -1.586391 | 0.476650  |
| H  | -2.823690 | -3.849164 | -1.768281 |
| H  | -3.916266 | -2.529233 | -2.297994 |
| H  | -3.130121 | -3.257428 | 2.321031  |
| H  | -2.327574 | -4.297132 | 1.100171  |
| H  | -4.585870 | -3.940715 | -1.397641 |
| H  | -4.117515 | -4.371279 | 1.303454  |
| H  | -5.821101 | -2.335519 | 0.499092  |
| H  | -4.934253 | -1.096246 | 1.463542  |
| H  | -5.238402 | -0.817251 | -0.281280 |
| C  | 4.917363  | 1.325415  | 0.652535  |
| C  | 4.234997  | 1.528591  | 1.865227  |
| H  | 4.914247  | 1.592627  | -1.503794 |
| H  | 5.886222  | 0.810930  | 0.659156  |
| H  | 4.690325  | 1.182536  | 2.800138  |
| H  | 2.459413  | 2.296812  | 2.839803  |

## Cartesian coordinates of substituted dyines

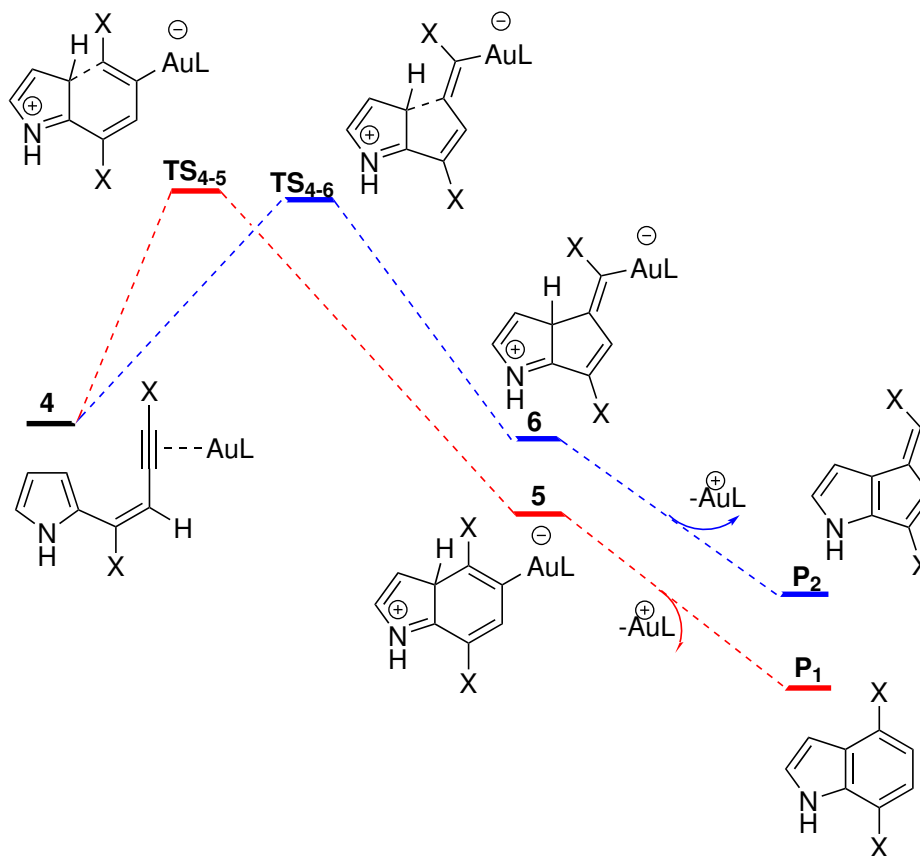

Figure S7: Reaction mechanism.

**Ester**



4e  
 SCF Energy: -1876.19590840  
 ZPE-corrected Energy: -1875.70960  
 $\Delta U$ : -1875.67305  
 $\Delta H$ : -1875.67211  
 $\Delta G$ : -1875.78514

Num. Imaginary Frequencies: 0

|    |            |           |           |
|----|------------|-----------|-----------|
| C  | -0.504670  | -4.035131 | 1.836031  |
| C  | -1.675187  | -3.777125 | 2.533957  |
| N  | -2.348526  | -2.791520 | 1.891129  |
| C  | -1.630822  | -2.368724 | 0.787437  |
| C  | -0.473666  | -3.150540 | 0.740588  |
| C  | -2.099714  | -1.321331 | -0.086473 |
| C  | -3.556038  | -1.087349 | -0.199423 |
| C  | -4.062964  | 0.221145  | -0.246126 |
| C  | -5.426693  | 0.446098  | -0.372525 |
| C  | -6.314359  | -0.631025 | -0.460428 |
| C  | -5.819697  | -1.938779 | -0.416347 |
| C  | -4.454838  | -2.163621 | -0.280990 |
| H  | 0.235456   | -4.796517 | 2.087077  |
| H  | -2.074602  | -4.230714 | 3.441966  |
| H  | -3.222817  | -2.379115 | 2.208038  |
| H  | 0.279594   | -3.114971 | -0.049156 |
| H  | -3.376492  | 1.071100  | -0.155092 |
| H  | -5.827610  | 1.464768  | -0.398314 |
| C  | -7.765323  | -0.330553 | -0.595419 |
| H  | -6.510511  | -2.783624 | -0.494156 |
| H  | -4.074085  | -3.191417 | -0.264119 |
| C  | -1.254657  | -0.532409 | -0.830038 |
| C  | 0.146214   | -0.524677 | -0.722507 |
| C  | 1.386466   | -0.511671 | -0.634979 |
| C  | 2.774159   | -0.885959 | -0.647820 |
| C  | 3.655532   | -0.340936 | -1.598048 |
| C  | 4.986096   | -0.730133 | -1.608795 |
| C  | 5.461487   | -1.657357 | -0.673818 |
| C  | 4.587436   | -2.193949 | 0.278239  |
| C  | 3.253009   | -1.809781 | 0.296780  |
| H  | 3.280295   | 0.383823  | -2.329461 |
| H  | 5.683304   | -0.319568 | -2.346503 |
| C  | 6.899822   | -2.031385 | -0.734304 |
| H  | 4.960278   | -2.915517 | 1.011152  |
| H  | 2.568150   | -2.219097 | 1.047901  |
| Au | 0.993852   | 1.650875  | -0.011210 |
| H  | -1.690972  | 0.154337  | -1.568092 |
| P  | 1.067966   | 3.883361  | 0.663416  |
| C  | 2.064800   | 4.926161  | -0.443268 |
| C  | -0.573082  | 4.665356  | 0.724616  |
| C  | 1.776972   | 4.115116  | 2.321359  |
| H  | 1.643234   | 4.896083  | -1.463128 |
| H  | 3.102098   | 4.549731  | -0.477707 |
| H  | -1.221677  | 4.116343  | 1.429483  |
| H  | -1.036222  | 4.640803  | -0.277333 |
| H  | -0.476490  | 5.715393  | 1.058384  |
| H  | 2.065612   | 5.969672  | -0.077203 |
| H  | 1.793164   | 5.191950  | 2.573880  |
| H  | 1.168760   | 3.573019  | 3.066301  |
| H  | 2.806500   | 3.717500  | 2.347578  |
| O  | 7.234159   | -2.921019 | 0.200219  |
| O  | 7.682380   | -1.582574 | -1.537552 |
| C  | 8.589427   | -3.340240 | 0.220730  |
| H  | 8.677629   | -4.065716 | 1.042072  |
| H  | 8.864502   | -3.814609 | -0.737128 |
| H  | 9.259797   | -2.481459 | 0.398167  |
| O  | -8.508596  | -1.433972 | -0.673853 |
| O  | -8.224540  | 0.786087  | -0.630738 |
| C  | -9.908681  | -1.247525 | -0.807763 |
| H  | -10.352075 | -2.252144 | -0.860729 |
| H  | -10.312875 | -0.698502 | 0.060298  |
| H  | -10.139428 | -0.680709 | -1.726306 |

5e  
 SCF Energy: -1876.21272032  
 ZPE-corrected Energy: -1875.72489  
 $\Delta U$ : -1875.68966  
 $\Delta H$ : -1875.68871  
 $\Delta G$ : -1875.79727

Num. Imaginary Frequencies: 0

|    |            |           |           |
|----|------------|-----------|-----------|
| C  | -0.350474  | -3.899324 | 0.016751  |
| C  | -1.579170  | -4.371277 | 0.302695  |
| N  | -2.519104  | -3.335774 | 0.227234  |
| C  | -1.932509  | -2.182254 | -0.097656 |
| C  | -0.508143  | -2.462959 | -0.362002 |
| C  | -2.452447  | -0.875079 | -0.147330 |
| C  | -3.898114  | -0.601893 | -0.033902 |
| C  | -4.367489  | 0.418659  | 0.806720  |
| C  | -5.726787  | 0.684605  | 0.901020  |
| C  | -6.647802  | -0.064403 | 0.161399  |
| C  | -6.189349  | -1.083027 | -0.680218 |
| C  | -4.827807  | -1.346919 | -0.776572 |
| H  | 0.567246   | -4.483521 | -0.055977 |
| H  | -1.908109  | -5.381034 | 0.550089  |
| H  | -3.512701  | -3.441597 | 0.433737  |
| H  | -0.522560  | -2.528848 | -1.492114 |
| H  | -3.656551  | 0.995437  | 1.409770  |
| H  | -6.098270  | 1.475807  | 1.560705  |
| C  | -8.091359  | 0.261934  | 0.306130  |
| H  | -6.904703  | -1.663787 | -1.270083 |
| H  | -4.479883  | -2.125286 | -1.467525 |
| C  | -1.497219  | 0.132533  | -0.207651 |
| C  | -0.070130  | -0.032634 | -0.203854 |
| C  | 0.438738   | -1.312409 | -0.221374 |
| C  | 1.884069   | -1.605935 | -0.234701 |
| C  | 2.742329   | -0.992295 | -1.161989 |
| C  | 4.109482   | -1.231345 | -1.121651 |
| C  | 4.649879   | -2.082077 | -0.150752 |
| C  | 3.802121   | -2.703661 | 0.772123  |
| C  | 2.431422   | -2.476245 | 0.720124  |
| H  | 2.321285   | -0.335202 | -1.931872 |
| H  | 4.782550   | -0.762682 | -1.847615 |
| C  | 6.122367   | -2.291099 | -0.147552 |
| H  | 4.221797   | -3.364799 | 1.536159  |
| H  | 1.776446   | -2.952713 | 1.459864  |
| Au | 1.171408   | 1.654921  | -0.062604 |
| H  | -1.886093  | 1.160682  | -0.225099 |
| P  | 2.646247   | 3.514949  | 0.100158  |
| C  | 3.570468   | 3.841207  | -1.439996 |
| C  | 1.885190   | 5.119467  | 0.519255  |
| C  | 3.954983   | 3.298103  | 1.354206  |
| H  | 2.865249   | 4.072672  | -2.257867 |
| H  | 4.146327   | 2.940339  | -1.719716 |
| H  | 1.371879   | 5.043747  | 1.494252  |
| H  | 1.138915   | 5.390119  | -0.248429 |
| H  | 2.656012   | 5.911016  | 0.573599  |
| H  | 4.265664   | 4.691226  | -1.305468 |
| H  | 4.636569   | 4.169562  | 1.359175  |
| H  | 3.499750   | 3.184973  | 2.353974  |
| H  | 4.533336   | 2.384014  | 1.128711  |
| O  | 6.516371   | -3.129609 | 0.811326  |
| O  | 6.883412   | -1.762768 | -0.922884 |
| C  | 7.908666   | -3.388491 | 0.894591  |
| H  | 8.044458   | -4.092007 | 1.728530  |
| H  | 8.278475   | -3.835741 | -0.044327 |
| H  | 8.467204   | -2.456436 | 1.088857  |
| O  | -8.868317  | -0.522897 | -0.441162 |
| O  | -8.519857  | 1.137868  | 1.018972  |
| C  | -10.265128 | -0.285198 | -0.369886 |
| H  | -10.739258 | -1.016796 | -1.039796 |
| H  | -10.631088 | -0.421669 | 0.662488  |
| H  | -10.502736 | 0.741296  | -0.698872 |

6e  
SCF Energy: -1876.20103320  
ZPE-corrected Energy: -1875.71334  
 $\Delta U$ : -1875.67787  
 $\Delta H$ : -1875.67692  
 $\Delta G$ : -1875.78672

Num. Imaginary Frequencies: 0

|    |            |           |           |
|----|------------|-----------|-----------|
| C  | 0.639642   | -3.459143 | 0.596070  |
| C  | -0.024647  | -2.397793 | -0.220833 |
| C  | -0.331912  | -4.270773 | 1.055259  |
| N  | -1.606221  | -3.754296 | 0.710363  |
| C  | -1.457165  | -2.614837 | 0.052656  |
| C  | 0.069338   | -0.872746 | -0.238917 |
| C  | -1.291763  | -0.423039 | -0.306116 |
| C  | -2.228969  | -1.441399 | -0.175619 |
| C  | 1.193117   | -0.101528 | -0.216951 |
| C  | 2.498570   | -0.774693 | -0.247171 |
| C  | 2.874912   | -1.580775 | -1.336393 |
| C  | 4.092811   | -2.247718 | -1.334308 |
| C  | 4.958177   | -2.140356 | -0.239977 |
| C  | 4.596754   | -1.330148 | 0.843981  |
| C  | 3.391419   | -0.640381 | 0.830077  |
| Au | 1.166480   | 1.983122  | -0.067593 |
| P  | 1.186715   | 4.362176  | 0.076967  |
| C  | 2.302797   | 5.026277  | 1.358560  |
| C  | -0.431002  | 5.114289  | 0.460012  |
| C  | 1.718647   | 5.198230  | -1.454982 |
| H  | -2.485283  | -4.118017 | 1.079395  |
| H  | 1.714604   | -3.639262 | 0.664312  |
| H  | 0.125637   | -2.710306 | -1.286563 |
| H  | -0.271698  | -5.211759 | 1.603821  |
| H  | -1.545437  | 0.633789  | -0.458319 |
| C  | -3.686643  | -1.335540 | -0.142982 |
| H  | 2.205369   | -1.668155 | -2.201104 |
| H  | 4.391664   | -2.871092 | -2.184009 |
| C  | 6.238897   | -2.889607 | -0.284231 |
| H  | 5.273628   | -1.236312 | 1.698706  |
| H  | 3.116704   | 0.004064  | 1.674379  |
| H  | 1.997655   | 4.648738  | 2.350537  |
| H  | 3.336758   | 4.692915  | 1.160143  |
| H  | 2.270345   | 6.132096  | 1.362809  |
| H  | -0.341308  | 6.215671  | 0.510466  |
| H  | -1.162932  | 4.844579  | -0.321847 |
| H  | -0.797912  | 4.734231  | 1.429928  |
| H  | 1.703481   | 6.295963  | -1.319237 |
| H  | 2.742323   | 4.877054  | -1.717216 |
| H  | 1.042903   | 4.924036  | -2.284235 |
| C  | -4.316579  | -0.130125 | 0.205147  |
| C  | -4.483894  | -2.445258 | -0.466148 |
| C  | -5.868911  | -2.354682 | -0.432928 |
| C  | -6.488618  | -1.151846 | -0.081525 |
| C  | -5.701195  | -0.037829 | 0.234527  |
| H  | -3.712495  | 0.742875  | 0.476919  |
| H  | -4.013182  | -3.386137 | -0.777687 |
| H  | -6.493243  | -3.217252 | -0.688091 |
| C  | -7.974423  | -1.111591 | -0.058420 |
| H  | -6.182528  | 0.904186  | 0.513691  |
| O  | 6.977243   | -2.704288 | 0.812506  |
| O  | 6.584974   | -3.593401 | -1.204032 |
| C  | 8.222004   | -3.381407 | 0.860433  |
| H  | 8.684500   | -3.114408 | 1.821639  |
| H  | 8.075009   | -4.473840 | 0.800416  |
| H  | 8.871360   | -3.064308 | 0.025952  |
| O  | -8.445978  | 0.086411  | 0.288993  |
| O  | -8.682317  | -2.054281 | -0.322436 |
| C  | -9.857115  | 0.221870  | 0.341450  |
| H  | -10.058440 | 1.260516  | 0.640676  |
| H  | -10.305093 | 0.017300  | -0.646369 |
| H  | -10.288340 | -0.476600 | 1.079410  |

TS\_4e\_5e  
SCF Energy: -1876.16816125  
ZPE-corrected Energy: -1875.68250  
 $\Delta U$ : -1875.64681  
 $\Delta H$ : -1875.64587  
 $\Delta G$ : -1875.75623

Num. Imaginary Frequencies: 1  
Imaginary Frequency: -481.8092

|    |           |           |           |
|----|-----------|-----------|-----------|
| C  | 0.097193  | -3.937174 | 0.210411  |
| C  | 1.088134  | -4.150512 | 1.129692  |
| N  | 1.997830  | -3.118257 | 1.040798  |
| C  | 1.612793  | -2.234251 | 0.088145  |
| C  | 0.394925  | -2.700555 | -0.451852 |
| C  | 2.268701  | -0.967455 | -0.166636 |
| C  | 3.741449  | -0.893837 | -0.150767 |
| C  | 4.506368  | -1.969307 | -0.634751 |
| C  | 5.892769  | -1.901183 | -0.652056 |
| C  | 6.550243  | -0.761005 | -0.180181 |
| C  | 5.798493  | 0.311623  | 0.312918  |
| C  | 4.411617  | 0.243325  | 0.329613  |
| H  | -0.748943 | -4.596009 | 0.008906  |
| H  | 1.234205  | -4.955427 | 1.850573  |
| H  | 2.795888  | -2.988739 | 1.660878  |
| H  | 0.048373  | -2.441464 | -1.459185 |
| H  | 4.004335  | -2.863498 | -1.022928 |
| H  | 6.489418  | -2.733993 | -1.038846 |
| C  | 8.036448  | -0.743866 | -0.218044 |
| H  | 6.308670  | 1.200102  | 0.696894  |
| H  | 3.838280  | 1.077229  | 0.749647  |
| C  | 1.486875  | 0.143295  | -0.321336 |
| C  | 0.049538  | 0.114343  | -0.189364 |
| C  | -0.753356 | -0.897954 | -0.059035 |
| Au | -1.061830 | 1.936953  | -0.005888 |
| H  | 1.975130  | 1.109502  | -0.493172 |
| C  | -2.107378 | -1.387717 | -0.136782 |
| C  | -2.915219 | -1.044376 | -1.236552 |
| C  | -4.228315 | -1.488055 | -1.298401 |
| C  | -4.752213 | -2.281021 | -0.271658 |
| C  | -3.951754 | -2.629842 | 0.823159  |
| C  | -2.637193 | -2.189804 | 0.887834  |
| H  | -2.496650 | -0.421840 | -2.035693 |
| H  | -4.870556 | -1.228146 | -2.146157 |
| C  | -6.169232 | -2.726952 | -0.393704 |
| H  | -4.367620 | -3.247258 | 1.624528  |
| H  | -2.000936 | -2.461209 | 1.737705  |
| P  | -2.189172 | 4.001758  | 0.179331  |
| C  | -3.994518 | 3.879654  | -0.035852 |
| C  | -1.968193 | 4.822091  | 1.791092  |
| C  | -1.656251 | 5.239870  | -1.046555 |
| H  | -4.459958 | 4.877833  | 0.067712  |
| H  | -4.223716 | 3.471650  | -1.036054 |
| H  | -4.415216 | 3.199734  | 0.725839  |
| H  | -2.221946 | 6.180684  | -0.910782 |
| H  | -0.577381 | 5.442591  | -0.926472 |
| H  | -1.829823 | 4.853669  | -2.066311 |
| H  | -2.516412 | 5.782703  | 1.808537  |
| H  | -2.348532 | 4.169984  | 2.596789  |
| H  | -0.894968 | 5.010893  | 1.969145  |
| O  | -6.553764 | -3.481247 | 0.633621  |
| O  | -6.889039 | -2.437337 | -1.318474 |
| C  | -7.891830 | -3.954930 | 0.607686  |
| H  | -8.025716 | -4.555969 | 1.518327  |
| H  | -8.602218 | -3.110283 | 0.600578  |
| H  | -8.066365 | -4.575460 | -0.288087 |
| O  | 8.544812  | 0.394063  | 0.256664  |
| O  | 8.714706  | -1.654002 | -0.631237 |
| C  | 9.959072  | 0.503627  | 0.259498  |
| H  | 10.193248 | 1.491611  | 0.681348  |
| H  | 10.410087 | -0.290991 | 0.878821  |
| H  | 10.357918 | 0.424199  | -0.766663 |

TS\_4e\_6e  
SCF Energy: -1876.17104680  
ZPE-corrected Energy: -1875.68589  
 $\Delta U$ : -1875.65005  
 $\Delta H$ : -1875.64911  
 $\Delta G$ : -1875.76030

Num. Imaginary Frequencies: 1  
Imaginary Frequency: -470.2797

|    |            |           |           |
|----|------------|-----------|-----------|
| C  | 0.570646   | -3.486285 | 0.743219  |
| C  | -0.094414  | -2.657965 | -0.215642 |
| C  | -0.342650  | -3.765843 | 1.727355  |
| N  | -1.540676  | -3.150963 | 1.427555  |
| C  | -1.411459  | -2.453803 | 0.272986  |
| C  | 0.008994   | -0.574319 | -0.533034 |
| C  | -1.373503  | -0.416015 | -0.773033 |
| C  | -2.207250  | -1.380655 | -0.249627 |
| C  | 1.210518   | -0.088810 | -0.417454 |
| C  | 2.489065   | -0.799485 | -0.422788 |
| C  | 2.854590   | -1.611639 | -1.509313 |
| C  | 4.046174   | -2.324483 | -1.481554 |
| C  | 4.892581   | -2.248159 | -0.370220 |
| C  | 4.537195   | -1.433337 | 0.711467  |
| C  | 3.354432   | -0.705690 | 0.678586  |
| Au | 1.187322   | 2.018526  | -0.086456 |
| P  | 1.250661   | 4.354245  | 0.257093  |
| C  | -0.360613  | 5.097429  | 0.672530  |
| C  | 1.831200   | 5.288869  | -1.195381 |
| C  | 2.356734   | 4.866198  | 1.611641  |
| H  | -2.328854  | -3.077702 | 2.069401  |
| H  | 1.581752   | -3.891001 | 0.668076  |
| H  | 0.154219   | -2.656484 | -1.285026 |
| H  | -0.250665  | -4.376333 | 2.626743  |
| H  | -1.726941  | 0.419260  | -1.393135 |
| C  | -3.667084  | -1.321453 | -0.199348 |
| H  | 2.200463   | -1.668552 | -2.387658 |
| H  | 4.339932   | -2.956741 | -2.326313 |
| C  | 6.150965   | -3.037136 | -0.394154 |
| H  | 5.198914   | -1.367189 | 1.580336  |
| H  | 3.079914   | -0.062105 | 1.523083  |
| H  | -1.081750  | 4.904513  | -0.141051 |
| H  | -0.749771  | 4.647054  | 1.602621  |
| H  | -0.251949  | 6.189336  | 0.812830  |
| H  | 1.845233   | 6.372295  | -0.973270 |
| H  | 2.849143   | 4.958181  | -1.467539 |
| H  | 1.159796   | 5.100611  | -2.051591 |
| H  | 2.344059   | 5.966831  | 1.721302  |
| H  | 2.026619   | 4.401661  | 2.557420  |
| H  | 3.387218   | 4.532669  | 1.396998  |
| C  | -4.334663  | -0.086388 | -0.246276 |
| C  | -4.426359  | -2.499476 | -0.102622 |
| C  | -5.812632  | -2.441301 | -0.052476 |
| C  | -6.468790  | -1.207860 | -0.101535 |
| C  | -5.720227  | -0.028599 | -0.200859 |
| H  | -3.756842  | 0.843464  | -0.294978 |
| H  | -3.925095  | -3.474798 | -0.090185 |
| H  | -6.410020  | -3.356085 | 0.018091  |
| C  | -7.955880  | -1.205124 | -0.040932 |
| H  | -6.232020  | 0.937658  | -0.232104 |
| O  | 6.874853   | -2.876425 | 0.715395  |
| O  | 6.490899   | -3.748028 | -1.310365 |
| C  | 8.098381   | -3.590066 | 0.783014  |
| H  | 8.550462   | -3.340755 | 1.753829  |
| H  | 7.920416   | -4.677342 | 0.714871  |
| H  | 8.771814   | -3.288169 | -0.037905 |
| O  | -8.464489  | 0.025024  | -0.100531 |
| O  | -8.630557  | -2.202364 | 0.052373  |
| C  | -9.878786  | 0.129937  | -0.049289 |
| H  | -10.113012 | 1.202146  | -0.113737 |
| H  | -10.339596 | -0.411941 | -0.893181 |
| H  | -10.265657 | -0.287914 | 0.896244  |

# Cyclohexane

4c  
SCF Energy: -1428.22435949  
ZPE-corrected Energy: -1427.68577  
 $\Delta U$ : -1427.65604  
 $\Delta H$ : -1427.65510  
 $\Delta G$ : -1427.74873

Num. Imaginary Frequencies: 0

|    |           |           |           |
|----|-----------|-----------|-----------|
| C  | 0.515693  | -0.847216 | 3.229731  |
| C  | 1.821626  | -1.292773 | 3.121230  |
| N  | 2.441445  | -0.564193 | 2.155541  |
| C  | 1.560062  | 0.345978  | 1.598160  |
| C  | 0.347876  | 0.179740  | 2.276068  |
| C  | 1.949690  | 1.243597  | 0.530063  |
| H  | -0.228911 | -1.210222 | 3.940186  |
| H  | 2.357596  | -2.068627 | 3.669775  |
| H  | 3.403759  | -0.706974 | 1.862207  |
| H  | -0.545287 | 0.790758  | 2.137215  |
| C  | 1.054529  | 1.818070  | -0.330777 |
| C  | -0.336410 | 1.577328  | -0.384111 |
| C  | -1.558970 | 1.396051  | -0.506382 |
| Au | -0.840330 | -0.787026 | -0.552844 |
| H  | 1.436383  | 2.486126  | -1.114649 |
| P  | -0.358531 | -3.071482 | -0.507327 |
| C  | -0.793781 | -4.032176 | -1.988115 |
| C  | 1.430985  | -3.311942 | -0.269262 |
| C  | -1.142844 | -3.936729 | 0.886986  |
| H  | -0.282337 | -3.610018 | -2.870721 |
| H  | -1.884038 | -3.985672 | -2.155019 |
| H  | 1.747664  | -2.792765 | 0.654850  |
| H  | 1.980541  | -2.877840 | -1.123347 |
| H  | 1.668676  | -4.389416 | -0.188651 |
| H  | -0.488304 | -5.087159 | -1.856955 |
| H  | -0.811380 | -4.991642 | 0.913653  |
| H  | -0.860008 | -3.437104 | 1.831192  |
| H  | -2.241174 | -3.901592 | 0.780956  |
| C  | -3.013780 | 1.618939  | -0.470206 |
| C  | 3.428681  | 1.458308  | 0.299737  |
| C  | -3.330760 | 3.095012  | -0.746044 |
| H  | -3.490795 | 1.008999  | -1.267486 |
| C  | -4.831865 | 3.343885  | -0.696524 |
| H  | -2.819573 | 3.709540  | 0.025063  |
| H  | -2.909749 | 3.393745  | -1.724472 |
| C  | -5.423326 | 2.902878  | 0.636001  |
| H  | -5.040759 | 4.414074  | -0.882970 |
| H  | -5.320861 | 2.780950  | -1.519578 |
| C  | -5.107244 | 1.439506  | 0.917644  |
| H  | -4.998500 | 3.529737  | 1.448607  |
| H  | -6.516685 | 3.071298  | 0.648967  |
| C  | -3.607649 | 1.180057  | 0.875511  |
| H  | -5.514290 | 1.132587  | 1.899330  |
| H  | -5.607086 | 0.802778  | 0.157228  |
| H  | -3.103625 | 1.753909  | 1.682224  |
| H  | -3.383543 | 0.109756  | 1.057066  |
| C  | 3.822804  | 2.883155  | -0.094761 |
| H  | 3.957110  | 1.252455  | 1.254600  |
| C  | 5.335881  | 3.003204  | -0.226768 |
| H  | 3.364491  | 3.147622  | -1.070148 |
| H  | 3.429750  | 3.603421  | 0.648405  |
| C  | 5.877988  | 2.012857  | -1.249779 |
| H  | 5.610182  | 4.038286  | -0.504704 |
| H  | 5.806303  | 2.809167  | 0.760376  |
| C  | 5.470449  | 0.585969  | -0.905846 |
| H  | 5.477013  | 2.272490  | -2.252698 |
| H  | 6.979098  | 2.093134  | -1.322691 |
| C  | 3.960565  | 0.465804  | -0.749700 |
| H  | 5.828914  | -0.120225 | -1.678603 |
| H  | 5.958077  | 0.283613  | 0.045344  |
| H  | 3.460291  | 0.688110  | -1.716572 |
| H  | 3.673788  | -0.573642 | -0.489354 |

5c  
SCF Energy: -1428.23606384  
ZPE-corrected Energy: -1427.69631  
 $\Delta U$ : -1427.66766  
 $\Delta H$ : -1427.66671  
 $\Delta G$ : -1427.75825

Num. Imaginary Frequencies: 0

|    |           |           |           |
|----|-----------|-----------|-----------|
| C  | 1.895403  | 3.725167  | 0.144068  |
| C  | 3.225178  | 3.722626  | 0.356461  |
| N  | 3.739939  | 2.437258  | 0.159200  |
| C  | 2.765093  | 1.578651  | -0.164136 |
| C  | 1.515349  | 2.353072  | -0.322537 |
| C  | 2.810525  | 0.183890  | -0.292647 |
| H  | 1.248459  | 4.601719  | 0.181300  |
| H  | 3.895982  | 4.537619  | 0.630206  |
| H  | 4.720608  | 2.189617  | 0.281083  |
| H  | 1.498139  | 2.481115  | -1.447742 |
| C  | 1.564999  | -0.426578 | -0.292405 |
| C  | 0.282933  | 0.219456  | -0.211309 |
| C  | 0.231256  | 1.594674  | -0.183190 |
| Au | -1.423437 | -0.995483 | -0.067553 |
| H  | 1.564227  | -1.525910 | -0.316739 |
| P  | -3.328945 | -2.418618 | 0.123523  |
| C  | -4.694439 | -2.033027 | -1.025859 |
| C  | -2.989738 | -4.187249 | -0.177067 |
| C  | -4.123482 | -2.397357 | 1.767363  |
| H  | -4.339045 | -2.116162 | -2.068293 |
| H  | -5.041580 | -0.998205 | -0.857064 |
| H  | -2.236888 | -4.549784 | 0.545235  |
| H  | -2.587716 | -4.321079 | -1.197037 |
| H  | -3.915551 | -4.783101 | -0.069139 |
| H  | -5.539194 | -2.730718 | -0.871338 |
| H  | -4.994112 | -3.079540 | 1.785880  |
| H  | -3.396651 | -2.713474 | 2.536497  |
| H  | -4.458784 | -1.372098 | 2.004778  |
| C  | -1.053284 | 2.368764  | -0.144315 |
| C  | 4.116367  | -0.567217 | -0.238645 |
| C  | 4.166687  | -1.784067 | -1.164119 |
| H  | 4.918333  | 0.122388  | -0.585354 |
| C  | 5.531504  | -2.457547 | -1.102477 |
| H  | 3.394766  | -2.518787 | -0.852220 |
| H  | 3.918019  | -1.482558 | -2.200329 |
| C  | 5.878268  | -2.866395 | 0.323696  |
| H  | 5.552279  | -3.335445 | -1.775437 |
| H  | 6.303218  | -1.754228 | -1.481498 |
| C  | 5.816182  | -1.672718 | 1.268084  |
| H  | 5.155456  | -3.637731 | 0.665405  |
| H  | 6.878928  | -3.337227 | 0.360193  |
| C  | 4.460512  | -0.983681 | 1.198532  |
| H  | 6.031708  | -1.984477 | 2.307652  |
| H  | 6.607396  | -0.944175 | 0.989618  |
| H  | 3.666148  | -1.673578 | 1.557262  |
| H  | 4.431803  | -0.101952 | 1.869507  |
| C  | -1.195561 | 3.407930  | -1.263332 |
| H  | -1.867173 | 1.627409  | -0.295034 |
| C  | -2.546687 | 4.106036  | -1.187471 |
| H  | -0.398847 | 4.176197  | -1.188487 |
| H  | -1.063302 | 2.912208  | -2.245807 |
| C  | -2.753953 | 4.748581  | 0.177958  |
| H  | -2.628879 | 4.860656  | -1.992491 |
| H  | -3.352478 | 3.363734  | -1.369109 |
| C  | -2.631481 | 3.715804  | 1.290240  |
| H  | -1.987792 | 5.539740  | 0.328142  |
| H  | -3.737763 | 5.252945  | 0.224068  |
| C  | -1.288653 | 2.997991  | 1.237683  |
| H  | -2.769612 | 4.188086  | 2.281376  |
| H  | -3.445618 | 2.967759  | 1.182946  |
| H  | -0.475852 | 3.716142  | 1.475195  |
| H  | -1.240343 | 2.203641  | 2.008788  |



6c  
SCF Energy: -1428.22306481  
ZPE-corrected Energy: -1427.68371  
 $\Delta U$ : -1427.65488  
 $\Delta H$ : -1427.65394  
 $\Delta G$ : -1427.74635

Num. Imaginary Frequencies: 0

|    |           |           |           |
|----|-----------|-----------|-----------|
| C  | -1.662978 | 3.715783  | -0.496208 |
| C  | -1.663506 | 2.383580  | 0.190005  |
| C  | -2.918248 | 3.941400  | -0.930927 |
| N  | -3.728006 | 2.802198  | -0.708368 |
| C  | -2.991056 | 1.843138  | -0.158844 |
| C  | -0.784518 | 1.132584  | 0.129008  |
| C  | -1.719189 | 0.042577  | 0.056751  |
| C  | -3.043740 | 0.432624  | -0.084771 |
| C  | 0.572871  | 1.045249  | 0.232083  |
| C  | 1.363632  | 2.309439  | 0.392438  |
| Au | 1.571826  | -0.780926 | 0.026690  |
| P  | 2.721527  | -2.866360 | -0.190949 |
| C  | 2.649505  | -3.914497 | 1.302336  |
| C  | 4.506738  | -2.721131 | -0.543108 |
| C  | 2.100685  | -3.952815 | -1.520612 |
| H  | -4.666110 | 2.681734  | -1.089224 |
| H  | -0.852718 | 4.448028  | -0.489158 |
| H  | -1.713409 | 2.622131  | 1.284100  |
| H  | -3.360288 | 4.829750  | -1.384569 |
| H  | -1.387514 | -1.002270 | 0.110350  |
| C  | -4.275756 | -0.401070 | -0.239159 |
| H  | 1.596705  | -4.143414 | 1.545777  |
| H  | 3.200228  | -4.859990 | 1.139597  |
| H  | 3.095481  | -3.375459 | 2.156938  |
| H  | 4.968157  | -3.723522 | -0.622706 |
| H  | 4.655450  | -2.175792 | -1.491959 |
| H  | 5.001966  | -2.155598 | 0.265954  |
| H  | 2.678798  | -4.895689 | -1.549336 |
| H  | 1.035024  | -4.184787 | -1.346692 |
| H  | 2.192254  | -3.439858 | -2.494410 |
| C  | 1.855064  | 2.792213  | -0.983026 |
| H  | 0.709436  | 3.114321  | 0.801469  |
| C  | 2.618344  | 4.104949  | -0.865724 |
| H  | 2.513354  | 2.007701  | -1.415270 |
| H  | 0.997162  | 2.896565  | -1.677542 |
| C  | 3.781482  | 3.985637  | 0.110703  |
| H  | 2.976642  | 4.425406  | -1.862758 |
| H  | 1.923508  | 4.898037  | -0.513487 |
| C  | 3.307971  | 3.494742  | 1.473061  |
| H  | 4.522110  | 3.264398  | -0.296281 |
| H  | 4.307859  | 4.954443  | 0.206502  |
| C  | 2.551547  | 2.179160  | 1.348371  |
| H  | 4.164538  | 3.378719  | 2.164140  |
| H  | 2.642127  | 4.259339  | 1.927465  |
| H  | 3.235511  | 1.392795  | 0.959556  |
| H  | 2.201941  | 1.827004  | 2.339055  |
| C  | -5.251619 | -0.158595 | 0.921462  |
| H  | -4.789240 | -0.070174 | -1.172839 |
| C  | -6.526667 | -0.973847 | 0.758732  |
| H  | -4.742133 | -0.441192 | 1.867800  |
| H  | -5.486814 | 0.921854  | 1.004341  |
| C  | -6.216288 | -2.457601 | 0.610625  |
| H  | -7.201748 | -0.798354 | 1.617573  |
| H  | -7.069588 | -0.622254 | -0.144341 |
| C  | -5.254089 | -2.700996 | -0.544858 |
| H  | -5.756540 | -2.828965 | 1.551314  |
| H  | -7.148578 | -3.036140 | 0.467798  |
| C  | -3.975849 | -1.890684 | -0.378273 |
| H  | -5.012573 | -3.777072 | -0.632100 |
| H  | -5.745703 | -2.412128 | -1.498034 |
| H  | -3.442928 | -2.233314 | 0.535309  |
| H  | -3.289504 | -2.064086 | -1.230409 |

TS\_4c\_5c  
SCF Energy: -1428.19094761  
ZPE-corrected Energy: -1427.65331  
 $\Delta U$ : -1427.62439  
 $\Delta H$ : -1427.62344  
 $\Delta G$ : -1427.71545

Num. Imaginary Frequencies: 1  
Imaginary Frequency: -460.4007

|    |           |           |           |
|----|-----------|-----------|-----------|
| C  | -2.508627 | 3.447703  | 0.119888  |
| C  | -3.364989 | 3.180979  | 1.152752  |
| N  | -3.530618 | 1.813678  | 1.237303  |
| C  | -2.792448 | 1.190152  | 0.288451  |
| C  | -2.099016 | 2.185179  | -0.429773 |
| C  | -2.687637 | -0.250015 | 0.132126  |
| H  | -2.217616 | 4.440908  | -0.228600 |
| H  | -3.879238 | 3.845306  | 1.847617  |
| H  | -4.059843 | 1.341733  | 1.967630  |
| H  | -1.752272 | 2.040757  | -1.460582 |
| C  | -1.452562 | -0.771849 | -0.084795 |
| C  | -0.249511 | 0.043162  | -0.116432 |
| C  | -0.109019 | 1.330639  | -0.103818 |
| Au | 1.654886  | -0.941978 | -0.041988 |
| H  | -1.337543 | -1.857388 | -0.168654 |
| P  | 3.708059  | -2.093079 | 0.102744  |
| C  | 4.803159  | -1.477878 | 1.423556  |
| C  | 3.537615  | -3.874704 | 0.444173  |
| C  | 4.721754  | -2.008134 | -1.409562 |
| H  | 5.744744  | -2.058412 | 1.437187  |
| H  | 5.034558  | -0.411995 | 1.251574  |
| H  | 4.299948  | -1.575225 | 2.401635  |
| H  | 5.666540  | -2.565875 | -1.268202 |
| H  | 4.164087  | -2.443376 | -2.257393 |
| H  | 4.951964  | -0.954088 | -1.645087 |
| H  | 4.535537  | -4.347695 | 0.509212  |
| H  | 3.001802  | -4.021448 | 1.398490  |
| H  | 2.957480  | -4.356335 | -0.362410 |
| C  | 0.796209  | 2.490692  | -0.172850 |
| C  | -3.946150 | -1.068598 | 0.264384  |
| C  | 0.781350  | 3.357671  | 1.091354  |
| H  | 1.796867  | 2.000871  | -0.212597 |
| C  | 1.851423  | 4.439262  | 1.023978  |
| H  | -0.218338 | 3.824301  | 1.200351  |
| H  | 0.927979  | 2.711946  | 1.978514  |
| C  | 1.713262  | 5.278882  | -0.239092 |
| H  | 1.798110  | 5.076382  | 1.926748  |
| H  | 2.855485  | 3.963929  | 1.036106  |
| C  | 1.771812  | 4.401874  | -1.482875 |
| H  | 0.739628  | 5.814663  | -0.217548 |
| H  | 2.499048  | 6.056714  | -0.275874 |
| C  | 0.687116  | 3.333423  | -1.449997 |
| H  | 1.666586  | 5.012129  | -2.399403 |
| H  | 2.768121  | 3.914886  | -1.542428 |
| H  | -0.302085 | 3.830982  | -1.484751 |
| H  | 0.746799  | 2.673102  | -2.336702 |
| C  | -3.725938 | -2.576372 | 0.318431  |
| H  | -4.432494 | -0.775469 | 1.225025  |
| C  | -5.043487 | -3.322265 | 0.487964  |
| H  | -3.246616 | -2.905729 | -0.628312 |
| H  | -3.026169 | -2.833418 | 1.137249  |
| C  | -6.019700 | -2.977950 | -0.628699 |
| H  | -4.857942 | -4.412379 | 0.522667  |
| H  | -5.493912 | -3.050549 | 1.466307  |
| C  | -6.249049 | -1.474812 | -0.703740 |
| H  | -5.604649 | -3.332190 | -1.596390 |
| H  | -6.978982 | -3.510535 | -0.485290 |
| C  | -4.936298 | -0.719260 | -0.858265 |
| H  | -6.930074 | -1.223032 | -1.538704 |
| H  | -6.754292 | -1.135278 | 0.225521  |
| H  | -4.461465 | -0.981141 | -1.828385 |
| H  | -5.119911 | 0.372966  | -0.882719 |

TS\_4c\_6c  
 SCF Energy: -1428.19517273  
 ZPE-corrected Energy: -1427.65827  
 $\Delta U$ : -1427.62918  
 $\Delta H$ : -1427.62824  
 $\Delta G$ : -1427.72139

Num. Imaginary Frequencies: 1  
 Imaginary Frequency: -469.0055

|    |           |           |           |
|----|-----------|-----------|-----------|
| C  | -1.864411 | 3.640018  | -0.688584 |
| C  | -1.944794 | 2.479353  | 0.154859  |
| C  | -2.794240 | 3.479384  | -1.680647 |
| N  | -3.450622 | 2.276393  | -1.499326 |
| C  | -2.938701 | 1.643930  | -0.417512 |
| C  | -0.741984 | 0.781409  | 0.378040  |
| C  | -1.826384 | -0.128120 | 0.487061  |
| C  | -3.035563 | 0.270415  | -0.020263 |
| C  | 0.537877  | 1.011531  | 0.405707  |
| C  | 1.255291  | 2.318262  | 0.533996  |
| Au | 1.637274  | -0.778609 | 0.043570  |
| P  | 2.920994  | -2.727685 | -0.347619 |
| C  | 2.971598  | -3.883254 | 1.061658  |
| C  | 4.672146  | -2.385969 | -0.721646 |
| C  | 2.348117  | -3.742416 | -1.750062 |
| H  | -4.083172 | 1.857808  | -2.178689 |
| H  | -1.248157 | 4.526635  | -0.526767 |
| H  | -1.759202 | 2.518028  | 1.237420  |
| H  | -3.068392 | 4.134376  | -2.508778 |
| H  | -1.666649 | -1.089077 | 0.993832  |
| C  | -4.280310 | -0.546215 | -0.161529 |
| H  | 1.947796  | -4.217085 | 1.306417  |
| H  | 3.593718  | -4.763750 | 0.813836  |
| H  | 3.394971  | -3.373894 | 1.945314  |
| H  | 5.218512  | -3.331979 | -0.895005 |
| H  | 4.743622  | -1.753043 | -1.623803 |
| H  | 5.135789  | -1.846720 | 0.123056  |
| H  | 3.001489  | -4.626605 | -1.874338 |
| H  | 1.311355  | -4.077105 | -1.570344 |
| H  | 2.367316  | -3.141655 | -2.676407 |
| C  | 1.816226  | 2.765486  | -0.821371 |
| H  | 0.518942  | 3.089803  | 0.856518  |
| C  | 2.509011  | 4.116705  | -0.707342 |
| H  | 2.539806  | 1.998570  | -1.174646 |
| H  | 1.000433  | 2.800070  | -1.570440 |
| C  | 3.605974  | 4.087908  | 0.349527  |
| H  | 2.920452  | 4.416103  | -1.690081 |
| H  | 1.757717  | 4.888927  | -0.434812 |
| C  | 3.058295  | 3.633862  | 1.696861  |
| H  | 4.401940  | 3.383636  | 0.025815  |
| H  | 4.084512  | 5.081651  | 0.439428  |
| C  | 2.369093  | 2.280865  | 1.582801  |
| H  | 3.866619  | 3.586135  | 2.451064  |
| H  | 2.329112  | 4.385234  | 2.068071  |
| H  | 3.110853  | 1.507522  | 1.285264  |
| H  | 1.957239  | 1.961757  | 2.560175  |
| C  | -5.443143 | 0.072179  | 0.629732  |
| H  | -4.566129 | -0.511740 | -1.239951 |
| C  | -6.727272 | -0.724653 | 0.446724  |
| H  | -5.160117 | 0.089568  | 1.704165  |
| H  | -5.593542 | 1.127288  | 0.326939  |
| C  | -6.529727 | -2.187952 | 0.819011  |
| H  | -7.540084 | -0.273656 | 1.046701  |
| H  | -7.046958 | -0.657753 | -0.615025 |
| C  | -5.383537 | -2.801433 | 0.025619  |
| H  | -6.301559 | -2.260471 | 1.903833  |
| H  | -7.463642 | -2.758534 | 0.656390  |
| C  | -4.095516 | -2.012194 | 0.218247  |
| H  | -5.227524 | -3.857250 | 0.316600  |
| H  | -5.647380 | -2.809596 | -1.053298 |
| H  | -3.791612 | -2.068653 | 1.285861  |
| H  | -3.271537 | -2.458545 | -0.372108 |

Methoxy

4d

SCF Energy: -1649.7626656  
ZPE-corrected Energy: -1649.29714

$\Delta U$ : -1649.26461

$\Delta H$ : -1649.26367

$\Delta G$ : -1649.36576

Num. Imaginary Frequencies: 0

|    |           |           |           |
|----|-----------|-----------|-----------|
| C  | -1.052352 | -4.329632 | 1.121008  |
| C  | -2.135822 | -4.047718 | 1.936173  |
| N  | -2.689185 | -2.878676 | 1.520483  |
| C  | -1.974377 | -2.366075 | 0.455950  |
| C  | -0.947673 | -3.272162 | 0.191203  |
| C  | -2.331124 | -1.120424 | -0.193706 |
| C  | -3.749211 | -0.719322 | -0.230837 |
| C  | -4.125660 | 0.633460  | -0.122249 |
| C  | -5.452945 | 1.016980  | -0.189197 |
| C  | -6.462045 | 0.057649  | -0.373729 |
| C  | -6.109219 | -1.293520 | -0.482660 |
| C  | -4.769652 | -1.665635 | -0.406278 |
| H  | -0.416444 | -5.214475 | 1.184047  |
| H  | -2.552657 | -4.597430 | 2.781137  |
| H  | -3.480142 | -2.415377 | 1.960989  |
| H  | -0.234667 | -3.193493 | -0.632654 |
| H  | -3.356492 | 1.396793  | 0.046651  |
| H  | -5.748496 | 2.067151  | -0.090079 |
| O  | -7.720206 | 0.521554  | -0.426891 |
| H  | -6.868386 | -2.066359 | -0.635265 |
| H  | -4.511376 | -2.725999 | -0.513804 |
| C  | -1.389628 | -0.312943 | -0.783061 |
| C  | 0.004685  | -0.503243 | -0.689225 |
| C  | 1.223627  | -0.742272 | -0.613255 |
| C  | 2.517972  | -1.356428 | -0.589054 |
| C  | 3.581640  | -0.881748 | -1.383408 |
| C  | 4.812014  | -1.509596 | -1.354550 |
| C  | 5.024288  | -2.627906 | -0.529187 |
| C  | 3.975650  | -3.104623 | 0.269245  |
| C  | 2.739047  | -2.468345 | 0.238616  |
| H  | 3.425306  | -0.011099 | -2.031648 |
| H  | 5.645892  | -1.154989 | -1.969712 |
| O  | 6.251726  | -3.165316 | -0.567901 |
| H  | 4.111550  | -3.970001 | 0.924390  |
| H  | 1.922540  | -2.837418 | 0.870821  |
| Au | 1.166201  | 1.492182  | -0.072553 |
| H  | -1.728998 | 0.547017  | -1.375671 |
| P  | 1.634842  | 3.697963  | 0.533360  |
| C  | 2.837226  | 4.511851  | -0.561749 |
| C  | 0.162786  | 4.766821  | 0.513225  |
| C  | 2.325994  | 3.852689  | 2.208154  |
| H  | 2.449747  | 4.527071  | -1.595360 |
| H  | 3.790030  | 3.954557  | -0.548324 |
| H  | -0.592591 | 4.375939  | 1.217125  |
| H  | -0.272037 | 4.781431  | -0.501504 |
| H  | 0.440127  | 5.796404  | 0.807351  |
| H  | 3.015389  | 5.549124  | -0.221349 |
| H  | 2.518933  | 4.916928  | 2.439107  |
| H  | 1.614532  | 3.441163  | 2.945161  |
| H  | 3.271599  | 3.286552  | 2.274467  |
| C  | 6.539742  | -4.284702 | 0.233595  |
| H  | 7.590320  | -4.549460 | 0.040167  |
| H  | 6.418484  | -4.053666 | 1.309866  |
| H  | 5.896511  | -5.146916 | -0.029119 |
| C  | -8.779100 | -0.385568 | -0.606490 |
| H  | -9.705984 | 0.207942  | -0.617369 |
| H  | -8.688246 | -0.929582 | -1.566852 |
| H  | -8.829979 | -1.118305 | 0.222440  |

5d

SCF Energy: -1649.77792896

ZPE-corrected Energy: -1649.31065

$\Delta U$ : -1649.27950

$\Delta H$ : -1649.27856

$\Delta G$ : -1649.37633

Num. Imaginary Frequencies: 0

|    |           |           |           |
|----|-----------|-----------|-----------|
| C  | -0.946020 | 3.910204  | -0.123589 |
| C  | -2.222544 | 4.213054  | -0.429783 |
| N  | -3.023441 | 3.070064  | -0.334484 |
| C  | -2.295062 | 2.006704  | 0.023616  |
| C  | -0.918995 | 2.473644  | 0.286244  |
| C  | -2.649789 | 0.650663  | 0.109084  |
| C  | -4.048954 | 0.197672  | -0.002115 |
| C  | -4.393471 | -0.904497 | -0.804550 |
| C  | -5.703688 | -1.343275 | -0.892283 |
| C  | -6.722653 | -0.692434 | -0.179091 |
| C  | -6.398397 | 0.405781  | 0.626051  |
| C  | -5.074474 | 0.835265  | 0.706816  |
| H  | -0.113573 | 4.610878  | -0.057141 |
| H  | -2.674327 | 5.166774  | -0.704808 |
| H  | -4.017406 | 3.038394  | -0.560494 |
| H  | -0.937291 | 2.550524  | 1.414355  |
| H  | -3.616950 | -1.415238 | -1.387089 |
| H  | -5.976526 | -2.196170 | -1.523359 |
| O  | -7.963352 | -1.186511 | -0.329697 |
| H  | -7.163918 | 0.929082  | 1.206610  |
| H  | -4.837486 | 1.676202  | 1.372065  |
| C  | -1.570480 | -0.225361 | 0.198141  |
| C  | -0.179187 | 0.116185  | 0.190840  |
| C  | 0.174743  | 1.451719  | 0.179529  |
| C  | 1.564293  | 1.927137  | 0.220199  |
| C  | 2.498230  | 1.393944  | 1.131310  |
| C  | 3.820047  | 1.803024  | 1.123956  |
| C  | 4.263600  | 2.757970  | 0.193684  |
| C  | 3.350090  | 3.303147  | -0.717556 |
| C  | 2.018334  | 2.895334  | -0.685234 |
| H  | 2.163603  | 0.662440  | 1.876769  |
| H  | 4.544309  | 1.404448  | 1.843073  |
| O  | 5.562832  | 3.088848  | 0.256833  |
| H  | 3.663513  | 4.043133  | -1.459855 |
| H  | 1.323650  | 3.317076  | -1.422169 |
| Au | 1.256160  | -1.409164 | 0.058909  |
| H  | -1.827099 | -1.293881 | 0.237273  |
| P  | 2.952631  | -3.069408 | -0.125133 |
| C  | 3.969947  | -3.241283 | 1.381573  |
| C  | 2.406746  | -4.772417 | -0.488604 |
| C  | 4.174735  | -2.702500 | -1.431070 |
| H  | 3.334467  | -3.557670 | 2.227694  |
| H  | 4.424167  | -2.265346 | 1.631992  |
| H  | 1.859734  | -4.791975 | -1.447724 |
| H  | 1.727423  | -5.123617 | 0.308124  |
| H  | 3.277423  | -5.452024 | -0.551153 |
| H  | 4.771272  | -3.988401 | 1.227151  |
| H  | 4.966903  | -3.474442 | -1.452289 |
| H  | 3.672091  | -2.667263 | -2.413930 |
| H  | 4.632126  | -1.715226 | -1.238279 |
| C  | 6.071350  | 4.049199  | -0.634874 |
| H  | 7.139974  | 4.166239  | -0.398452 |
| H  | 5.969482  | 3.719820  | -1.687364 |
| H  | 5.565430  | 5.026450  | -0.509590 |
| C  | -9.029393 | -0.579656 | 0.355038  |
| H  | -9.938911 | -1.137481 | 0.084206  |
| H  | -8.889487 | -0.631573 | 1.452660  |
| H  | -9.154480 | 0.479437  | 0.055209  |

6d

SCF Energy: -1649.76455482

ZPE-corrected Energy: -1649.29793

$\Delta U$ : -1649.26641

$\Delta H$ : -1649.26547

$\Delta G$ : -1649.36508

Num. Imaginary Frequencies: 0

|    |           |           |           |
|----|-----------|-----------|-----------|
| C  | 0.034534  | -3.810398 | 0.627419  |
| C  | -0.449569 | -2.664478 | -0.203922 |
| C  | -1.054633 | -4.463496 | 1.076083  |
| N  | -2.232606 | -3.771489 | 0.707396  |
| C  | -1.903248 | -2.660949 | 0.054345  |
| C  | -0.122047 | -1.170584 | -0.238726 |
| C  | -1.398317 | -0.531042 | -0.320597 |
| C  | -2.487217 | -1.394283 | -0.186622 |
| C  | 1.099079  | -0.544829 | -0.203270 |
| C  | 2.342164  | -1.315430 | -0.242654 |
| C  | 2.528816  | -2.417850 | -1.105456 |
| C  | 3.711317  | -3.135695 | -1.118169 |
| C  | 4.760390  | -2.795115 | -0.248239 |
| C  | 4.607463  | -1.696379 | 0.607622  |
| C  | 3.425010  | -0.963546 | 0.582082  |
| Au | 1.231067  | 1.542428  | -0.048676 |
| P  | 1.410991  | 3.918973  | 0.080988  |
| C  | 2.515835  | 4.524878  | 1.401438  |
| C  | -0.166727 | 4.783251  | 0.389535  |
| C  | 2.058074  | 4.704745  | -1.433845 |
| H  | -3.160692 | -3.995782 | 1.064591  |
| H  | 1.067632  | -4.152571 | 0.711671  |
| H  | -0.351409 | -3.006450 | -1.265947 |
| H  | -1.139529 | -5.400070 | 1.629396  |
| H  | -1.492118 | 0.551594  | -0.477338 |
| C  | -3.911049 | -1.068250 | -0.152575 |
| H  | 1.740728  | -2.693101 | -1.816003 |
| H  | 3.860088  | -3.976072 | -1.805224 |
| O  | 5.862362  | -3.558694 | -0.317381 |
| H  | 5.408597  | -1.393788 | 1.288536  |
| H  | 3.323254  | -0.094487 | 1.245061  |
| H  | 2.153969  | 4.169360  | 2.382461  |
| H  | 3.535632  | 4.132157  | 1.241329  |
| H  | 2.547011  | 5.630681  | 1.402856  |
| H  | -0.006688 | 5.877031  | 0.431345  |
| H  | -0.882367 | 4.550855  | -0.418976 |
| H  | -0.597619 | 4.441818  | 1.347399  |
| H  | 2.114520  | 5.802248  | -1.306952 |
| H  | 3.065933  | 4.310950  | -1.654667 |
| H  | 1.396952  | 4.470078  | -2.286836 |
| C  | -4.362008 | 0.218185  | 0.169422  |
| C  | -4.878051 | -2.045724 | -0.450859 |
| C  | -6.230702 | -1.751272 | -0.419324 |
| C  | -6.667444 | -0.458619 | -0.092664 |
| C  | -5.718182 | 0.529778  | 0.200444  |
| H  | -3.637752 | 1.002055  | 0.421499  |
| H  | -4.562741 | -3.055120 | -0.745165 |
| H  | -6.984037 | -2.509902 | -0.657530 |
| O  | -7.996589 | -0.262407 | -0.086661 |
| H  | -6.024432 | 1.546483  | 0.463943  |
| C  | -8.499773 | 1.013416  | 0.218883  |
| H  | -9.596707 | 0.944145  | 0.158815  |
| H  | -8.215108 | 1.328420  | 1.241971  |
| H  | -8.147085 | 1.773202  | -0.505879 |
| C  | 6.951287  | -3.269535 | 0.522966  |
| H  | 7.727587  | -4.018695 | 0.304598  |
| H  | 7.359932  | -2.259391 | 0.324766  |
| H  | 6.669315  | -3.343556 | 1.591525  |

TS\_4d\_5d  
SCF Energy: -1649.73726564  
ZPE-corrected Energy: -1649.27253  
 $\Delta U$ : -1649.24074  
 $\Delta H$ : -1649.23979  
 $\Delta G$ : -1649.34065

Num. Imaginary Frequencies: 1

Imaginary Frequency: -488.9385

|    |           |           |           |
|----|-----------|-----------|-----------|
| C  | -0.753885 | 4.066240  | 0.287212  |
| C  | -1.805269 | 4.138876  | 1.159926  |
| N  | -2.572638 | 3.001977  | 1.019606  |
| C  | -2.033458 | 2.185514  | 0.078990  |
| C  | -0.860183 | 2.809795  | -0.398588 |
| C  | -2.497949 | 0.850108  | -0.214009 |
| C  | -3.941538 | 0.560004  | -0.188795 |
| C  | -4.871179 | 1.510305  | -0.655628 |
| C  | -6.228523 | 1.239893  | -0.672225 |
| C  | -6.712647 | 0.004313  | -0.215277 |
| C  | -5.805170 | -0.949801 | 0.262956  |
| C  | -4.442506 | -0.664809 | 0.272832  |
| H  | 0.009051  | 4.830670  | 0.130722  |
| H  | -2.084868 | 4.908833  | 1.879821  |
| H  | -3.372836 | 2.759970  | 1.601590  |
| H  | -0.467115 | 2.627592  | -1.405679 |
| H  | -4.516322 | 2.476308  | -1.035886 |
| H  | -6.950333 | 1.974154  | -1.046197 |
| O  | -8.043266 | -0.170311 | -0.266020 |
| H  | -6.149389 | -1.915351 | 0.645298  |
| H  | -3.753790 | -1.415020 | 0.679117  |
| C  | -1.555160 | -0.129898 | -0.388485 |
| C  | -0.138750 | 0.080830  | -0.225874 |
| C  | 0.526557  | 1.195563  | -0.072412 |
| Au | 1.173903  | -1.590299 | -0.013307 |
| H  | -1.905222 | -1.151602 | -0.579304 |
| C  | 1.804334  | 1.833240  | -0.181027 |
| C  | 2.656600  | 1.547972  | -1.272396 |
| C  | 3.904678  | 2.129615  | -1.363615 |
| C  | 4.344398  | 3.026106  | -0.371496 |
| C  | 3.506244  | 3.327126  | 0.715215  |
| C  | 2.253391  | 2.736025  | 0.797357  |
| H  | 2.315423  | 0.850168  | -2.046382 |
| H  | 4.577033  | 1.915017  | -2.201050 |
| O  | 5.564486  | 3.540245  | -0.545800 |
| H  | 3.824658  | 4.019048  | 1.500177  |
| H  | 1.596152  | 2.973639  | 1.642173  |
| P  | 2.567366  | -3.485438 | 0.202114  |
| C  | 2.931821  | -3.950032 | 1.926687  |
| C  | 1.886358  | -5.000668 | -0.547577 |
| C  | 4.204316  | -3.284825 | -0.575011 |
| H  | 3.585737  | -4.841794 | 1.952804  |
| H  | 3.436749  | -3.112225 | 2.439039  |
| H  | 1.990830  | -4.171723 | 2.460290  |
| H  | 4.812295  | -4.198464 | -0.435814 |
| H  | 4.081174  | -3.089808 | -1.654958 |
| H  | 4.728116  | -2.424746 | -0.121643 |
| H  | 2.587159  | -5.845247 | -0.408694 |
| H  | 0.919348  | -5.248560 | -0.075648 |
| H  | 1.718674  | -4.838981 | -1.627065 |
| C  | 6.080799  | 4.448661  | 0.399024  |
| H  | 7.085225  | 4.729087  | 0.048193  |
| H  | 5.454066  | 5.358424  | 0.466475  |
| H  | 6.163568  | 3.984063  | 1.400122  |
| C  | -8.591278 | -1.390209 | 0.165475  |
| H  | -9.680355 | -1.316150 | 0.023847  |
| H  | -8.207438 | -2.240872 | -0.431149 |
| H  | -8.379723 | -1.574220 | 1.237097  |



TS\_4d.6d  
SCF Energy: -1649.73655130  
ZPE-corrected Energy: -1649.27181  
 $\Delta U$ : -1649.24016  
 $\Delta H$ : -1649.23921  
 $\Delta G$ : -1649.33906

Num. Imaginary Frequencies: 1

Imaginary Frequency: -472.4948

|    |           |           |           |
|----|-----------|-----------|-----------|
| C  | -0.067576 | -3.661421 | 0.997936  |
| C  | -0.585695 | -2.799398 | -0.022849 |
| C  | -1.046851 | -3.782966 | 1.949859  |
| N  | -2.147831 | -3.042265 | 1.572275  |
| C  | -1.885020 | -2.413830 | 0.398371  |
| C  | -0.182345 | -0.800867 | -0.455931 |
| C  | -1.519908 | -0.452409 | -0.724876 |
| C  | -2.505100 | -1.264750 | -0.188878 |
| C  | 1.085226  | -0.485316 | -0.383599 |
| C  | 2.245449  | -1.371622 | -0.456362 |
| C  | 2.349095  | -2.345070 | -1.469762 |
| C  | 3.417790  | -3.224596 | -1.510807 |
| C  | 4.421098  | -3.170107 | -0.530646 |
| C  | 4.342977  | -2.198572 | 0.475266  |
| C  | 3.274064  | -1.304769 | 0.492357  |
| Au | 1.339787  | 1.601079  | -0.053263 |
| P  | 1.688035  | 3.918270  | 0.266348  |
| C  | 0.163273  | 4.915720  | 0.199203  |
| C  | 2.784928  | 4.674237  | -0.977779 |
| C  | 2.447144  | 4.352793  | 1.865803  |
| H  | -2.941772 | -2.838033 | 2.176674  |
| H  | 0.888074  | -4.189172 | 0.984047  |
| H  | -0.308777 | -2.901531 | -1.080709 |
| H  | -1.066476 | -4.359224 | 2.876104  |
| H  | -1.740217 | 0.401176  | -1.380633 |
| C  | -3.936501 | -0.997689 | -0.180655 |
| H  | 1.585439  | -2.391012 | -2.256257 |
| H  | 3.507565  | -3.975000 | -2.304084 |
| O  | 5.412922  | -4.071437 | -0.642867 |
| H  | 5.113171  | -2.121950 | 1.248709  |
| H  | 3.224256  | -0.543218 | 1.280880  |
| H  | -0.322839 | 4.786461  | -0.783955 |
| H  | -0.536632 | 4.579913  | 0.984609  |
| H  | 0.398243  | 5.985620  | 0.352519  |
| H  | 2.905802  | 5.755305  | -0.777370 |
| H  | 3.774281  | 4.184788  | -0.946879 |
| H  | 2.356156  | 4.535306  | -1.985804 |
| H  | 2.578149  | 5.448725  | 1.941912  |
| H  | 1.802554  | 4.004659  | 2.691957  |
| H  | 3.431566  | 3.860692  | 1.956561  |
| C  | -4.434662 | 0.305754  | -0.327602 |
| C  | -4.867362 | -2.045800 | -0.035356 |
| C  | -6.227869 | -1.798624 | -0.036836 |
| C  | -6.710878 | -0.488506 | -0.188889 |
| C  | -5.799117 | 0.567876  | -0.334901 |
| H  | -3.736929 | 1.146532  | -0.419441 |
| H  | -4.513972 | -3.080610 | 0.054408  |
| H  | -6.955040 | -2.610949 | 0.067095  |
| O  | -8.042422 | -0.343184 | -0.181367 |
| H  | -6.143904 | 1.600085  | -0.445460 |
| C  | -8.598385 | 0.938975  | -0.343337 |
| H  | -9.691465 | 0.814618  | -0.315500 |
| H  | -8.291808 | 1.619058  | 0.474923  |
| H  | -8.310384 | 1.384426  | -1.315249 |
| C  | 6.450945  | -4.066288 | 0.303126  |
| H  | 7.138542  | -4.879669 | 0.024685  |
| H  | 7.005848  | -3.107511 | 0.293199  |
| H  | 6.069357  | -4.252514 | 1.326441  |
